# Supplementary material
Source: ML conference proceedings conference paper supplement (https://proceedings.neurips.cc/paper_files/paper/2022/hash/0113ef4642264adc2e6924a3cbbdf532-Abstract.html)
Supplement: Supplementary file 1 [file 0113ef4642264adc2e6924a3cbbdf532-Supplemental-Conference.zip]

Archive with 1,218 entries (1,162 files):
- neurips_supplementary_cameraready/
- __MACOSX/._neurips_supplementary_cameraready
- neurips_supplementary_cameraready/task_performance_zscore.py
- __MACOSX/neurips_supplementary_cameraready/._task_performance_zscore.py
- neurips_supplementary_cameraready/train_aux_ppo.py
- __MACOSX/neurips_supplementary_cameraready/._train_aux_ppo.py
- neurips_supplementary_cameraready/auxillary_model.py
- __MACOSX/neurips_supplementary_cameraready/._auxillary_model.py
- neurips_supplementary_cameraready/.DS_Store
- __MACOSX/neurips_supplementary_cameraready/._.DS_Store
- neurips_supplementary_cameraready/ec-master/
- __MACOSX/neurips_supplementary_cameraready/._ec-master
- neurips_supplementary_cameraready/small_env_4x4.py
- __MACOSX/neurips_supplementary_cameraready/._small_env_4x4.py
- neurips_supplementary_cameraready/train_ppo.py
- __MACOSX/neurips_supplementary_cameraready/._train_ppo.py
- neurips_supplementary_cameraready/auxillary_policy.py
- __MACOSX/neurips_supplementary_cameraready/._auxillary_policy.py
- neurips_supplementary_cameraready/small_env_lang_4x4.py
- __MACOSX/neurips_supplementary_cameraready/._small_env_lang_4x4.py
- neurips_supplementary_cameraready/README.txt
- __MACOSX/neurips_supplementary_cameraready/._README.txt
- neurips_supplementary_cameraready/NeurIPS_2022_Language_and_Program_appendixseperate.pdf
- __MACOSX/neurips_supplementary_cameraready/._NeurIPS_2022_Language_and_Program_appendixseperate.pdf
- neurips_supplementary_cameraready/data/
- __MACOSX/neurips_supplementary_cameraready/._data
- neurips_supplementary_cameraready/ec-master/official_experiments
- __MACOSX/neurips_supplementary_cameraready/ec-master/._official_experiments
- neurips_supplementary_cameraready/ec-master/failures/
- __MACOSX/neurips_supplementary_cameraready/ec-master/._failures
- neurips_supplementary_cameraready/ec-master/best_regex_frontier.txt
- __MACOSX/neurips_supplementary_cameraready/ec-master/._best_regex_frontier.txt
- neurips_supplementary_cameraready/ec-master/pinn/
- __MACOSX/neurips_supplementary_cameraready/ec-master/._pinn
- neurips_supplementary_cameraready/ec-master/pregex/
- __MACOSX/neurips_supplementary_cameraready/ec-master/._pregex
- neurips_supplementary_cameraready/ec-master/.DS_Store
- __MACOSX/neurips_supplementary_cameraready/ec-master/._.DS_Store
- neurips_supplementary_cameraready/ec-master/LICENSE
- __MACOSX/neurips_supplementary_cameraready/ec-master/._LICENSE
- neurips_supplementary_cameraready/ec-master/requirements.txt
- __MACOSX/neurips_supplementary_cameraready/ec-master/._requirements.txt
- neurips_supplementary_cameraready/ec-master/dreamcoder/
- __MACOSX/neurips_supplementary_cameraready/ec-master/._dreamcoder
- neurips_supplementary_cameraready/ec-master/rust_compressor/
- __MACOSX/neurips_supplementary_cameraready/ec-master/._rust_compressor
- neurips_supplementary_cameraready/ec-master/bin/
- __MACOSX/neurips_supplementary_cameraready/ec-master/._bin
- neurips_supplementary_cameraready/ec-master/Makefile
- __MACOSX/neurips_supplementary_cameraready/ec-master/._Makefile
- neurips_supplementary_cameraready/ec-master/runtests
- __MACOSX/neurips_supplementary_cameraready/ec-master/._runtests
- neurips_supplementary_cameraready/ec-master/tests/
- __MACOSX/neurips_supplementary_cameraready/ec-master/._tests
- neurips_supplementary_cameraready/ec-master/__init__.py
- __MACOSX/neurips_supplementary_cameraready/ec-master/.___init__.py
- neurips_supplementary_cameraready/ec-master/solvers/
- __MACOSX/neurips_supplementary_cameraready/ec-master/._solvers
- neurips_supplementary_cameraready/ec-master/docs/
- __MACOSX/neurips_supplementary_cameraready/ec-master/._docs
- neurips_supplementary_cameraready/ec-master/.gitmodules
- __MACOSX/neurips_supplementary_cameraready/ec-master/._.gitmodules
- neurips_supplementary_cameraready/ec-master/pyccg/
- __MACOSX/neurips_supplementary_cameraready/ec-master/._pyccg
- neurips_supplementary_cameraready/ec-master/Readme.md
- __MACOSX/neurips_supplementary_cameraready/ec-master/._Readme.md
- neurips_supplementary_cameraready/ec-master/PBE_Strings_Track/
- __MACOSX/neurips_supplementary_cameraready/ec-master/._PBE_Strings_Track
- neurips_supplementary_cameraready/ec-master/prototypical-networks/
- __MACOSX/neurips_supplementary_cameraready/ec-master/._prototypical-networks
- neurips_supplementary_cameraready/ec-master/.gitignore
- __MACOSX/neurips_supplementary_cameraready/ec-master/._.gitignore
- neurips_supplementary_cameraready/ec-master/singularity
- __MACOSX/neurips_supplementary_cameraready/ec-master/._singularity
- neurips_supplementary_cameraready/ec-master/graphs
- __MACOSX/neurips_supplementary_cameraready/ec-master/._graphs
- neurips_supplementary_cameraready/ec-master/official_figures
- __MACOSX/neurips_supplementary_cameraready/ec-master/._official_figures
- neurips_supplementary_cameraready/ec-master/data/
- __MACOSX/neurips_supplementary_cameraready/ec-master/._data
- neurips_supplementary_cameraready/ec-master/logReports
- __MACOSX/neurips_supplementary_cameraready/ec-master/._logReports
- neurips_supplementary_cameraready/data/500_gsp_samples-recognition_activations-structurePenalty2.npz
- __MACOSX/neurips_supplementary_cameraready/data/._500_gsp_samples-recognition_activations-structurePenalty2.npz
- neurips_supplementary_cameraready/data/gsp_4x4.npy
- __MACOSX/neurips_supplementary_cameraready/data/._gsp_4x4.npy
- neurips_supplementary_cameraready/data/500_gsp_samples_text_human.npy
- __MACOSX/neurips_supplementary_cameraready/data/._500_gsp_samples_text_human.npy
- neurips_supplementary_cameraready/data/gsp_4x4_null_sample_starts.npy
- __MACOSX/neurips_supplementary_cameraready/data/._gsp_4x4_null_sample_starts.npy
- neurips_supplementary_cameraready/data/gsp_4x4_sample.npy
- __MACOSX/neurips_supplementary_cameraready/data/._gsp_4x4_sample.npy
- neurips_supplementary_cameraready/data/gsp_4x4_sample_starts.npy
- __MACOSX/neurips_supplementary_cameraready/data/._gsp_4x4_sample_starts.npy
- neurips_supplementary_cameraready/data/hyperparams_grounding.pkl
- __MACOSX/neurips_supplementary_cameraready/data/._hyperparams_grounding.pkl
- neurips_supplementary_cameraready/data/gsp_4x4_full_probs.npy
- __MACOSX/neurips_supplementary_cameraready/data/._gsp_4x4_full_probs.npy
- neurips_supplementary_cameraready/data/500_gsp_samples-recognition_activations.npz
- __MACOSX/neurips_supplementary_cameraready/data/._500_gsp_samples-recognition_activations.npz
- neurips_supplementary_cameraready/data/500_gsp_samples_text_human_encoded.npy
- __MACOSX/neurips_supplementary_cameraready/data/._500_gsp_samples_text_human_encoded.npy
- neurips_supplementary_cameraready/data/hyperparams_nogrounding.pkl
- __MACOSX/neurips_supplementary_cameraready/data/._hyperparams_nogrounding.pkl
- neurips_supplementary_cameraready/data/gsp_4x4_null_sample.npy
- __MACOSX/neurips_supplementary_cameraready/data/._gsp_4x4_null_sample.npy
- neurips_supplementary_cameraready/data/gsp_4x4_full.npy
- __MACOSX/neurips_supplementary_cameraready/data/._gsp_4x4_full.npy
- neurips_supplementary_cameraready/data/500_gsp_samples_text_synth_encoded.npy
- __MACOSX/neurips_supplementary_cameraready/data/._500_gsp_samples_text_synth_encoded.npy
- neurips_supplementary_cameraready/data/500_gsp_samples_text_synth.npy
- __MACOSX/neurips_supplementary_cameraready/data/._500_gsp_samples_text_synth.npy
- neurips_supplementary_cameraready/data/500_gsp_samples.npy
- __MACOSX/neurips_supplementary_cameraready/data/._500_gsp_samples.npy
- neurips_supplementary_cameraready/ec-master/failures/.dummy
- __MACOSX/neurips_supplementary_cameraready/ec-master/failures/._.dummy
- neurips_supplementary_cameraready/ec-master/dreamcoder/recognition.py
- __MACOSX/neurips_supplementary_cameraready/ec-master/dreamcoder/._recognition.py
- neurips_supplementary_cameraready/ec-master/dreamcoder/task.py
- __MACOSX/neurips_supplementary_cameraready/ec-master/dreamcoder/._task.py
- neurips_supplementary_cameraready/ec-master/dreamcoder/fragmentGrammar.py
- __MACOSX/neurips_supplementary_cameraready/ec-master/dreamcoder/._fragmentGrammar.py
- neurips_supplementary_cameraready/ec-master/dreamcoder/domains/
- __MACOSX/neurips_supplementary_cameraready/ec-master/dreamcoder/._domains
- neurips_supplementary_cameraready/ec-master/dreamcoder/.DS_Store
- __MACOSX/neurips_supplementary_cameraready/ec-master/dreamcoder/._.DS_Store
- neurips_supplementary_cameraready/ec-master/dreamcoder/ec.py
- __MACOSX/neurips_supplementary_cameraready/ec-master/dreamcoder/._ec.py
- neurips_supplementary_cameraready/ec-master/dreamcoder/enumeration.py
- __MACOSX/neurips_supplementary_cameraready/ec-master/dreamcoder/._enumeration.py
- neurips_supplementary_cameraready/ec-master/dreamcoder/likelihoodModel.py
- __MACOSX/neurips_supplementary_cameraready/ec-master/dreamcoder/._likelihoodModel.py
- neurips_supplementary_cameraready/ec-master/dreamcoder/compression.py
- __MACOSX/neurips_supplementary_cameraready/ec-master/dreamcoder/._compression.py
- neurips_supplementary_cameraready/ec-master/dreamcoder/primitiveGraph.py
- __MACOSX/neurips_supplementary_cameraready/ec-master/dreamcoder/._primitiveGraph.py
- neurips_supplementary_cameraready/ec-master/dreamcoder/__init__.py
- __MACOSX/neurips_supplementary_cameraready/ec-master/dreamcoder/.___init__.py
- neurips_supplementary_cameraready/ec-master/dreamcoder/taskBatcher.py
- __MACOSX/neurips_supplementary_cameraready/ec-master/dreamcoder/._taskBatcher.py
- neurips_supplementary_cameraready/ec-master/dreamcoder/type.py
- __MACOSX/neurips_supplementary_cameraready/ec-master/dreamcoder/._type.py
- neurips_supplementary_cameraready/ec-master/dreamcoder/grammar.py
- __MACOSX/neurips_supplementary_cameraready/ec-master/dreamcoder/._grammar.py
- neurips_supplementary_cameraready/ec-master/dreamcoder/vs.py
- __MACOSX/neurips_supplementary_cameraready/ec-master/dreamcoder/._vs.py
- neurips_supplementary_cameraready/ec-master/dreamcoder/dreamcoder.py
- __MACOSX/neurips_supplementary_cameraready/ec-master/dreamcoder/._dreamcoder.py
- neurips_supplementary_cameraready/ec-master/dreamcoder/program.py
- __MACOSX/neurips_supplementary_cameraready/ec-master/dreamcoder/._program.py
- neurips_supplementary_cameraready/ec-master/dreamcoder/utilities.py
- __MACOSX/neurips_supplementary_cameraready/ec-master/dreamcoder/._utilities.py
- neurips_supplementary_cameraready/ec-master/dreamcoder/differentiation.py
- __MACOSX/neurips_supplementary_cameraready/ec-master/dreamcoder/._differentiation.py
- neurips_supplementary_cameraready/ec-master/dreamcoder/fragmentUtilities.py
- __MACOSX/neurips_supplementary_cameraready/ec-master/dreamcoder/._fragmentUtilities.py
- neurips_supplementary_cameraready/ec-master/dreamcoder/dreaming.py
- __MACOSX/neurips_supplementary_cameraready/ec-master/dreamcoder/._dreaming.py
- neurips_supplementary_cameraready/ec-master/dreamcoder/frontier.py
- __MACOSX/neurips_supplementary_cameraready/ec-master/dreamcoder/._frontier.py
- neurips_supplementary_cameraready/ec-master/dreamcoder/deprecated/
- __MACOSX/neurips_supplementary_cameraready/ec-master/dreamcoder/._deprecated
- neurips_supplementary_cameraready/ec-master/rust_compressor/Cargo.toml
- __MACOSX/neurips_supplementary_cameraready/ec-master/rust_compressor/._Cargo.toml
- neurips_supplementary_cameraready/ec-master/rust_compressor/Makefile
- __MACOSX/neurips_supplementary_cameraready/ec-master/rust_compressor/._Makefile
- neurips_supplementary_cameraready/ec-master/rust_compressor/Cargo.lock
- __MACOSX/neurips_supplementary_cameraready/ec-master/rust_compressor/._Cargo.lock
- neurips_supplementary_cameraready/ec-master/rust_compressor/example_input.json
- __MACOSX/neurips_supplementary_cameraready/ec-master/rust_compressor/._example_input.json
- neurips_supplementary_cameraready/ec-master/rust_compressor/src/
- __MACOSX/neurips_supplementary_cameraready/ec-master/rust_compressor/._src
- neurips_supplementary_cameraready/ec-master/bin/symmetryBreaking.py
- __MACOSX/neurips_supplementary_cameraready/ec-master/bin/._symmetryBreaking.py
- neurips_supplementary_cameraready/ec-master/bin/graphVersionSizes.py
- __MACOSX/neurips_supplementary_cameraready/ec-master/bin/._graphVersionSizes.py
- neurips_supplementary_cameraready/ec-master/bin/rational.py
- __MACOSX/neurips_supplementary_cameraready/ec-master/bin/._rational.py
- neurips_supplementary_cameraready/ec-master/bin/logReports.py
- __MACOSX/neurips_supplementary_cameraready/ec-master/bin/._logReports.py
- neurips_supplementary_cameraready/ec-master/bin/list.py
- __MACOSX/neurips_supplementary_cameraready/ec-master/bin/._list.py
- neurips_supplementary_cameraready/ec-master/bin/demoLogo.py
- __MACOSX/neurips_supplementary_cameraready/ec-master/bin/._demoLogo.py
- neurips_supplementary_cameraready/ec-master/bin/analyzeDepth.py
- __MACOSX/neurips_supplementary_cameraready/ec-master/bin/._analyzeDepth.py
- neurips_supplementary_cameraready/ec-master/bin/compiledDriver.py
- __MACOSX/neurips_supplementary_cameraready/ec-master/bin/._compiledDriver.py
- neurips_supplementary_cameraready/ec-master/bin/image_robustfill.py
- __MACOSX/neurips_supplementary_cameraready/ec-master/bin/._image_robustfill.py
- neurips_supplementary_cameraready/ec-master/bin/__init__.py
- __MACOSX/neurips_supplementary_cameraready/ec-master/bin/.___init__.py
- neurips_supplementary_cameraready/ec-master/bin/logo.py
- __MACOSX/neurips_supplementary_cameraready/ec-master/bin/._logo.py
- neurips_supplementary_cameraready/ec-master/bin/taskRankGraphs.py
- __MACOSX/neurips_supplementary_cameraready/ec-master/bin/._taskRankGraphs.py
- neurips_supplementary_cameraready/ec-master/bin/tower.py
- __MACOSX/neurips_supplementary_cameraready/ec-master/bin/._tower.py
- neurips_supplementary_cameraready/ec-master/bin/physics.py
- __MACOSX/neurips_supplementary_cameraready/ec-master/bin/._physics.py
- neurips_supplementary_cameraready/ec-master/bin/launch.py
- __MACOSX/neurips_supplementary_cameraready/ec-master/bin/._launch.py
- neurips_supplementary_cameraready/ec-master/bin/syntax_robustfill.py
- __MACOSX/neurips_supplementary_cameraready/ec-master/bin/._syntax_robustfill.py
- neurips_supplementary_cameraready/ec-master/bin/text.py
- __MACOSX/neurips_supplementary_cameraready/ec-master/bin/._text.py
- neurips_supplementary_cameraready/ec-master/bin/regexes.py
- __MACOSX/neurips_supplementary_cameraready/ec-master/bin/._regexes.py
- neurips_supplementary_cameraready/ec-master/bin/scientificLaws.py
- __MACOSX/neurips_supplementary_cameraready/ec-master/bin/._scientificLaws.py
- neurips_supplementary_cameraready/ec-master/bin/graphs.py
- __MACOSX/neurips_supplementary_cameraready/ec-master/bin/._graphs.py
- neurips_supplementary_cameraready/ec-master/bin/rbBaseline.py
- __MACOSX/neurips_supplementary_cameraready/ec-master/bin/._rbBaseline.py
- neurips_supplementary_cameraready/ec-master/bin/binutil.py
- __MACOSX/neurips_supplementary_cameraready/ec-master/bin/._binutil.py
- neurips_supplementary_cameraready/ec-master/bin/examineFrontier.py
- __MACOSX/neurips_supplementary_cameraready/ec-master/bin/._examineFrontier.py
- neurips_supplementary_cameraready/ec-master/bin/deprecated/
- __MACOSX/neurips_supplementary_cameraready/ec-master/bin/._deprecated
- neurips_supplementary_cameraready/ec-master/tests/test_tower.py
- __MACOSX/neurips_supplementary_cameraready/ec-master/tests/._test_tower.py
- neurips_supplementary_cameraready/ec-master/tests/test_compression.py
- __MACOSX/neurips_supplementary_cameraready/ec-master/tests/._test_compression.py
- neurips_supplementary_cameraready/ec-master/tests/test_list.py
- __MACOSX/neurips_supplementary_cameraready/ec-master/tests/._test_list.py
- neurips_supplementary_cameraready/ec-master/tests/test_recognition.py
- __MACOSX/neurips_supplementary_cameraready/ec-master/tests/._test_recognition.py
- neurips_supplementary_cameraready/ec-master/tests/integration/
- __MACOSX/neurips_supplementary_cameraready/ec-master/tests/._integration
- neurips_supplementary_cameraready/ec-master/tests/resources/
- __MACOSX/neurips_supplementary_cameraready/ec-master/tests/._resources
- neurips_supplementary_cameraready/ec-master/tests/__init__.py
- __MACOSX/neurips_supplementary_cameraready/ec-master/tests/.___init__.py
- neurips_supplementary_cameraready/ec-master/tests/test_enumeration.py
- __MACOSX/neurips_supplementary_cameraready/ec-master/tests/._test_enumeration.py
- neurips_supplementary_cameraready/ec-master/tests/test_dreamcoder.py
- __MACOSX/neurips_supplementary_cameraready/ec-master/tests/._test_dreamcoder.py
- neurips_supplementary_cameraready/ec-master/tests/README.md
- __MACOSX/neurips_supplementary_cameraready/ec-master/tests/._README.md
- neurips_supplementary_cameraready/ec-master/tests/test_regexes.py
- __MACOSX/neurips_supplementary_cameraready/ec-master/tests/._test_regexes.py
- neurips_supplementary_cameraready/ec-master/tests/test_text.py
- __MACOSX/neurips_supplementary_cameraready/ec-master/tests/._test_text.py
- neurips_supplementary_cameraready/ec-master/tests/test_dreaming.py
- __MACOSX/neurips_supplementary_cameraready/ec-master/tests/._test_dreaming.py
- neurips_supplementary_cameraready/ec-master/tests/test_fragmentGrammar.py
- __MACOSX/neurips_supplementary_cameraready/ec-master/tests/._test_fragmentGrammar.py
- neurips_supplementary_cameraready/ec-master/tests/test_logo.py
- __MACOSX/neurips_supplementary_cameraready/ec-master/tests/._test_logo.py
- neurips_supplementary_cameraready/ec-master/tests/test_symmetryBreaking.py
- __MACOSX/neurips_supplementary_cameraready/ec-master/tests/._test_symmetryBreaking.py
- neurips_supplementary_cameraready/ec-master/tests/test.sh
- __MACOSX/neurips_supplementary_cameraready/ec-master/tests/._test.sh
- neurips_supplementary_cameraready/ec-master/solvers/program.ml
- __MACOSX/neurips_supplementary_cameraready/ec-master/solvers/._program.ml
- neurips_supplementary_cameraready/ec-master/solvers/Euclid.ml
- __MACOSX/neurips_supplementary_cameraready/ec-master/solvers/._Euclid.ml
- neurips_supplementary_cameraready/ec-master/solvers/funarray.ml
- __MACOSX/neurips_supplementary_cameraready/ec-master/solvers/._funarray.ml
- neurips_supplementary_cameraready/ec-master/solvers/logoSequenceString.ml
- __MACOSX/neurips_supplementary_cameraready/ec-master/solvers/._logoSequenceString.ml
- neurips_supplementary_cameraready/ec-master/solvers/sfg.ml
- __MACOSX/neurips_supplementary_cameraready/ec-master/solvers/._sfg.ml
- neurips_supplementary_cameraready/ec-master/solvers/string_transformation.ml
- __MACOSX/neurips_supplementary_cameraready/ec-master/solvers/._string_transformation.ml
- neurips_supplementary_cameraready/ec-master/solvers/cache_pb.ml
- __MACOSX/neurips_supplementary_cameraready/ec-master/solvers/._cache_pb.ml
- neurips_supplementary_cameraready/ec-master/solvers/versionDemo.ml
- __MACOSX/neurips_supplementary_cameraready/ec-master/solvers/._versionDemo.ml
- neurips_supplementary_cameraready/ec-master/solvers/geomDrawFile.ml
- __MACOSX/neurips_supplementary_cameraready/ec-master/solvers/._geomDrawFile.ml
- neurips_supplementary_cameraready/ec-master/solvers/utils.ml
- __MACOSX/neurips_supplementary_cameraready/ec-master/solvers/._utils.ml
- neurips_supplementary_cameraready/ec-master/solvers/gridTest.ml
- __MACOSX/neurips_supplementary_cameraready/ec-master/solvers/._gridTest.ml
- neurips_supplementary_cameraready/ec-master/solvers/physics.ml
- __MACOSX/neurips_supplementary_cameraready/ec-master/solvers/._physics.ml
- neurips_supplementary_cameraready/ec-master/solvers/tower.ml
- __MACOSX/neurips_supplementary_cameraready/ec-master/solvers/._tower.ml
- neurips_supplementary_cameraready/ec-master/solvers/parser.ml
- __MACOSX/neurips_supplementary_cameraready/ec-master/solvers/._parser.ml
- neurips_supplementary_cameraready/ec-master/solvers/geomDrawLambdaString.ml
- __MACOSX/neurips_supplementary_cameraready/ec-master/solvers/._geomDrawLambdaString.ml
- neurips_supplementary_cameraready/ec-master/solvers/Makefile
- __MACOSX/neurips_supplementary_cameraready/ec-master/solvers/._Makefile
- neurips_supplementary_cameraready/ec-master/solvers/jbuild
- __MACOSX/neurips_supplementary_cameraready/ec-master/solvers/._jbuild
- neurips_supplementary_cameraready/ec-master/solvers/Dreaming.ml
- __MACOSX/neurips_supplementary_cameraready/ec-master/solvers/._Dreaming.ml
- neurips_supplementary_cameraready/ec-master/solvers/logoLib/
- __MACOSX/neurips_supplementary_cameraready/ec-master/solvers/._logoLib
- neurips_supplementary_cameraready/ec-master/solvers/CachingTable.ml
- __MACOSX/neurips_supplementary_cameraready/ec-master/solvers/._CachingTable.ml
- neurips_supplementary_cameraready/ec-master/solvers/polynomial.ml
- __MACOSX/neurips_supplementary_cameraready/ec-master/solvers/._polynomial.ml
- neurips_supplementary_cameraready/ec-master/solvers/cache_types.mli
- __MACOSX/neurips_supplementary_cameraready/ec-master/solvers/._cache_types.mli
- neurips_supplementary_cameraready/ec-master/solvers/differentiation.ml
- __MACOSX/neurips_supplementary_cameraready/ec-master/solvers/._differentiation.ml
[truncated: 918 more entries]
