# Supplementary material
Source: ML conference proceedings conference paper supplement (https://proceedings.neurips.cc/paper_files/paper/2022/hash/0113ef4642264adc2e6924a3cbbdf532-Abstract.html)
Supplement: Supplementary file 1 [file 0113ef4642264adc2e6924a3cbbdf532-Supplemental-Conference.zip › neurips_supplementary_cameraready/ec-master/bin/demoLogo.py]

try:
    import binutil  # required to import from dreamcoder modules
except ModuleNotFoundError:
    import bin.binutil  # alt import if called as module

from dreamcoder.domains.logo.makeLogoTasks import demoLogoTasks

if __name__ == "__main__":
    demoLogoTasks()
