# Supplementary material
Source: ML conference proceedings conference paper supplement (https://proceedings.neurips.cc/paper_files/paper/2022/hash/0113ef4642264adc2e6924a3cbbdf532-Abstract.html)
Supplement: Supplementary file 1 [file 0113ef4642264adc2e6924a3cbbdf532-Supplemental-Conference.zip › neurips_supplementary_cameraready/ec-master/bin/launch.py]

from datetime import datetime
import time
import subprocess
import os
import json
import sys

ZONE = None

## Azure configuration flags.
# Approximate conversion between similar VMs on Amazon and Azure.
AMAZON_TO_AZURE_SIZING = {
    "n1-standard-64" : "Standard_E64_v3",
    "n1-highmem-64" : "Standard_E64_v4",
    "n1-highmem-96" : "Standard_E64_v4",
    "n1-standard-20" : "Standard_E16_v3"
}
AZURE_DEFAULT_RESOURCE_GROUP = "ec2_resource_group_0"
AZURE_DEFAULT_REGION = "eastus"
AZURE_DEFAULT_BASE_IMAGE = "/subscriptions/655f1464-5d1f-48ef-9ed3-dca83e60bdd5/resourceGroups/ec2_resource_group_0/providers/Microsoft.Compute/galleries/cocosci/images/ec_base_image_1"
AZURE_DEFAULT_USERNAME = "azureuser"

def user():
    import getpass
    return getpass.getuser()


def branch():
    return subprocess.check_output(
        ['git', 'rev-parse', '--abbrev-ref', 'HEAD']).decode("utf-8").strip()

def launchAzureCloud(size,name,region):
    """
    Provisions an Azure VM. Requires Azure CLI: https://docs.microsoft.com/en-us/cli/azure/install-azure-cli. Users must be added to the Computational Cognitive Science Azure account with login credentials.
    > az account set --subscription "Computational Cognitive Science Lab" to use the default subscription.
    """
    print("#######Launching on Azure cloud...")
    if size in AMAZON_TO_AZURE_SIZING: size = AMAZON_TO_AZURE_SIZING[size]
    name = name.replace('_','-').replace('.','-').lower()
    azure_command = f"az vm create --size {size} --name {name} --generate-ssh-keys --data-disk-sizes-gb 64 --location {region} --image {AZURE_DEFAULT_BASE_IMAGE} --resource-group {AZURE_DEFAULT_RESOURCE_GROUP}"
    
    output = subprocess.check_output(["/bin/bash", "-c", azure_command])
    output = json.loads(output)
    ip_address = output['publicIpAddress']
    print(f"Launched to: {name} | {AZURE_DEFAULT_USERNAME}@{ip_address}")
    return name, ip_address
     

def launchGoogleCloud(size, name):
    name = name.replace('_','-').replace('.','-').lower()
    os.system(f"gcloud compute --project tenenbaumlab disks create {name} --size 30 --zone us-east1-b --source-snapshot dreamcoder-jan26 --type pd-standard")
    output = \
        subprocess.check_output(["/bin/bash", "-c",
                             f"gcloud compute --project=tenenbaumlab instances create {name} --zone=us-east1-b --machine-type={size} --subnet=default --network-tier=PREMIUM --maintenance-policy=MIGRATE --service-account=150557817012-compute@developer.gserviceaccount.com --scopes=https://www.googleapis.com/auth/devstorage.read_only,https://www.googleapis.com/auth/logging.write,https://www.googleapis.com/auth/monitoring.write,https://www.googleapis.com/auth/servicecontrol,https://www.googleapis.com/auth/service.management.readonly,https://www.googleapis.com/auth/trace.append --disk=name={name},device-name={name},mode=rw,boot=yes,auto-delete=yes"])
    global ZONE
    ZONE = output.decode("utf-8").split("\n")[1].split()[1]
    print(f"Launching in zone {ZONE}")
    return name, name

def launchAmazonCloud(size="t2.micro", name=""):
    # aws ec2 run-instances --image-id ami-835f6ae6 --instance-type "t2.micro"
    # --key-name testing --associate-public-ip-address
    o = json.loads(subprocess.check_output(["aws", "ec2", "run-instances",
                                            "--image-id",
                                            "ami-05b392ead9557a161",
                                            #"ami-0d38af51a5f929bc8",
                                            #"ami-0351f49971957f1c9" if arguments.gpuImage else "ami-0866b9d387d1a80de",
                                            #"ami-0b75245c1e9b00c36",
                                            "--instance-type", size,
                                            "--security-groups", "publicssh",
                                            "--instance-initiated-shutdown-behavior", "terminate",
                                            "--key-name", "testing"]))
    instance = o["Instances"][0]["InstanceId"]
    print("Launched instance", instance)

    name = user() + name
    print("Naming instance", name)
    os.system(
        "aws ec2 create-tags --resources %s --tags Key=Name,Value=%s" %
        (instance, name))
    os.system("""
        aws ec2 modify-instance-attribute \
            --instance-id %s \
            --block-device-mappings '[
                {"DeviceName":"/dev/sda1","Ebs":{"DeleteOnTermination":true}}
            ]'
        """ % instance)

    o = json.loads(subprocess.check_output(["aws", "ec2", "describe-instances",
                                            "--instance-ids", instance]))
    address = o['Reservations'][0]['Instances'][0]['PublicIpAddress']
    print("Retrieved IP address of instance %s; got %s" % (instance, address))
    return instance, address

def scp(address, localFile, remoteFile):
    global ZONE
    if arguments.google:
        command = f"gcloud compute scp --zone={ZONE} {localFile} {address}:{remoteFile}"
    else:
        if arguments.azure:
            login_name = "azureuser"
            command = f"scp -o StrictHostKeyChecking=no -i ~/.ssh/id_rsa {localFile} {login_name}@{address}:{remoteFile}"
        else: # AWS
            login_name = "ubuntu"
            command = f"scp -o StrictHostKeyChecking=no -i ~/.ssh/testing.pem {localFile} {login_name}@{address}:{remoteFile}"
    print(command)
    os.system(command)

def ssh(address, command, pipeIn=None):
    global ZONE
    if arguments.google:
        command = f"gcloud compute ssh --zone={ZONE} {address} --command='{command}'"
    else:
        if arguments.azure:
            login_name = "azureuser"
            command = f"ssh -o StrictHostKeyChecking=no -i ~/.ssh/id_rsa {login_name}@{address} '{command}'"
        else: # AWS
            login_name = "ubuntu"
            command = f"ssh -o StrictHostKeyChecking=no -i ~/.ssh/testing.pem {login_name}@{address} '{command}'"
    if pipeIn:
        command = f"{pipeIn} | {command}"
    print(command)
    os.system(command)

def sendCheckpoint(address, checkpoint):
    print("Sending checkpoint:")
    scp(address, checkpoint, f"~/{os.path.split(checkpoint)[1]}")


def sendCommand(
        address,
        script,
        job_id,
        upload,
        ssh_key,
        resume,
        tar,
        shutdown,
        checkpoint=None):
    import tempfile

    br = branch()

    if checkpoint is None:
        copyCheckpoint = ""
    else:
        if '/' in checkpoint:
            checkpoint = os.path.split(checkpoint)[1]
        copyCheckpoint = "mv ~/%s ~/ec/experimentOutputs" % checkpoint

    preamble = f"""#!/bin/bash
cd ~/ec
{copyCheckpoint}
touch compressor_dummy
git fetch
git checkout {br}
git pull
"""
    #hack for non-kevin users ...
    if user() != "ellisk":
        cp_str = """#!/bin/bash
cp -r ../ellisk/ec ~/ec
"""
        preamble = cp_str + preamble

    if resume:
        print("Sending tar file")
        scp(address, resume, "~/ec/")
        preamble += "tar xf {}\n".format(os.path.basename(resume))
    else:
        preamble += "mv ~/patch ~/ec/patch\n"
        preamble += "git apply patch ; mkdir jobs\n"
        if not arguments.google or arguments.azure:
            # Google image already has these modules loaded
            preamble += "git submodule update --init --recursive\n"

    if upload:
        # This is probably a terribly insecure idea...
        # But I'm not sure what the right way of doing it is
        # I'm just going to copy over the local SSH identity
        # Assuming that this is an authorized key at the upload site this will work
        # Of course it also means that if anyone were to pull the keys off of AWS,
        # they would then have access to every machine that you have access to
        UPLOADFREQUENCY = 60 * 3  # every 3 minutes
        if tar:
            print("WARNING: tar depricated")
            uploadCommand = """\
tar czf {id}.tar.gz jobs experimentOutputs compressor_* patch && \
scp -o StrictHostKeyChecking=no \
{id}.tar.gz {upload}""".format(id=job_id, upload=upload)
        else:
            uploadCommand = """\
rsync  -e 'ssh  -o StrictHostKeyChecking=no' -avz \
jobs experimentOutputs {}""".format(upload)
        preamble += """
mv ~/.ssh/%s ~/.ssh/id_rsa
mv ~/.ssh/%s.pub ~/.ssh/id_rsa.pub
chmod 600 ~/.ssh/id_rsa
chmod 600 ~/.ssh/id_rsa.pub
bash -c "while sleep %d; do %s; done" &> /tmp/test.txt & 
UPLOADPID=$!
""" % (ssh_key, ssh_key, UPLOADFREQUENCY, uploadCommand)
    
    if arguments.gpuImage:
        preamble += """
source ~/.bashrc
python -c 'import torch; print(torch.cuda.is_available())'
"""

    preamble += """
singularity exec container.img make clean
singularity exec container.img make
"""

    script = preamble + script

    if upload:
        script += """
kill -9 $UPLOADPID
%s
""" % (uploadCommand)
    if shutdown:
        script += """
sudo shutdown -h now
"""

    fd = tempfile.NamedTemporaryFile(mode='w', delete=False, dir="/tmp")
    fd.write(script)
    fd.close()
    name = fd.name

    print("SCRIPT:")
    print(script)

    # Copy over the script
    print("Copying script over to", address)
    scp(address, name, "~/script.sh")

    # delete local copy
    os.system("rm %s" % name)

    # Send keys
    if upload:
        print("Uploading your ssh identity")
        scp(address, f"~/.ssh/{ssh_key}", f"~/.ssh/{ssh_key}")
        scp(address, f"~/.ssh/{ssh_key}.pub", f"~/.ssh/{ssh_key}.pub")

    # Send git patch
    print("Sending git patch over to", address)
    os.system("git diff --stat")
    ssh(address, "cat > ~/patch",
        pipeIn=f"""(echo "Base-Ref: $(git rev-parse origin/{br})" ; echo ; git diff --binary origin/{br})""")

    # Execute the script
    # For some reason you need to pipe the output to /dev/null in order to get
    # it to detach
    ssh(address, "bash ./script.sh > /dev/null 2>&1 &")
    print("Executing script on remote host.")

def launchExperiment(
        name,
        command,
        checkpoint=None,
        tail=False,
        resume="",
        upload=None,
        ssh_key="id_rsa",
        tar=False,
        shutdown=True,
        size="t2.micro",
        seed=None):
    job_id = "{}_{}_{}".format(name, user(), datetime.now().strftime("%FT%T"))
    job_id = job_id.replace(":", ".")
    if upload is None and shutdown:
        print("You didn't specify an upload host, and also specify that the machine should shut down afterwards. These options are incompatible because this would mean that you couldn't get the experiment outputs.")
        sys.exit(1)

    if resume and "resume" not in command:
        print("You said to resume, but didn't give --resume to your python command. I am assuming this is a mistake.")
        sys.exit(1)
    if resume and not resume.endswith(".tar.gz"):
        print("Invalid tarball for resume.")
        sys.exit(1)

    command = "singularity exec %s container.img %s"%(
        "--nv" if arguments.gpuImage else "",
        command)
    script = """
%s > jobs/%s 2>&1
""" % (command, job_id)

    def get_seed(command):
        try:
            seed = command.split("seed")[-1].strip()
            return seed
        except:
            return None
    
    seed = get_seed(command)
    tag = "" if seed is None else seed
    name = f"{name}_{tag}" # Distinguish replications.

    print(f"###########Now launching job: {name}\nCommand: {command} \nOutputs will be uploaded to {upload}.")

    if arguments.google:
        name = job_id
        instance, address = launchGoogleCloud(size, name)
    elif arguments.azure:
        instance, address = launchAzureCloud(size, name=name,region=arguments.azure_region)
    else:
        instance, address = launchAmazonCloud(size, name=name)
    time.sleep(120)
    if checkpoint is not None:
        sendCheckpoint(address, checkpoint)
    sendCommand(
        address,
        script,
        job_id,
        upload,
        ssh_key,
        resume,
        tar,
        shutdown,
        checkpoint=checkpoint)
    if tail:
        ssh(address, f""" \
                    mkdir -p ec/jobs && \
                    touch ec/jobs/{job_id} && \
                    tail -f -n+0 ec/jobs/{job_id} \
""")


if __name__ == "__main__":
    import argparse
    parser = argparse.ArgumentParser(description="")
    parser.add_argument('-u', "--upload",
                        default={
                            "ellisk": "ellisk@openmind7.mit.edu:/om2/user/ellisk/ec",
                            "lucasem": "lucasem@rig.lucasem.com:repo/ec",
                            "mnye": "mnye@openmind7.mit.edu:/om/user/mnye/ec_aws_logs",
                            "catwong": "zyzzyva@openmind7.mit.edu:/om2/user/zyzzyva/ec"
                        }.get(user(), None))
    parser.add_argument('-z', "--size",
                        default="t2.micro")
    parser.add_argument("--tail",
                        default=False,
                        help="attach to the machine and tail ec's output.",
                        action="store_true")
    parser.add_argument("--resume", metavar="TAR", type=str,
                        help="send tarball to resume checkpoint.")
    parser.add_argument("--checkpoint", metavar="checkpoint", type=str,
                        help="Send checkpoint file to resume checkpoint.")
    parser.add_argument('-k', "--shutdown",
                        default=False,
                        action="store_true")
    parser.add_argument('-c', "--google",
                        default=False,
                        action="store_true")
    parser.add_argument("--azure_region",
                        default=AZURE_DEFAULT_REGION,
                        help="Which region to launch in.")
    parser.add_argument("--azure",
                        default=False,
                        action="store_true")
    parser.add_argument('-g', "--gpuImage", default=False, action='store_true')
    parser.add_argument(
        '-t',
        "--tar",
        default=False,
        help="if uploading, this sends a single tarball with relevant outputs.",
        action="store_true")
    parser.add_argument("--ssh_key", default='id_rsa', help="Name of local RSA key file for openmind.")
    parser.add_argument("name")
    parser.add_argument("command")
    arguments = parser.parse_args()
    

    launchExperiment(arguments.name,
                     arguments.command,
                     shutdown=arguments.shutdown,
                     tail=arguments.tail,
                     resume=arguments.resume,
                     size=arguments.size,
                     upload=arguments.upload,
                     ssh_key=arguments.ssh_key,
                     tar=arguments.tar,
                     checkpoint=arguments.checkpoint)

"""
BILLING: https://console.aws.amazon.com/billing/home?#/
Do not go over $10k
t2.nano	1	Variable	0.5	EBS Only	$0.0058 per Hour
t2.micro	1	Variable	1	EBS Only	$0.0116 per Hour
t2.small	1	Variable	2	EBS Only	$0.023 per Hour
t2.medium	2	Variable	4	EBS Only	$0.0464 per Hour
t2.large	2	Variable	8	EBS Only	$0.0928 per Hour
t2.xlarge	4	Variable	16	EBS Only	$0.1856 per Hour
t2.2xlarge	8	Variable	32	EBS Only	$0.3712 per Hour
m4.large	2	6.5	8	EBS Only	$0.1 per Hour
m4.xlarge	4	13	16	EBS Only	$0.2 per Hour
m4.2xlarge	8	26	32	EBS Only	$0.4 per Hour
m4.4xlarge	16	53.5	64	EBS Only	$0.8 per Hour
m4.10xlarge	40	124.5	160	EBS Only	$2 per Hour
m4.16xlarge	64	188	256	EBS Only	$3.2 per Hour
Compute Optimized - Current Generation
c4.large	2	8	3.75	EBS Only	$0.1 per Hour
c4.xlarge	4	16	7.5	EBS Only	$0.199 per Hour
c4.2xlarge	8	31	15	EBS Only	$0.398 per Hour
c4.4xlarge	16	62	30	EBS Only	$0.796 per Hour
c4.8xlarge	36	132	60	EBS Only	$1.591 per Hour
GPU Instances - Current Generation
p2.xlarge	4	12	61	EBS Only	$0.9 per Hour
p2.8xlarge	32	94	488	EBS Only	$7.2 per Hour
p2.16xlarge	64	188	732	EBS Only	$14.4 per Hour
p3.2xlarge	8	23.5	61	EBS Only	$3.06 per Hour
p3.8xlarge	32	94	244	EBS Only	$12.24 per Hour
p3.16xlarge	64	188	488	EBS Only	$24.48 per Hour
g3.4xlarge	16	47	122	EBS Only	$1.14 per Hour
g3.8xlarge	32	94	244	EBS Only	$2.28 per Hour
g3.16xlarge	64	188	488	EBS Only	$4.56 per Hour
Memory Optimized - Current Generation
x1.16xlarge	64	174.5	976	1 x 1920 SSD	$6.669 per Hour
x1.32xlarge	128	349	1952	2 x 1920 SSD	$13.338 per Hour
r3.large	2	6.5	15	1 x 32 SSD	$0.166 per Hour
r3.xlarge	4	13	30.5	1 x 80 SSD	$0.333 per Hour
r3.2xlarge	8	26	61	1 x 160 SSD	$0.665 per Hour
r3.4xlarge	16	52	122	1 x 320 SSD	$1.33 per Hour
r3.8xlarge	32	104	244	2 x 320 SSD	$2.66 per Hour
r4.large	2	7	15.25	EBS Only	$0.133 per Hour
r4.xlarge	4	13.5	30.5	EBS Only	$0.266 per Hour
r4.2xlarge	8	27	61	EBS Only	$0.532 per Hour
r4.4xlarge	16	53	122	EBS Only	$1.064 per Hour
r4.8xlarge	32	99	244	EBS Only	$2.128 per Hour
r4.16xlarge	64	195	488	EBS Only	$4.256 per Hour
Storage Optimized - Current Generation
i3.large	2	7	15.25	1 x 475 NVMe SSD	$0.156 per Hour
i3.xlarge	4	13	30.5	1 x 950 NVMe SSD	$0.312 per Hour
i3.2xlarge	8	27	61	1 x 1900 NVMe SSD	$0.624 per Hour
i3.4xlarge	16	53	122	2 x 1900 NVMe SSD	$1.248 per Hour
i3.8xlarge	32	99	244	4 x 1900 NVMe SSD	$2.496 per Hour
i3.16xlarge	64	200	488	8 x 1900 NVMe SSD	$4.992 per Hour
h1.2xlarge	8	26	32	1 x 2000 HDD	$0.55 per Hour
h1.4xlarge	16	53.5	64	2 x 2000 HDD	$1.1 per Hour
h1.8xlarge	32	99	128	4 x 2000 HDD	$2.2 per Hour
h1.16xlarge	64	188	256	8 x 2000 HDD	$4.4 per Hour
d2.xlarge	4	14	30.5	3 x 2000 HDD	$0.69 per Hour
d2.2xlarge	8	28	61	6 x 2000 HDD	$1.38 per Hour
d2.4xlarge	16	56	122	12 x 2000 HDD	$2.76 per Hour
d2.8xlarge	36	116	244	24 x 2000 HDD	$5.52 per Hour
p3.16xlarge
"""
