# Supplementary material
Source: ML conference proceedings conference paper supplement (https://proceedings.neurips.cc/paper_files/paper/2022/hash/0113ef4642264adc2e6924a3cbbdf532-Abstract.html)
Supplement: Supplementary file 1 [file 0113ef4642264adc2e6924a3cbbdf532-Supplemental-Conference.zip › neurips_supplementary_cameraready/ec-master/bin/taskRankGraphs.py]

"""
Creates graphs for task re-ranking metrics from an ECResults checkpoint.
Requires metrics to be available in a recognitionTaskMetrics dict: you can specify this via --storeTaskMetrics.
Or you can attempt to back add them using the --addTaskMetrics function.

Usage: Example script is in taskRankGraphs.

Note: this requires a container with sklearn installed. A sample container is available in /om2/user/zyzzyva/ec/sklearn-container.img
"""

try:
    import binutil  # required to import from dreamcoder modules
except ModuleNotFoundError:
    import bin.binutil  # alt import if called as module

from dreamcoder.dreamcoder import *
import dill
import numpy as np
import matplotlib
matplotlib.use('Agg')
import matplotlib.pyplot as plot
from matplotlib.offsetbox import OffsetImage, AnnotationBbox
from dreamcoder.utilities import *
import matplotlib
plot.style.use('seaborn-whitegrid')
import matplotlib.colors as colors
import matplotlib.cm as cm

import itertools

np.set_printoptions(threshold=np.inf) #Print full arrays for debugging

from scipy.stats import entropy
from sklearn import mixture
from sklearn import preprocessing
from sklearn.metrics.cluster import adjusted_rand_score
from sklearn.metrics.pairwise import cosine_similarity
from sklearn.manifold import MDS, TSNE
from sklearn.cluster import AgglomerativeClustering

def loadfun(x):
        with open(x, 'rb') as handle:
                result = dill.load(handle)
        return result

class Bunch(object):
        def __init__(self, d):
                self.__dict__.update(d)

        def __setitem__(self, key, item):
                self.__dict__[key] = item

        def __getitem__(self, key):
                return self.__dict__[key]

relu = 'relu'
tanh = 'tanh'
sigmoid = 'sigmoid'
DeepFeatureExtractor = 'DeepFeatureExtractor'
LearnedFeatureExtractor = 'LearnedFeatureExtractor'
TowerFeatureExtractor = 'TowerFeatureExtractor'

weightMetrics = ['auxiliaryPrimitiveEmbeddings']
metricToHeldout = {
        'startProductions': 'heldoutStartProductions',
        'taskAuxiliaryLossLayer' : 'heldoutAuxiliaryLossLayer',
        'taskLogProductions' : 'heldoutTaskLogProductions',
        'contextualLogProductions' : 'heldoutTaskLogProductions'
}

listTasks={
"add-k" : "Apply math operator",
"append": "Extend list",
"bool-identify": "Check condition",
"caesar-cipher": "Caesar cipher",
"count-k" : "Check condition",
"drop-k" : "Other",
"has" : "Check condition",
"index-k" : "Index",
"is" : "Check condition",
"keep" : "Filter",
"kth-":"Filter",
"modulo-k" : "Apply math operator",
"mult-k" : "Apply math operator",
"prepend" : "Extend list",
"remove" : "Filter",
"rotate-k" : "Rotate",
"slice-k-n": "Slice",
"take": "Filter",
"evens" : "Filter",
"odds" : "Filter",
"Misc" : "Other"
}

towerTasks=[
        ("spaced", "Other"),
        ("on top of", "Other"),
        ("of arch 1", "Bridge"),
        ("brick", "Brick wall"),
        ("bridge", "Building"),
        ("aqueduct", "Building"),
        ("staircase", "Staircase"),
        ("arch 1/2 pyramid", "Staggered Pyramid"),
        ("arch pyramid", "Stacked Pyramid"),
        ("arch stack", "Other"),
        ("arch", "Arch"),
        ("Other", "Other"),
]
logoTasks=[
        ("next to", "Other"),
        ("row of squares", "Square"),
        ("4-gon", "Square"),
        ("row of ", "Translational symmetry"),
        ("sequence", "Other"),
        ("-gon", "Polygon"),
        ("star 3", "Polygon"),
        ("square", "Square"),
        ("smooth spiral", "Spiral"),
    ("spiral snowflake", "Spiral"),
        ("Greek", "Spiral"),
    ("double dashed", "Crosshair"),
        ("-dashed snowflake", "Crosshair"),
    ("circle flower", "Circle"),
    ("flower", "Flower"),
    ("leaf iteration 2.2", "Flower"),
        ("snowflake", "Radial symmetry (other)"),
        ("star", "Star"),
        ("semicircle", "Semicircle"),
        ("circle", "Circle"),
        ("Other", "Other"),
        ("2x2 grid", "Square")
]
labeledLogos = {"smooth spiral 3","smooth spiral 4",
                "star 5", "star 7",
                "7-gon 1l", "6-gon (*d 1d 2)",
                "5-gon 1l", "3-gon 1l", "3-gon (*d 1l 2)",
                "6-gon 1l", "5-gon (*d 1d 2)",
                "6-empty snowflake",
                "3-semicircle snowflake",
                "right semicircle of size 6",
                "left semicircle of size 5",
                "Greek spiral slanted by 2pi/6", "Greek spiral 8",
                "row of 5 dashes", "row of 6 semicircles",
                "row of 3 circles",
                "6-lonely circle snowflake",
#               "5-concentric squares",
                "staircase 5",
                "2-semicircle sequence L=2"
}


textTasks = [
"Abbreviate separate words",
"Abbreviate words separated by",
"Append '",
"Append 2 strings",
"Append two words",
"Drop last",
"Extract word delimited by",
"First letters of words",
"Prepend",
"Replace",
"Take first",
"Take last",
"ensure suffix",
"nth",
"parentheses around",
"drop first word delimited"
]

textTaskPrettyNames = [
"Abbreviate words",
"Abbreviate delimited words",
"Append string",
"Append 2 strings",
"Append delimited words",
"Drop characters",
"Extract word",
"First letters of words",
"Prepend",
"Replace",
"Take first",
"Take last",
"Check suffix",
"nth word",
"Add parentheses",
"Drop first delimited word"
]

def parseResultsPath(p):
        def maybe_eval(s):
                try:
                        return eval(s)
                except BaseException:
                        return s

        p = os.path.basename(p)
        p = p[:p.rfind('.')]
        domain = p[:p.index('_')]
        rest = p.split('_')[1:]
        if rest[-1] == "baselines":
                rest.pop()
        parameters = {ECResult.parameterOfAbbreviation(k): maybe_eval(v)
                                  for binding in rest if '=' in binding
                                  for [k, v] in [binding.split('=')]}
        parameters['domain'] = domain
        return Bunch(parameters)

def loadResult(path, export=None):
        result = loadfun(path)
        # print("loaded path:", path)
        if not hasattr(result, "recognitionTaskMetrics"):
                print("No recognitionTaskMetrics found, aborting.")
                assert False

        domain = parseResultsPath(path)['domain']
        iterations = parseResultsPath(path)['iterations'] 
        recognitionTaskMetrics = result.recognitionTaskMetrics

        # Create a folder for the domain if it does not exist.
        if export:
                if not os.path.exists(os.path.join(export, domain)):
                        os.makedirs(os.path.join(export, domain))
                
        return result, domain, iterations, recognitionTaskMetrics

def softmax(x):
        """Compute softmax values for each sets of scores in x."""
        return np.exp(x) / np.sum(np.exp(x))

def normalizeAndEntropy(x):
        return entropy(softmax(x))

def exportTaskTimes(
        resultPaths,
        experimentNames,
        timesArg,
        export):
        """Exports the task time information to the output file"""
        for j, path in enumerate(resultPaths):
                print("Logging result: " + path)
                result, domain, iterations, recognitionTaskMetrics = loadResult(path, export)
                enumerationTimeout = result.parameters['enumerationTimeout'] 

                # Get all the times.
                tasks = [t for t in recognitionTaskMetrics if timesArg in recognitionTaskMetrics[t]]
                taskTimes = [recognitionTaskMetrics[t][timesArg] for t in tasks]

                solvedTaskTimes = [time for time in taskTimes if time is not None ]
                # Replace the Nones with enumeration timeout for the purpose of this.
                taskTimes = [time if time is not None else enumerationTimeout for time in taskTimes]
                taskNames=[t.name for t in tasks]


                # Log Results.
                print("Solved tasks: " + str(len(solvedTaskTimes)))
                print ("Total tasks this round: " + str(len(taskTimes)))
                print("Average solve time (secs): " + str(np.mean(solvedTaskTimes)))
                print("Total time spent solving tasks (secs): " + str(np.sum(taskTimes)))

                for i, name in enumerate(taskNames):
                        print("TASK: " + name + " TIME: " + str(taskTimes[i]))


def plotTimeMetrics(
        resultPaths,
        experimentNames,
        outlierThreshold,
        metricsToPlot,
        timesArg,
        export=None):
        """Plots task times vs. the desired metrics (ie. entropy) for each checkpoint iteration."""


        for j, path in enumerate(resultPaths):
                result, domain, iterations, recognitionTaskMetrics = loadResult(path, export)

                if experimentNames is None:
                        experimentName = "none"
                else:
                        experimentName = experimentNames[j]

                # Get all the times.
                tasks = [t for t in recognitionTaskMetrics if timesArg in recognitionTaskMetrics[t]]
                taskTimes = [recognitionTaskMetrics[t][timesArg] for t in tasks]
                # Replace the Nones with -1 for the purpose of this.
                taskTimes = [time if time is not None else -1.0 for time in taskTimes]
                taskNames=[t.name for t in tasks]

                for k, metricToPlot in enumerate(metricsToPlot):
                        print("Plotting metric: " + metricToPlot)

                        taskMetrics = [recognitionTaskMetrics[t][metricToPlot] for t in tasks]

                        if outlierThreshold:
                                # Threshold to only outlierThreshold stddeviations from the median
                                ceiling = outlierThreshold
                                noOutliersNames, noOutliersTimes, noOutliersMetrics = [], [], []
                                for t in range(len(taskTimes)):
                                        if taskTimes[t] < ceiling:
                                                noOutliersTimes.append(taskTimes[t])
                                                noOutliersMetrics.append(taskMetrics[t])
                                                noOutliersNames.append(taskNames[t])
                                taskNames, taskTimes, taskMetrics = noOutliersNames, noOutliersTimes, noOutliersMetrics

                        if outlierThreshold:
                                xlabel = ('Recognition Best Times, Outlier Threshold: %d' % (outlierThreshold))
                        else:
                                xlabel = ('Recognition Best Times')
                        title = ("Experiment: %s Domain: %s, Iteration: %d" % (experimentName, domain, iterations))
                        ylabel = metricToPlot
                        export_name = experimentName + metricToPlot + "_iters_" + str(iterations) + "outlier_threshold_" + str(outlierThreshold) + "_time_plot.png"

                        plot.scatter(taskTimes, taskMetrics)
                        plot.xlabel(xlabel)
                        plot.ylabel(ylabel)
                        plot.title(title)
                        plot.savefig(os.path.join(export, domain, export_name))

                        print("Plotted metric without labels.")

                        # Also try plotting with labels.
                        times_and_metrics = np.column_stack((taskTimes, taskMetrics))
                        plotEmbeddingWithLabels(
                                times_and_metrics,
                                taskNames,
                                title,
                                os.path.join(export, domain, "labels_" + export_name),
                                xlabel,
                                ylabel)

                        print("Plotted metric with labels.")
        return


def scatterPlotSimilarities(x, y, exportPath, xlabel=None, ylabel=None):
        plot.figure(figsize=(20,20))
        plot.scatter(x, y)
        if xlabel:
                plot.xlabel(xlabel)
        if ylabel:
                plot.ylabel(ylabel)
        plot.savefig(exportPath)
        return


def plotEmbeddingWithLabels(embeddings, labels, title, exportPath, xlabel=None, ylabel=None, colorLabeling=None):
        plot.figure(figsize=(10,10))
        # Color map based on ordering of the labels.
        cmap = matplotlib.cm.get_cmap('tab20')
        normalize = matplotlib.colors.Normalize(vmin=0, vmax=len(labels))
        colors = [cmap(normalize(value)) for value in range(len(labels))]

        plot.figure(figsize=(10,10))
        plot.tick_params(axis='both', left='off', top='off', right='off', bottom='off', labelleft='off', labeltop='off', labelright='off', labelbottom='off')
        plot.grid(False)

        if colorLabeling is 'text':
                colorLabels = textNamesToLabels(labels)
                import matplotlib.patches as mpatches
                patches = [mpatches.Patch(color=cmap(i), label=textTaskPrettyNames[i]) for i in range(len(textTaskPrettyNames))]
                legend=plot.legend(handles=patches, frameon=True, loc='upper center', bbox_to_anchor=(0.5, -0.02),
          ncol=5)
                plot.title("Text Processing", fontsize=20)
        if colorLabeling is 'list':
                cmap = matplotlib.cm.get_cmap('tab10')
                prettyNames = sorted(list(set(listTasks.values())))
                colorLabels = listNamesToLabels(labels)
                import matplotlib.patches as mpatches
                patches = [mpatches.Patch(color=cmap(i), label=prettyNames[i]) for i in range(len(prettyNames))]
                legend=plot.legend(handles=patches, frameon=True, loc='upper center', bbox_to_anchor=(0.5, -0.02),
          ncol=4, fontsize=15)
                plot.title("List Processing", fontsize=15)


        for i, label in enumerate(labels):
                x, y = embeddings[i, 0], embeddings[i, 1]
                        
                if colorLabeling is "text" or colorLabeling is "list":
                        plot.scatter(x,y, color=cmap(colorLabels[i]), s=150, alpha=0.85)
                else:
                        plot.scatter(x,y, color=colors[i], s=500)

                if colorLabeling is "text" or colorLabeling is "list":
                        pass
                else:
                        plot.text(x+0.02, y+0.02, label, fontsize=20)
                        plot.title(title)
        if xlabel:
                plot.xlabel(xlabel)
        if ylabel:
                plot.ylabel(ylabel)


        print("Exporting: " + exportPath)
        if colorLabeling is "text" or colorLabeling is "list":
                plot.savefig(exportPath, bbox_extra_artists=(legend,), bbox_inches='tight')
        else:
                plot.savefig(exportPath)

        return

def plotLabeledImages(embeddings, images, labels, title, exportPath, xlabel=None, ylabel=None, colorLabeling=None):
        plot.figure(figsize=(10,10))
        plot.tick_params(axis='both', left='off', top='off', right='off', bottom='off', labelleft='off', labeltop='off', labelright='off', labelbottom='off')
        plot.grid(False)

        print("warning: only works for logo/towers")
        if "tower" in title:
                plot.title("Tower Building", fontsize=15)
                nameMapping = towerTasks
                zoom = 0.5
        else:
                plot.title("LOGO/Turtle Graphics", fontsize=15)
                nameMapping = logoTasks
                zoom = 0.5
        if arguments.programColors:
            nameMapping = PROGRAM_CLUSTERING            

               
        prettyNames = sorted(list({pretty for _,pretty in nameMapping}))
        colorLabels = logo_tower_NamesToLabels(labels, nameMapping)
        # remove tasks for which we do not have a label
        embeddings = np.array([embeddings[ti] for ti in range(embeddings.shape[0]) if colorLabels[ti] is not None ])
        labels = [l for ti,l in enumerate(labels) if colorLabels[ti] is not None ]
        images = [i for ti,i in enumerate(images) if colorLabels[ti] is not None ]
        colorLabels = [cl for ti,cl in enumerate(colorLabels) if colorLabels[ti] is not None ]

        if len(prettyNames) <= 10:
            cmap = matplotlib.cm.get_cmap('tab10')
            colors = [cmap(i) for i in range(len(prettyNames)) ]
        elif len(prettyNames) <= 20:
            cmap = matplotlib.cm.get_cmap('tab20')
            colors = [cmap(i) for i in (list(range(0,22,2))+list(range(1,22,2)))[:len(prettyNames)] ]
        else:
            assert False, "I don't know what colormap to use when you have more than twenty clusters!"
            
        
        import matplotlib.patches as mpatches
        patches = [mpatches.Patch(color=colors[i], label=prettyNames[i]) for i in range(len(prettyNames))]
        legend=plot.legend(handles=patches, frameon=True, loc='upper center', bbox_to_anchor=(0.5, -0.02),
  ncol=1, fontsize=15)

        def trimImage(image):
                image = 255. - image[:,:,0]
                while image[0,:].sum() == 0.: image = image[1:,:]
                while image[-1,:].sum() == 0.: image = image[:-1,:]
                while image[:,0].sum() == 0.: image = image[:,1:]
                while image[:,-1].sum() == 0.: image = image[:,:-1]

                Alpha = 255*(image > 0)
                return np.dstack([255. - image]*3 + [Alpha])
        def projectColor(c,i):
                i = 1. - i/255.
                # image is now white on black
                i = i[:,:,:-1]
                for index, coefficient in enumerate(c):
                        if index < 3: i[:,:,index]*=coefficient
                a = (i.sum(2) > 0.)*0.6
                return np.dstack([i] + [a])
                
        imageLabels = [] # [(x,y,image)]
        initialDisplacements = []
        for i, label in enumerate(labels):
                x, y = embeddings[i, 0], embeddings[i, 1]
                plot.scatter(x,y, color=cmap(colorLabels[i]/cmap.N), s=10000, alpha=0.00001)
                name = labels[i]
                c = colors[colorLabels[i]]
                
                imageLabels.append((x,y,projectColor(c,trimImage(images[i]))))
        for index, (x,y,i) in enumerate(imageLabels):
                ab = AnnotationBbox(OffsetImage(i, zoom=zoom),
                                    (x,y),
                                    xycoords='data',
                                    frameon=False)
                plot.gca().add_artist(ab)

                
        if xlabel:
                plot.xlabel(xlabel)
        if ylabel:
                plot.ylabel(ylabel)


        print("Exporting: " + exportPath)
        plot.savefig(exportPath, bbox_extra_artists=(legend,), bbox_inches='tight')
        #os.system("feh %s"%exportPath)
        
        return


def plotEmbeddingWithImages(embeddings, images, taskNames, title, exportPath, xlabel=None, ylabel=None, image_zoom=1):
        """
        Plots embeddings with thumbnail images.
        Reference: https://www.kaggle.com/gaborvecsei/plants-t-sne
        """
        fig, ax = plot.subplots(figsize=(10,10))
        plot.tick_params(axis='both', left='off', top='off', right='off', bottom='off', labelleft='off', labeltop='off', labelright='off', labelbottom='off')
        plot.grid(False)
        artists = []
        for xy, i in zip(embeddings, images):
                x0, y0 = xy
                img = OffsetImage(i, zoom=0.5)
                ab = AnnotationBbox(img, (x0, y0), xycoords='data', frameon=False)
                artists.append(ax.add_artist(ab))

        ax.update_datalim(embeddings)
        ax.autoscale()

        plot.title(title, fontsize=15)
        if xlabel:
                plot.xlabel(xlabel)
        if ylabel:
                plot.ylabel(ylabel)
        print("Saving to: " + exportPath)
        plot.savefig(exportPath)
        return

def makeLogoImage(im):
        im = np.reshape(np.array(im),(128, 128))
        # Make black and white.
        black_mask = im != 0
        white_mask = im == 0
        im[black_mask] = 0
        im[white_mask] = 255

        alpha = np.zeros(im.shape)
        alpha[black_mask] = 255
        # Need to make it the opposite for alpha.
        im = np.dstack([im, im, im, alpha])
        return im

def makeTowerImage(im, labelsAndImages):
        # remove the floor
        im = im[:-2,:,:]
        if labelsAndImages:
                # Make monochromatic
                im[im[:,:,1] > 0] = 0
                im[im[:,:,0] > 0] = 1
        w = im.shape[0]
        h = im.shape[1]

        # Set the black pixels to transparent.
        black_mask = im[:, :, 0] == 0
        alpha = np.ones((w,h)) * 255
        alpha[black_mask] = 0
        if labelsAndImages: im *= 255
        im = np.dstack([im, alpha])
        if labelsAndImages: # trim
                w = 3
                k = np.ones((w,w,w))/4.
                im = growImage(im, iterations=2)
                while im[0,:,-1].sum() == 0.: im = im[1:,:,:]
                while im[-1,:,-1].sum() == 0.: im = im[:-1,:,:]
                while im[:,0,-1].sum() == 0.: im = im[:,1:,:]
                while im[:,-1,-1].sum() == 0.: im = im[:,:-1,:]
                im[:,:,:-1] = 255 - im[:,:,:-1]
                
        return im

def makeRationalImage(im):
        im = np.reshape(np.array(im),(64, 64))
        # Make black and white.
        black_mask = im != 0
        white_mask = im == 0
        im[black_mask] = 0
        im[white_mask] = 255

        alpha = np.zeros(im.shape)
        alpha[black_mask] = 255
        # Need to make it the opposite for alpha.
        im = np.dstack([im, im, im, alpha])
        return im

def frontierMetric(frontiers):
        primitives = {p
                          for f in frontiers
                          for e in f.entries
                          for p in [e.program]
                          if p.isInvented}
        g = Grammar.uniform(primitives)
        return [f.expectedProductionUses(g) for f in frontiers]

def printTaskExamples(taskType, task):
        print(task.name)
        for example in task.examples:
                if taskType == 'text':
                        print("%s -> %s" % ("".join(example[0][0]), "".join(example[1])))
                if taskType == 'list':
                        print("%s -> %s" % (str(example[0][0]), str(example[1])))
                else:
                        print(example)
        print('\n')

def formattedName(metricToCluster, item):
        if metricToCluster in weightMetrics or isinstance(item, Program):
                raw_name = str(item)
        else:
                raw_name = item.name

        # Replace lambda instances.
        raw_name = raw_name.replace(u'lambda', u'λ')
        if(len(raw_name)) > 100:
                return raw_name[:50] + "\n" + raw_name[50:]
        else:
                return raw_name

def random_restart_tsne(X, perplexity, lr, restarts=30):
    with timing(f"did {restarts} random restarts"):
        best = None
        for _ in range(restarts):
            tsne = TSNE(random_state=0, perplexity=perplexity, learning_rate=lr, n_iter=10000)
            projection = tsne.fit_transform(X)
            if best is None or best[0] > tsne.kl_divergence_:
                best = (tsne.kl_divergence_, projection)
    return best[1]

def plotTSNE(resultPaths,
             experimentNames,
             metricsToCluster,
             applySoftmax,
             tsneLearningRate,
             tsnePerplexity,
             labelWithImages,
             labelsAndImages,
             export=None,
             title=None,
             printExamples=None):
        """Plots TSNE clusters of the given metrics. Requires Sklearn."""

        from sklearn.manifold import TSNE

        if metricsToCluster is None:
                return

        for j, path in enumerate(resultPaths):
                result, domain, iterations, recognitionTaskMetrics = loadResult(path, export)
                if experimentNames is None:
                        experimentName = "none"
                else:
                        experimentName = experimentNames[j%len(experimentNames)]

                for k, metricToCluster in enumerate(metricsToCluster):
                        print("Clustering metric: " + metricToCluster )
                        taskNames, taskMetrics = [], []

                        for task in sorted(recognitionTaskMetrics.keys(), key=lambda task : formattedName(metricToCluster, task)):
                                if metricToCluster in recognitionTaskMetrics[task]:
                                        if printExamples:
                                                printTaskExamples(printExamples, task)

                                        if recognitionTaskMetrics[task][metricToCluster] is not None:
                                                taskNames.append(formattedName(metricToCluster, task))  
                                                taskMetrics.append(recognitionTaskMetrics[task][metricToCluster])
                        if metricToCluster == 'frontier':
                                taskMetrics = [f.expectedProductionUses(result.grammars[-1])
                                                   for f in taskMetrics] 

                        if len(taskMetrics) == 0:
                                print(f"Got no task metrics - skipping {metricToCluster}/{iterations}")
                                continue
                        
                        print("Clustering %d tasks with embeddings of shape: %s" % (len(taskMetrics), str(taskMetrics[0].shape)) )
                        if taskMetrics[0].shape[0] == 0:
                                print(f"Task metrics have zero dimensionality - skipping {metricToCluster}/{iterations}")
                                continue
                        
                        if applySoftmax:
                                print("Applying softmax.")
                                taskMetrics = [softmax(metric) for metric in taskMetrics]
                        taskNames = np.array(taskNames)
                        taskMetrics = np.array(taskMetrics)
                        metricNorms = (taskMetrics*taskMetrics).sum(1)**0.5
                        taskMetrics = taskMetrics/np.reshape(metricNorms, (metricNorms.shape[0], 1))
                        print(taskNames.shape, taskMetrics.shape)
                        
                        clusteredTaskMetrics = random_restart_tsne(taskMetrics,
                                                                   perplexity=tsnePerplexity,
                                                                   lr=tsneLearningRate,
                                                                   restarts=10)
                        title = title or ("Metric: %s, Domain: %s, Experiment: %s, Iteration: %d" % (metricToCluster, domain, experimentName, iterations))

                        if labelWithImages or labelsAndImages:
                                images = {}
                                for i, task in enumerate(sorted(filter(lambda mt: isinstance(mt, Task), recognitionTaskMetrics.keys()), key=lambda task : task.name)): # Enumerate in same order as sorted tasks.
                                        if domain == 'tower':
                                                recognitionTaskMetrics[task]['taskImages'] = task.getImage(pretty=not labelsAndImages)
                                        if 'taskImages' not in recognitionTaskMetrics[task] and domain == 'rational': recognitionTaskMetrics[task]['taskImages'] = task.features
                                        if 'taskImages' not in recognitionTaskMetrics[task] and domain == 'logo': recognitionTaskMetrics[task]['taskImages'] = task.highresolution
                                        im = np.array(recognitionTaskMetrics[task]['taskImages'])
                                        if domain == 'logo':
                                                im = makeLogoImage(im)
                                        elif domain == 'tower':
                                                im = makeTowerImage(im, labelsAndImages)
                                        elif domain == 'rational':
                                                im = makeRationalImage(im)
                                        images[task.name] = im
                                if not labelsAndImages:
                                        plotEmbeddingWithImages(clusteredTaskMetrics, 
                                                                [images[n] for n in taskNames] ,
                                                                taskNames,
                                                title, 
                                                os.path.join(export, domain, experimentName + metricToCluster + "_iters_" + str(iterations) + "_tsne_images.png"))
                                else:
                                        plotLabeledImages(clusteredTaskMetrics, 
                                                          [images[n] for n in taskNames],
                                                          taskNames,
                                                          title, 
                                                          os.path.join(export, domain, experimentName + metricToCluster + "_iters_" + str(iterations) + "_tsne_labeledimages.png"),
                                        )
                                        
                        else:
                                plotEmbeddingWithLabels(clusteredTaskMetrics, 
                                        taskNames, 
                                        title, 
                                        os.path.join(export, domain, experimentName + metricToCluster + "_iters_" + str(iterations) + "_tsne_labels.png"))

def invMap(curr_map):
                inv_map = {}
                for k, v in curr_map.items():
                        inv_map[v] = inv_map.get(v, [])
                        inv_map[v].append(k)
                return inv_map

def getGroundTruthStarts(groundTruthCheckpoints):
        """Ground truth starts: the start production for the top-ranked frontier in the test and train task solutions."""
        def getFrontierStart(frontiers):
                # Get the top programs
                topEntry = sorted(frontiers.entries, key=lambda e:e.logLikelihood, reverse=True)[0]
                p = topEntry.program
                while p.isAbstraction: p = p.body
                while p.isApplication: p = p.f
                return p

        frontierStarts = []
        for j, path in enumerate(groundTruthCheckpoints):
                        result, domain, iterations, recognitionTaskMetrics = loadResult(path)
                        # Solved training tasks.
                        taskSolutions = result.taskSolutions
                        trainToStarts= {task: getFrontierStart(frontiers) for task, frontiers in taskSolutions.items() if len(frontiers) > 0}
                        startToTrains = invMap(trainToStarts)

                        # Solved testing tasks.
                        testToStarts={}
                        for task in sorted(recognitionTaskMetrics.keys(), key=lambda task : formattedName('frontier', task)):
                                if 'frontier'in recognitionTaskMetrics[task] and task not in trainToStarts:
                                        if len(recognitionTaskMetrics[task]['frontier']) > 0:
                                                testToStarts[task] = getFrontierStart(recognitionTaskMetrics[task]['frontier'])
                        startToTests = invMap(testToStarts)
                        frontierStarts.append([trainToStarts, startToTrains, testToStarts, startToTests])
        return frontierStarts

def DPGMM(metricsDict, groundTruths):
        if len(metricsDict) < 1:
                return (None, None, None)
        taskMetrics = np.array([metricsDict[task] for task in metricsDict.keys()])
        metricNorms = (taskMetrics*taskMetrics).sum(1)**0.5
        taskMetrics = taskMetrics/np.reshape(metricNorms, (metricNorms.shape[0], 1))
        dpgmm = mixture.BayesianGaussianMixture(n_components=len(groundTruths),
                                                                   covariance_type='full').fit(taskMetrics)
        clusters = dpgmm.predict(taskMetrics)
        taskToCluster = {}
        for j, task in enumerate(metricsDict.keys()):
                taskToCluster[task] = clusters[j]
        clusterToTasks = invMap(taskToCluster)
        return (metricsDict.keys(), clusters, taskToCluster)

def getExpectedProductionUses(checkpoints, groundTruthStarts):
        """Extract out the predicted productions from the recognition model for the ground truth start tasks."""
        allEPs = []
        for j, path in enumerate(checkpoints):
                result, domain, iterations, recognitionTaskMetrics = loadResult(path)
                trainToStarts, startToTrains, testToStarts, startToTests = groundTruthStarts[j]

                trainExpectedProductions = {}
                testExpectedProductions = {}
                for task in sorted(recognitionTaskMetrics.keys(), key=lambda task : formattedName('frontier', task)):

                        if 'expectedProductionUses'in recognitionTaskMetrics[task]:
                                trainExpectedProductions[task] = recognitionTaskMetrics[task]['expectedProductionUses']
                        elif 'frontier'in recognitionTaskMetrics[task] and task in testToStarts:
                                testExpectedProductions[task] = recognitionTaskMetrics[task]['frontier'].expectedProductionUses(result.grammars[-1])

                allEPs.append([DPGMM(trainExpectedProductions, startToTrains), DPGMM(testExpectedProductions, startToTests)])
        return allEPs


def getSimilarities(rawMetrics, applySoftmax):
        """Assumes a dict from task: metric vector."""
        if len(rawMetrics) < 1:
                return None
        taskMetrics = np.array(rawMetrics)
        # metricNorms = (taskMetrics*taskMetrics).sum(1)**0.5
        # taskMetrics = taskMetrics/np.reshape(metricNorms, (metricNorms.shape[0], 1))

        sim = cosine_similarity(taskMetrics, taskMetrics)
        np.fill_diagonal(sim, 0)

        # if applySoftmax:
        #       # Normalize the rows of the matrix.
        #       sim = np.apply_along_axis(softmax, 1, sim)

        # Normalize the matrix rows.

        return sim
        
def plotHeatMap(cm, classes,
                                                  title='Confusion matrix',
                                                  cmap=plot.cm.Blues,
                                                  exportPath=None):
        """
        This function prints and plots the confusion matrix.
        Normalization can be applied by setting `normalize=True`.
        """
        plot.figure(figsize=(20,20))

        plot.imshow(cm, interpolation='nearest', cmap=cmap)
        plot.title(title)
        tick_marks = np.arange(len(classes))
        plot.xticks(tick_marks, classes, rotation=90, fontsize=8)
        plot.yticks(tick_marks, classes, fontsize=8)

        print("Saving to: " + exportPath)
        plot.savefig(exportPath)
        return


def getClusterIntersections(allMetricClusters):
        def getIntersections(keys, taskToClusters):
                intersections = []
                for (task1, task2) in itertools.combinations(keys, 2):
                        isSame = True
                        for clusterDict in taskToClusters:
                                if task1 in clusterDict and task2 in clusterDict:
                                        if clusterDict[task1] != clusterDict[task2]:
                                                isSame = False
                        if isSame:
                                shouldAppend=True
                                for j, intersection in enumerate(intersections):
                                        if task1.name in intersection or task2.name in intersection:
                                                shouldAppend=False
                                                intersections[j].union((task1.name, task2.name))
                                                break
                                if shouldAppend:
                                        intersections.append(set((task1.name, task2.name)))
                print(intersections)
                assert False

        (trainKeys, _, _), (testKeys, _, _) = allMetricClusters[0]
        trainTaskToClusters = [trainDict for (trainKeys, _, trainDict), (testKeys, _, testDict) in allMetricClusters]
        testTaskToClusters = [testDict for (trainKeys, _, trainDict), (testKeys, _, testDict) in allMetricClusters]
        print("Train intersections:")
        getIntersections(trainKeys, trainTaskToClusters)
        if len(testKeys) > 0:
                getIntersections(testKeys, testTaskToClusters)


def clusteringAnalysis(
        checkpoints,
        groundTruthCheckpoints,
        clusteringMetrics,
        compareToGroundTruthStarts,
        compareToExpectedProductionUses,
        clusteringMethod='dpgmm',
        min_k=1,
        max_k=None,
        export=None):
        """Clustering analysis on the results of a given metric. 

        If more than one checkpoint is provided, also calculates sets of tasks that appeared in the same cluster amongst the checkpoints 
        by the size of the set and the number of checkpoints that grouped the same set into the same cluster.
        Exports a pickle file with the results.
        """
        print("Clustering on: %d checkpoints" % len(checkpoints))
        # Extract out the ground truth starts for the frontiers.
        groundTruthStarts = getGroundTruthStarts(groundTruthCheckpoints)

        if compareToExpectedProductionUses:
                groundTruthEPs = getExpectedProductionUses(groundTruthCheckpoints, groundTruthStarts)

        for metric in clusteringMetrics:
                if metric in metricToHeldout:
                        heldoutMetric = metricToHeldout[metric]
                else:
                        heldoutMetric = "None"
                print("Clustering on metric: " + metric + " heldoutMetric: " + metricToHeldout[metric]) 
                allMetricClusters = []
                for j, path in enumerate(checkpoints):
                        result, domain, iterations, recognitionTaskMetrics = loadResult(path)
                        trainToStarts, startToTrains, testToStarts, startToTests = groundTruthStarts[j]
                        
                        trainMetrics, testMetrics = {}, {}
                        for task in sorted(recognitionTaskMetrics.keys(), key=lambda task : formattedName('frontier', task)):
                                if metric in recognitionTaskMetrics[task] and task in trainToStarts:
                                        trainMetrics[task] = recognitionTaskMetrics[task][metric]
                                elif heldoutMetric in recognitionTaskMetrics[task] and task in testToStarts:
                                        testMetrics[task] = recognitionTaskMetrics[task][heldoutMetric]

                        if trainMetrics.keys() != trainToStarts.keys():
                                print("WARNING: TRAIN KEYS DO NOT MATCH GROUND TRUTH.")
                                print(path)
                        if testMetrics.keys() != testToStarts.keys():   
                                print("WARNING: TEST KEYS DO NOT MATCH GROUND TRUTH.")

                        allMetricClusters.append([DPGMM(trainMetrics, startToTrains), DPGMM(testMetrics, startToTests)])

                # Compare to ground truth
                if compareToGroundTruthStarts:
                        groundTruthStartsRITrain, groundTruthStartsRITest = [], []
                        for j, path in enumerate(checkpoints):
                                trainToStarts, startToTrains, testToStarts, startToTests = groundTruthStarts[j]
                                (_, trainLabels, _), (_, testLabels, _) = allMetricClusters[j]
                                # Convert labels to numerical labels
                                trainGroundTruthLabels = preprocessing.LabelEncoder().fit_transform([str(val) for val in trainToStarts.values()])
                                groundTruthStartsRITrain.append(adjusted_rand_score(trainGroundTruthLabels, trainLabels))

                                if testLabels:
                                        testGroundTruthLabels = preprocessing.LabelEncoder().fit_transform([str(val) for val in testToStarts.values()])
                                        groundTruthStartsRITest.append(adjusted_rand_score(testGroundTruthLabels, testLabels))

                        print("Comparison to ground truth starts RI train: %s" % str(groundTruthStartsRITrain))
                        print("Comparison to ground truth starts RI test: %s" % str(groundTruthStartsRITest))

                # Compare to expected production
                if compareToExpectedProductionUses:
                        groundTruthEPTrain, groundTruthEPTest = [], []
                        for j, path in enumerate(checkpoints):
                                (_, trainTrueLabels, _), (_, testTrueLabels, _) = groundTruthEPs[j]
                                (_, trainLabels, _), (_, testLabels, _) = allMetricClusters[j]
                                groundTruthEPTrain.append(adjusted_rand_score(trainTrueLabels, trainLabels))
                                if testLabels:
                                        groundTruthEPTest.append(adjusted_rand_score(testTrueLabels, testLabels))
                        print("Comparison to ground truth EP RI train: %s" % str(groundTruthEPTrain))
                        print("Comparison to ground truth EP RI test: %s" % str(groundTruthEPTest))

                # Compare to each other to find agreed upon sets
                getClusterIntersections(allMetricClusters)

def getMDSOrdering(expectedProductionUses):
        embedding = MDS(random_state=0, n_components=1)
        X_transformed = embedding.fit_transform(expectedProductionUses)
        ordering = np.argsort(np.squeeze(X_transformed))
        return ordering

def getExpectedProductionSimilarities(checkpoints, ordering, applySoftmax):
        allEPs = []
        for j, path in enumerate(checkpoints):
                result, domain, iterations, recognitionTaskMetrics = loadResult(path)
                # Solved training tasks.
                trainTasks = [task for task, frontiers in result.taskSolutions.items() if len(frontiers) > 0]
                trainNames, trainExpected = [], []
                testNames, testExpected = [], []
                for task in sorted(recognitionTaskMetrics.keys(), key=lambda task : formattedName('frontier', task)):
                        if 'expectedProductionUses'in recognitionTaskMetrics[task]:
                                trainNames.append(formattedName('frontier', task)) 
                                trainExpected.append(recognitionTaskMetrics[task]['expectedProductionUses'])
                        elif 'frontier'in recognitionTaskMetrics[task] and task not in trainTasks:
                                testNames.append(formattedName('frontier', task)) 
                                testExpected.append(recognitionTaskMetrics[task]['frontier'].expectedProductionUses(result.grammars[-1]))

                trainNames, trainExpected, testNames, testExpected = np.array(trainNames), np.array(trainExpected), np.array(testNames), np.array(testExpected)
                if ordering == 'MDS':
                        print("Fitting an MDS ordering.")
                        # Fit an MDS to one component and use to sort.
                        trainOrdering, testOrdering = getMDSOrdering(trainExpected), getMDSOrdering(testExpected)
                        trainNames, trainExpected, testNames, testExpected = trainNames[trainOrdering], trainExpected[trainOrdering], testNames[testOrdering], testExpected[testOrdering]


                allEPs.append([(trainNames, trainExpected, getSimilarities(trainExpected, applySoftmax)), (testNames, testExpected, getSimilarities(testExpected, applySoftmax))])

                print("Found %d ground truth train and %d test." %(len(trainExpected), len(testExpected)))
        return allEPs

def getSimilarityMetrics(similarityMetric, recognitionTaskMetrics, trainNames, testNames, applySoftmax):
        newRecognitionMetrics = {formattedName('frontier', task) : value for task, value in recognitionTaskMetrics.items()}
        trainMetrics = [newRecognitionMetrics[taskName][similarityMetric] for taskName in trainNames if similarityMetric in newRecognitionMetrics[taskName] ] 
        testMetrics = []
        if similarityMetric in metricToHeldout:
                heldoutMetric = metricToHeldout[similarityMetric]
                testMetrics = [newRecognitionMetrics[taskName][heldoutMetric] for taskName in testNames if heldoutMetric in newRecognitionMetrics[taskName] ]
        if applySoftmax:
                trainMetrics = [softmax(trainMetric) for trainMetric in trainMetrics]
                testMetrics = [softmax(testMetric) for testMetric in testMetrics]
        return (trainMetrics, getSimilarities(trainMetrics, applySoftmax)), (testMetrics, getSimilarities(testMetrics, applySoftmax))

def meanCorrelation(pk,qk):
        correlations = []
        for i in range(pk.shape[0]):
                correlations.append(np.correlate(pk[i,], qk[i,]))

        return np.mean(correlations)


def groundTruthStartsToLabels(taskToStarts, taskNames):
        newTaskToStarts = {formattedName('frontier', task) : str(value) for task, value in taskToStarts.items()}
        taskStarts = [newTaskToStarts[name] for name in taskNames]
        # Fit label encoder to the all of the starts, then encode the taskNames.
        le = preprocessing.LabelEncoder()

        le.fit(list(newTaskToStarts.values()))
        return le.transform(taskStarts)

def textNamesToLabels(textNames):
        labels = []
        for name in textNames:
                foundName = False
                for j, label in enumerate(textTasks):
                        if label in name:
                                labels.append(j)
                                foundName = True
                                break
                if not foundName:
                        print(name)
        return labels

def listNamesToLabels(listNames):
        labels = []
        for name in listNames:
                foundName = False
                for label in listTasks.keys():
                        if label in name:
                                labels.append(listTasks[label])
                                foundName = True
                                break
                if not foundName:
                        labels.append("Other")
                        print(name)

        # Assign to list
        prettyNames = sorted(list(set(listTasks.values())))

        labels = [prettyNames.index(label) for label in labels]
        return labels

def logoNamesToLabels(listNames):
        labels = []
        for name in listNames:
                foundName = False
                for label,pretty in logoTasks:
                        if label in name:
                                labels.append(pretty)
                                foundName = True
                                break
                if not foundName:
                        labels.append("Other")
                print("%s{0:20}%s"%(name,labels[-1]))
        # Assign to list
        prettyNames = sorted(list({pretty for _,pretty in logoTasks}))

        labels = [prettyNames.index(label) for label in labels]
        return labels

def logo_tower_NamesToLabels(listNames, nameMapping):
    labels = []
    for name in listNames:
        foundName = False
        for label,pretty in nameMapping:
            if (arguments.programColors is None and label in name) or \
               (arguments.programColors is not None and label == name):
                labels.append(pretty)
                foundName = True
                break
        if not foundName:
            labels.append("Other")
        print("%s\t%s"%(name,labels[-1]))
    # Assign to list
    prettyNames = sorted(list({pretty for _,pretty in nameMapping}))

    labels = [prettyNames.index(label) if label in prettyNames else None
              for label in labels]
    return labels

def getTopNMostSimilar(names, sims, topN):
        sortedSims=np.dstack(np.unravel_index(np.argsort(-sims.ravel()), sims.shape)).squeeze()
        for n in range(topN):
                first, second = sortedSims[n]
                print(names[first], names[second])

def getTaskSimilarities(taskName, names, sims, trueSims, recognitionTaskMetrics, exportPath, topN=5):
        names_array = np.array(names)
        mostSimilar = []
        for j, name in enumerate(names):
                if taskName in name:
                        print(name)
                        mostSimilar.append(name)

                        top = np.argsort(-sims[j])[:topN]
                        mostSimilarNames = names_array[top]
                        print("Most similar: %s" % str(mostSimilarNames))
                        
                        print("Mean similarity here: %f " % np.mean(sims[j][top]))
                        meanTrueSimilarity = np.mean(trueSims[j][top])
                        print("Top similarity in ground truth: %f" % meanTrueSimilarity)

                        mostSimilar += list(mostSimilarNames)

        saveImageMontage(mostSimilar, recognitionTaskMetrics, exportPath)

def gallery(array, ncols=6):
    nindex, height, width, intensity = array.shape
    nrows = nindex//ncols
    assert nindex == nrows*ncols
    # want result.shape = (height*nrows, width*ncols, intensity)
    result = (array.reshape(nrows, ncols, height, width, intensity)
              .swapaxes(1,2)
              .reshape(height*nrows, width*ncols, intensity))
    return result

def saveImageMontage(taskNames, recognitionTaskMetrics, exportPath):
        newRecognitionMetrics = {formattedName('frontier', task) : value for task, value in recognitionTaskMetrics.items()}
        images = [makeLogoImage(np.array(newRecognitionMetrics[task]['taskImages'])) for task in taskNames]
        result = gallery(np.array(images))
        print("Saving to: " + exportPath)
        plot.figure(figsize=(20,20))
        plot.axis('off')
        plot.imshow(result) 
        plot.savefig(exportPath)


def similarityAnalysis(
        checkpoints,
        groundTruthCheckpoints,
        experimentNames,
        similarityMetrics,
        applySoftmax,
        similarityWithTSNE,
        ordering=None,
        exportPath=None):
        """Create similarity matrices for the given metric and compare similarities of pairs with the ground truth."""
        groundTruthSimilarities = getExpectedProductionSimilarities(groundTruthCheckpoints, ordering, applySoftmax)
        groundTruthStarts = getGroundTruthStarts(groundTruthCheckpoints)

        # Create similarity matrices for each of the metrics.
        for j, path in enumerate(checkpoints):
                result, domain, iterations, recognitionTaskMetrics = loadResult(path)
                ((trainNames, trainExpected, trainTruthSims), (testNames, testExpected, testTruthSims)) = groundTruthSimilarities[j]
                trainToStarts, startToTrains, testToStarts, startToTests = groundTruthStarts[j]
                # trainColorLabeling = groundTruthStartsToLabels(trainToStarts, trainNames)
                testColorLabeling = groundTruthStartsToLabels(testToStarts, testNames)

                for similarityMetric in similarityMetrics:
                        (trainMetrics, trainMetricSims), (testMetrics, testMetricSims) = getSimilarityMetrics(similarityMetric, recognitionTaskMetrics, trainNames, testNames, applySoftmax) 

                        # # # Save the metric similarity matrices.
                        # plotHeatMap(trainMetricSims, trainNames, exportPath=os.path.join(exportPath, experimentNames[j] +"_it_%d_%s_train_similarities.png" % (iterations, similarityMetric)))
                        # # scatterPlotSimilarities(trainTruthSims.flatten(), trainMetricSims.flatten(), exportPath=os.path.join(exportPath, experimentNames[j] +"_it_%d_%s_train_scatter.png" % (iterations, similarityMetric)), xlabel="Expected Production Uses", ylabel=similarityMetric)
                        
                        # if testMetrics:
                        #       plotHeatMap(testMetricSims, testNames, exportPath=os.path.join(exportPath, experimentNames[j] +"_it_%d_%s_test_similarities.png" % (iterations, similarityMetric)))
                        #       # scatterPlotSimilarities(testTruthSims.flatten(), testMetricSims.flatten(), exportPath=os.path.join(exportPath, experimentNames[j] +"_it_%d_%s_test_scatter.png" % (iterations, similarityMetric)), xlabel="Expected Production Uses", ylabel=similarityMetric)

                        if similarityWithTSNE:
                                # Also do TSNE with the given ordering.
                                tsne = TSNE(random_state=0, perplexity=30, learning_rate=400, n_iter=10000)
                                clusteredTrainMetrics = tsne.fit_transform(trainMetrics)
                                plotEmbeddingWithLabels(clusteredTrainMetrics, 
                                        trainNames, 
                                        similarityMetric, 
                                        os.path.join(exportPath, experimentNames[j] +"_it_%d_%s_train_tsne.png" % (iterations, similarityMetric)),
                                        colorLabeling="list")
                        #       if testMetrics:
                        #               clusteredTestMetrics = tsne.fit_transform(testMetrics)
                        #               plotEmbeddingWithLabels(clusteredTestMetrics, 
                        #                       testNames, 
                        #                       similarityMetric, 
                        #                       os.path.join(exportPath, experimentNames[j] +"_it_%d_%s_test_tsne.png" % (iterations, similarityMetric)),
                        #                       colorLabeling="text")


                        # # getTaskSimilarities('Greek spiral', trainNames, trainMetricSims, trainTruthSims, 
                        # #     recognitionTaskMetrics,
                        # #     exportPath=os.path.join(exportPath, experimentNames[j] +"_it_%d_%s_train_mostSimilar.png" % (iterations, similarityMetric)))


                        # from sklearn.metrics import mean_squared_error
                        # from scipy.stats import pearsonr
                        # from numpy import corrcoef
                
                        # print("Experiment train: %s, it=%s, metric %s, mse %f, corr %s" % (experimentNames[j], iterations, similarityMetric, mean_squared_error(trainTruthSims, trainMetricSims), str(pearsonr(trainTruthSims.flatten(), trainMetricSims.flatten())) ))
                        # getTopNMostSimilar(trainNames, trainMetricSims, topN=20)
                        # if testMetrics:
                        #       print("Experiment test: %s, it=%s, metric %s, mse %f , corr %s" % (experimentNames[j], iterations, similarityMetric, mean_squared_error(testTruthSims, testMetricSims), str(pearsonr(testTruthSims.flatten(), testMetricSims.flatten())) ))
                        #       getTopNMostSimilar(testNames, testMetricSims, topN=20)
                # Sanity check clustering
                # if similarityWithTSNE:
                #       tsne = TSNE(random_state=0, perplexity=15, learning_rate=300, n_iter=10000)
                #       clusteredGTMetrics = tsne.fit_transform(trainExpected)
                #       plotEmbeddingWithLabels(clusteredGTMetrics, 
                #                       trainNames, 
                #                       "Expected Productions", 
                #                       os.path.join(exportPath, experimentNames[j] + "_gt_train_tsne.png"),
                #                       colorLabeling="list")
                #       if testMetrics:
                #               clusteredGTMetrics = tsne.fit_transform(testExpected)
                #               plotEmbeddingWithLabels(clusteredGTMetrics, 
                #                               testNames, 
                #                               "Expected Productions", 
                #                               os.path.join(exportPath, experimentNames[j] + "_gt_test_tsne.png"),
                #                               colorLabeling=testColorLabeling)


PROGRAM_CLUSTERING = None
def clusterPrograms(checkpoint, distanceThreshold=3.):
    global PROGRAM_CLUSTERING
    PROGRAM_CLUSTERING = []
    checkpoint = loadfun(checkpoint)
    n = 0
    for t,metrics in checkpoint.recognitionTaskMetrics.items():
        if not isinstance(t,Task): continue
        n += 1
    g = checkpoint.grammars[-1]

    data = [(t.name, metrics['frontier'].expectedProductionUses(g))
            for t,metrics in checkpoint.recognitionTaskMetrics.items()
            if isinstance(t,Task) and 'frontier' in metrics]

    names = [n for n,_ in data ]
    X = np.array([x for _,x in data ])
    clustering = AgglomerativeClustering(linkage = "ward", n_clusters = None, distance_threshold = distanceThreshold).fit(X)
    clusters = {}
    for label, name in zip(clustering.labels_,names):
        clusters[label] = clusters.get(label,[]) + [name]
        PROGRAM_CLUSTERING.append((name, label))
    print("Discovered",len(clusters),"distinct clusters in program space")
            
        

    

if __name__ == "__main__":

        import argparse

        parser = argparse.ArgumentParser(description = "")
        parser.add_argument("--checkpoints",nargs='+')
        parser.add_argument ("--experimentNames", nargs='+', type=str, default=None)
        parser.add_argument("--metricsToPlot", nargs='+',type=str)
        parser.add_argument("--times", type=str, default='recognitionBestTimes')
        parser.add_argument("--exportTaskTimes", type=bool)
        parser.add_argument("--outlierThreshold", type=float, default=None)

        #TSNE 
        parser.add_argument("--metricsToCluster", nargs='+', type=str, default=None)
        parser.add_argument("--tsneLearningRate", type=float, default=250.0)
        parser.add_argument("--tsnePerplexity", type=float, default=30.0)
        parser.add_argument("--labelWithImages", type=bool, default=None)
        parser.add_argument("--labelsAndImages", default=False, action="store_true")
        parser.add_argument('--printExamples', type=str, default=None)
        parser.add_argument('--applySoftmax',  default=False, action="store_true")

        # Clustering analysis
        parser.add_argument("--clusteringAnalysisMetrics", nargs='+', type=str, default=None)
        parser.add_argument("--groundTruthCheckpoints", nargs='+', default=None)
        parser.add_argument("--clusteringMethod", type=str, default='dpgmm')
        parser.add_argument("--compareToGroundTruthStarts", default=False, action='store_true')
        parser.add_argument("--compareToExpectedProductionUses", default=False, action='store_true')

        # Similarity matrix analysis
        parser.add_argument("--similarityAnalysisMetrics", nargs='+', type=str, default=None)
        parser.add_argument("--similarityOrdering", type=str, default=None)
        parser.add_argument("--similarityWithTSNE", default=False, action="store_true")

        # agglomerate clustering of program features
        parser.add_argument("--programColors", type=str, default=None,
                            help="Get ground truth coloring by clustering program back-of-word features from this checkpoint")
        parser.add_argument("--distanceThreshold", type=float, default=3.)

        parser.add_argument("--export","-e",
                                                type=str, default='data')
        parser.add_argument("--title",default=None, type=str)

        arguments = parser.parse_args()

        if arguments.programColors:
            clusterPrograms(arguments.programColors, arguments.distanceThreshold)

        if arguments.similarityAnalysisMetrics:
                similarityAnalysis(arguments.checkpoints,
                                                        arguments.groundTruthCheckpoints,
                                                        arguments.experimentNames,
                                                        arguments.similarityAnalysisMetrics,
                                                        arguments.applySoftmax,
                                                        arguments.similarityWithTSNE,
                                                        ordering=arguments.similarityOrdering,
                                                        exportPath=arguments.export)


        if arguments.clusteringAnalysisMetrics:
                clusteringAnalysis(arguments.checkpoints,
                                                        arguments.groundTruthCheckpoints,
                                                        arguments.clusteringAnalysisMetrics,
                                                        arguments.compareToGroundTruthStarts,
                                                        arguments.compareToExpectedProductionUses)

        if arguments.exportTaskTimes:
                exportTaskTimes(arguments.checkpoints,
                                                arguments.experimentNames,
                                                arguments.times,
                                                arguments.export)

        if arguments.metricsToPlot:
                plotTimeMetrics(arguments.checkpoints,
                                                arguments.experimentNames,
                                                arguments.outlierThreshold,
                                                arguments.metricsToPlot,
                                                arguments.times,
                                                arguments.export)

        if arguments.metricsToCluster:
                plotTSNE(arguments.checkpoints,
                         arguments.experimentNames,
                         arguments.metricsToCluster,
                         arguments.applySoftmax,
                         arguments.tsneLearningRate,
                         arguments.tsnePerplexity,
                         arguments.labelWithImages,
                         arguments.labelsAndImages,
                         arguments.export,
                         printExamples=arguments.printExamples,
                         title=arguments.title)
