# Supplementary material
Source: ML conference proceedings conference paper supplement (https://proceedings.neurips.cc/paper_files/paper/2022/hash/0113ef4642264adc2e6924a3cbbdf532-Abstract.html)
Supplement: Supplementary file 1 [file 0113ef4642264adc2e6924a3cbbdf532-Supplemental-Conference.zip › neurips_supplementary_cameraready/ec-master/dreamcoder/dreaming.py]

import json
import os
import subprocess

from dreamcoder.domains.arithmetic.arithmeticPrimitives import k1, k0, addition, subtraction, multiplication
from dreamcoder.frontier import Frontier, FrontierEntry
from dreamcoder.grammar import Grammar
from dreamcoder.program import Program
from dreamcoder.task import Task
from dreamcoder.type import arrow, tint
from dreamcoder.utilities import tuplify, timing, eprint, get_root_dir, mean


def helmholtzEnumeration(g, request, inputs, timeout, _=None,
                         special=None, evaluationTimeout=None):
    """Returns json (as text)"""
    message = {"request": request.json(),
               "timeout": timeout,
               "DSL": g.json(),
               "extras": inputs}
    if evaluationTimeout: message["evaluationTimeout"] = evaluationTimeout
    if special: message["special"] = special
    message = json.dumps(message)
    with open('/tmp/hm', 'w') as handle:
        handle.write(message)
    try:
        binary = os.path.join(get_root_dir(), 'helmholtz')
        process = subprocess.Popen(binary,
                                   stdin=subprocess.PIPE,
                                   stdout=subprocess.PIPE)
        response, error = process.communicate(bytes(message, encoding="utf-8"))
    except OSError as exc:
        raise exc
    return response


def backgroundHelmholtzEnumeration(tasks, g, timeout, _=None,
                                   special=None, evaluationTimeout=None):
    from pathos.multiprocessing import Pool
    requests = list({t.request for t in tasks})
    inputs = {r: list({tuplify(xs)
                       for t in tasks if t.request == r
                       for xs, y in t.examples})
              for r in requests}
    workers = Pool(len(requests))
    promises = [workers.apply_async(helmholtzEnumeration,
                                    args=(g, r, inputs[r], float(timeout)),
                                    kwds={'special': special,
                                          'evaluationTimeout': evaluationTimeout})
                for r in requests]

    def get():
        results = [p.get() for p in promises]
        frontiers = []
        with timing("(Helmholtz enumeration) Decoded json into frontiers"):
            for request, result in zip(requests, results):
                response = json.loads(result.decode("utf-8"))
                for b, entry in enumerate(response):
                    frontiers.append(Frontier([FrontierEntry(program=Program.parse(p),
                                                             logPrior=entry["ll"],
                                                             logLikelihood=0.)
                                               for p in entry["programs"]],
                                              task=Task(str(b),
                                                        request,
                                                        [])))
        eprint("Total number of Helmholtz frontiers:", len(frontiers))
        return frontiers

    return get


if __name__ == "__main__":
    from dreamcoder.recognition import RecognitionModel, DummyFeatureExtractor
    g = Grammar.uniform([k1, k0, addition, subtraction, multiplication])
    frontiers = helmholtzEnumeration(g,
                                     arrow(tint, tint),
                                     [[0], [1], [2]],
                                     10.)
    eprint("average frontier size", mean(len(f.entries) for f in frontiers))
    f = DummyFeatureExtractor([])
    r = RecognitionModel(f, g, hidden=[], contextual=True)
    r.trainBiasOptimal(frontiers, frontiers, steps=70)
    g = r.grammarOfTask(frontiers[0].task).untorch()
    frontiers = helmholtzEnumeration(g,
                                     arrow(tint, tint),
                                     [[0], [1], [2]],
                                     10.)
    for f in frontiers:
        eprint(f.summarizeFull())
    eprint("average frontier size", mean(len(f.entries) for f in frontiers))
