# Supplementary material
Source: ML conference proceedings conference paper supplement (https://proceedings.neurips.cc/paper_files/paper/2022/hash/0113ef4642264adc2e6924a3cbbdf532-Abstract.html)
Supplement: Supplementary file 1 [file 0113ef4642264adc2e6924a3cbbdf532-Supplemental-Conference.zip › neurips_supplementary_cameraready/ec-master/dreamcoder/ec.py]

print("DEPRECATION NOTICE: this module (dreamcoder.ec) will be deleted soon, "
      "please update your code to import from dreamcoder.dreamcoder instead")
from dreamcoder.dreamcoder import *  # noqa
