# Supplementary material
Source: ML conference proceedings conference paper supplement (https://proceedings.neurips.cc/paper_files/paper/2022/hash/0113ef4642264adc2e6924a3cbbdf532-Abstract.html)
Supplement: Supplementary file 1 [file 0113ef4642264adc2e6924a3cbbdf532-Supplemental-Conference.zip › neurips_supplementary_cameraready/ec-master/dreamcoder/fragmentUtilities.py]

from dreamcoder.type import *
from dreamcoder.program import *
from dreamcoder.frontier import *

from collections import Counter


class MatchFailure(Exception):
    pass


class Matcher(object):
    def __init__(self, context):
        self.context = context
        self.variableBindings = {}

    @staticmethod
    def match(context, fragment, expression, numberOfArguments):
        if not mightMatch(fragment, expression):
            raise MatchFailure()
        m = Matcher(context)
        tp = fragment.visit(m, expression, [], numberOfArguments)
        return m.context, tp, m.variableBindings

    def application(
            self,
            fragment,
            expression,
            environment,
            numberOfArguments):
        '''returns tp of fragment.'''
        if not isinstance(expression, Application):
            raise MatchFailure()

        ft = fragment.f.visit(
            self,
            expression.f,
            environment,
            numberOfArguments + 1)
        xt = fragment.x.visit(self, expression.x, environment, 0)

        self.context, returnType = self.context.makeVariable()
        try:
            self.context = self.context.unify(ft, arrow(xt, returnType))
        except UnificationFailure:
            raise MatchFailure()

        return returnType.apply(self.context)

    def index(self, fragment, expression, environment, numberOfArguments):
        # This is a bound variable
        surroundingAbstractions = len(environment)
        if fragment.bound(surroundingAbstractions):
            if expression == fragment:
                return environment[fragment.i].apply(self.context)
            else:
                raise MatchFailure()

        # This is a free variable
        i = fragment.i - surroundingAbstractions

        # Make sure that it doesn't refer to anything bound by a
        # lambda in the fragment. Otherwise it cannot be safely lifted
        # out of the fragment and preserve semantics
        for fv in expression.freeVariables():
            if fv < len(environment):
                raise MatchFailure()

        # The value is going to be lifted out of the fragment
        try:
            expression = expression.shift(-surroundingAbstractions)
        except ShiftFailure:
            raise MatchFailure()

        # Wrap it in the appropriate number of lambda expressions & applications
        # This is because everything has to be in eta-longform
        if numberOfArguments > 0:
            expression = expression.shift(numberOfArguments)
            for j in reversed(range(numberOfArguments)):
                expression = Application(expression, Index(j))
            for _ in range(numberOfArguments):
                expression = Abstraction(expression)

        # Added to the bindings
        if i in self.variableBindings:
            (tp, binding) = self.variableBindings[i]
            if binding != expression:
                raise MatchFailure()
        else:
            self.context, tp = self.context.makeVariable()
            self.variableBindings[i] = (tp, expression)
        return tp

    def abstraction(
            self,
            fragment,
            expression,
            environment,
            numberOfArguments):
        if not isinstance(expression, Abstraction):
            raise MatchFailure()

        self.context, argumentType = self.context.makeVariable()
        returnType = fragment.body.visit(
            self, expression.body, [argumentType] + environment, 0)

        return arrow(argumentType, returnType)

    def primitive(self, fragment, expression, environment, numberOfArguments):
        if fragment != expression:
            raise MatchFailure()
        self.context, tp = fragment.tp.instantiate(self.context)
        return tp

    def invented(self, fragment, expression, environment, numberOfArguments):
        if fragment != expression:
            raise MatchFailure()
        self.context, tp = fragment.tp.instantiate(self.context)
        return tp

    def fragmentVariable(
            self,
            fragment,
            expression,
            environment,
            numberOfArguments):
        raise Exception(
            'Deprecated: matching against fragment variables. Convert fragment to canonical form to get rid of fragment variables.')


def mightMatch(f, e, d=0):
    '''Checks whether fragment f might be able to match against expression e'''
    if f.isIndex:
        if f.bound(d):
            return f == e
        return True
    if f.isPrimitive or f.isInvented:
        return f == e
    if f.isAbstraction:
        return e.isAbstraction and mightMatch(f.body, e.body, d + 1)
    if f.isApplication:
        return e.isApplication and mightMatch(
            f.x, e.x, d) and mightMatch(
            f.f, e.f, d)
    assert False


def canonicalFragment(expression):
    '''
    Puts a fragment into a canonical form:
    1. removes all FragmentVariable's
    2. renames all free variables based on depth first traversal
    '''
    return expression.visit(CanonicalVisitor(), 0)


class CanonicalVisitor(object):
    def __init__(self):
        self.numberOfAbstractions = 0
        self.mapping = {}

    def fragmentVariable(self, e, d):
        self.numberOfAbstractions += 1
        return Index(self.numberOfAbstractions + d - 1)

    def primitive(self, e, d): return e

    def invented(self, e, d): return e

    def application(self, e, d):
        return Application(e.f.visit(self, d), e.x.visit(self, d))

    def abstraction(self, e, d):
        return Abstraction(e.body.visit(self, d + 1))

    def index(self, e, d):
        if e.bound(d):
            return e
        i = e.i - d
        if i in self.mapping:
            return Index(d + self.mapping[i])
        self.mapping[i] = self.numberOfAbstractions
        self.numberOfAbstractions += 1
        return Index(self.numberOfAbstractions - 1 + d)


def fragmentSize(f, boundVariableCost=0.1, freeVariableCost=0.01):
    freeVariables = 0
    leaves = 0
    boundVariables = 0
    for surroundingAbstractions, e in f.walk():
        if isinstance(e, (Primitive, Invented)):
            leaves += 1
        if isinstance(e, Index):
            if e.bound(surroundingAbstractions):
                boundVariables += 1
            else:
                freeVariables += 1
        assert not isinstance(e, FragmentVariable)
    return leaves + boundVariableCost * \
        boundVariables + freeVariableCost * freeVariables


def primitiveSize(e):
    if e.isInvented:
        e = e.body
    return fragmentSize(e)


def defragment(expression):
    '''Converts a fragment into an invented primitive'''
    if isinstance(expression, (Primitive, Invented)):
        return expression

    expression = canonicalFragment(expression)

    for _ in range(expression.numberOfFreeVariables):
        expression = Abstraction(expression)

    return Invented(expression)


class RewriteFragments(object):
    def __init__(self, fragment):
        self.fragment = fragment
        self.concrete = defragment(fragment)

    def tryRewrite(self, e, numberOfArguments):
        try:
            context, t, bindings = Matcher.match(
                Context.EMPTY, self.fragment, e, numberOfArguments)
        except MatchFailure:
            return None

        assert frozenset(bindings.keys()) == frozenset(range(len(bindings))),\
            "Perhaps the fragment is not in canonical form?"
        e = self.concrete
        for j in range(len(bindings) - 1, -1, -1):
            _, b = bindings[j]
            e = Application(e, b)
        return e

    def application(self, e, numberOfArguments):
        e = Application(e.f.visit(self, numberOfArguments + 1),
                        e.x.visit(self, 0))
        return self.tryRewrite(e, numberOfArguments) or e

    def index(self, e, numberOfArguments): return e

    def invented(self, e, numberOfArguments): return e

    def primitive(self, e, numberOfArguments): return e

    def abstraction(self, e, numberOfArguments):
        e = Abstraction(e.body.visit(self, 0))
        return self.tryRewrite(e, numberOfArguments) or e

    def rewrite(self, e): return e.visit(self, 0)

    @staticmethod
    def rewriteFrontier(frontier, fragment):
        worker = RewriteFragments(fragment)
        return Frontier([FrontierEntry(program=worker.rewrite(e.program),
                                       logLikelihood=e.logLikelihood,
                                       logPrior=e.logPrior,
                                       logPosterior=e.logPosterior)
                         for e in frontier],
                        task=frontier.task)


def proposeFragmentsFromFragment(f):
    '''Abstracts out repeated structure within a single fragment'''
    yield f
    freeVariables = f.numberOfFreeVariables
    closedSubtrees = Counter(
        subtree for _,
        subtree in f.walk() if not isinstance(
            subtree,
            Index) and subtree.closed)
    del closedSubtrees[f]
    for subtree, freq in closedSubtrees.items():
        if freq < 2:
            continue
        yield canonicalFragment(f.substitute(subtree, Index(freeVariables)))


def nontrivial(f):
    if not isinstance(f, Application):
        return False
    # Curry
    if isinstance(f.x, FragmentVariable):
        return False
    if isinstance(f.x, Index):
        # Make sure that the index is used somewhere else
        if not any(
                isinstance(
                    child,
                    Index) and child.i -
                surroundingAbstractions == f.x.i for surroundingAbstractions,
                child in f.f.walk()):
            return False

    numberOfHoles = 0
    numberOfVariables = 0
    numberOfPrimitives = 0
    for surroundingAbstractions, child in f.walk():
        if isinstance(child, (Primitive, Invented)):
            numberOfPrimitives += 1
        if isinstance(child, FragmentVariable):
            numberOfHoles += 1
        if isinstance(child, Index) and child.free(surroundingAbstractions):
            numberOfVariables += 1
    #eprint("Fragment %s has %d calls and %d variables and %d primitives"%(f,numberOfHoles,numberOfVariables,numberOfPrimitives))

    return numberOfPrimitives + 0.5 * \
        (numberOfHoles + numberOfVariables) > 1.5 and numberOfPrimitives >= 1


def violatesLaziness(fragment):
    """
    conditionals are lazy on the second and third arguments. this
    invariant must be maintained by learned fragments.
    """
    for surroundingAbstractions, child in fragment.walkUncurried():
        if not child.isApplication:
            continue
        f, xs = child.applicationParse()
        if not (f.isPrimitive and f.name == "if"):
            continue

        # curried conditionals always violate laziness
        if len(xs) != 3:
            return True

        # yes/no branches
        y = xs[1]
        n = xs[2]

        return \
            any(yc.isIndex and yc.i >= yd
                for yd, yc in y.walk(surroundingAbstractions)) or \
            any(nc.isIndex and nc.i >= nd
                for nd, nc in n.walk(surroundingAbstractions))

    return False


def proposeFragmentsFromProgram(p, arity):

    def fragment(expression, a, toplevel=True):
        """Generates fragments that unify with expression"""

        if a == 1:
            yield FragmentVariable.single
        if a == 0:
            yield expression
            return

        if isinstance(expression, Abstraction):
            # Symmetry breaking: (\x \y \z ... f(x,y,z,...)) defragments to be
            # the same as f(x,y,z,...)
            if not toplevel:
                for b in fragment(expression.body, a, toplevel=False):
                    yield Abstraction(b)
        elif isinstance(expression, Application):
            for fa in range(a + 1):
                for f in fragment(expression.f, fa, toplevel=False):
                    for x in fragment(expression.x, a - fa, toplevel=False):
                        yield Application(f, x)
        else:
            assert isinstance(expression, (Invented, Primitive, Index))

    def fragments(expression, a):
        """Generates fragments that unify with subexpressions of expression"""

        yield from fragment(expression, a)
        if isinstance(expression, Application):
            curry = True
            if curry:
                yield from fragments(expression.f, a)
                yield from fragments(expression.x, a)
            else:
                # Pretend that it is not curried
                function, arguments = expression.applicationParse()
                yield from fragments(function, a)
                for argument in arguments:
                    yield from fragments(argument, a)
        elif isinstance(expression, Abstraction):
            yield from fragments(expression.body, a)
        else:
            assert isinstance(expression, (Invented, Primitive, Index))

    return {canonicalFragment(f) for b in range(arity + 1)
            for f in fragments(p, b) if nontrivial(f)}


def proposeFragmentsFromFrontiers(frontiers, a, CPUs=1):
    fragmentsFromEachFrontier = parallelMap(
        CPUs, lambda frontier: {
            fp for entry in frontier.entries for f in proposeFragmentsFromProgram(
                entry.program, a) for fp in proposeFragmentsFromFragment(f)}, frontiers)
    allFragments = Counter(f for frontierFragments in fragmentsFromEachFrontier
                           for f in frontierFragments)
    return [fragment for fragment, frequency in allFragments.items()
            if frequency >= 2 and fragment.wellTyped() and nontrivial(fragment)]
