# Supplementary material
Source: ML conference proceedings conference paper supplement (https://proceedings.neurips.cc/paper_files/paper/2022/hash/0113ef4642264adc2e6924a3cbbdf532-Abstract.html)
Supplement: Supplementary file 1 [file 0113ef4642264adc2e6924a3cbbdf532-Supplemental-Conference.zip › neurips_supplementary_cameraready/ec-master/dreamcoder/utilities.py]

import inspect
import signal
import random
import time
import traceback
import sys
import os
import subprocess
import math
import pickle as pickle
from itertools import chain
import heapq

import hashlib

def computeMD5hash(my_string):
    #https://stackoverflow.com/questions/13259691/convert-string-to-md5
    m = hashlib.md5()
    m.update(my_string.encode('utf-8'))
    return m.hexdigest()


class Thunk(object):
    # A class for lazy evaluation
    def __init__(self, thing):
        self.thing = thing
        self.evaluated = False 

    def force(self):
        if self.evaluated:
            return self.thing
        else: 
            self.thing = self.thing()
            self.evaluated = True
            return self.thing

def cindex(i): return lambda a: a[i]

class ConstantFunction:
    def __init__(self,v): self.v = v
    def __call__(self,*a,**k): return self.v

def eprint(*args, **kwargs):
    print(*args, file=sys.stderr, **kwargs)
    flushEverything()


class Bunch(object):
    def __init__(self, d):
        self.__dict__.update(d)

    def __setitem__(self, key, item):
        self.__dict__[key] = item

    def __getitem__(self, key):
        return self.__dict__[key]

def curry(fn):
    """Curries a function. Hacky way to return a curried version of functions with arbitrary #s of args. """
    def make_curry_fn(signature):
        """Redefines a currying function with the appropriate arguments. Hacky."""
        tmp_curry = 'def tmp_curry(f): return ' 
        tmp_curry += " ".join(['lambda %s: ' % argname for argname in signature.parameters])
        tmp_curry += 'f'
        tmp_curry += str(signature)
        return tmp_curry
    exec(make_curry_fn(inspect.signature(fn)), globals())
    return tmp_curry(fn)

class Curried:
    def __init__(self, f, arguments=None, arity=None):
        if arity is None:
            arity = len(inspect.getargspec(f)[0])
        self.f = f
        self.arity = arity
        if arguments is None: arguments = []
        self.arguments = arguments

    def __call__(self, x):
        arguments = self.arguments + [x]
        if len(arguments) == self.arity:
            return self.f(*arguments)
        else:
            return Curried(self.f, arguments=arguments, arity=self.arity)

    def __str__(self):
        if len(self.arguments) == 0:
            return f"Curried({self.f}/{self.arity})"
        else:
            return f"Curried({self.f}/{self.arity}, {', '.join(map(str,self.arguments))})"

    def __repr__(self):
        return str(self)
            

def hashable(v):
    """Determine whether `v` can be hashed."""
    try:
        hash(v)
    except TypeError:
        return False
    return True


def flatten(x, abort=lambda x: False):
    """Recursively unroll iterables."""
    if abort(x):
        yield x
        return
    try:
        yield from chain(*(flatten(i, abort) for i in x))
    except TypeError:  # not iterable
        yield x

def growImage(i, iterations=2):
    import numpy as np
    for _ in range(iterations):
        ip = np.zeros(i.shape)
        # assume it is monochromatic and get the color
        c = np.array([i[:,:,j].max()
                      for j in range(4) ])
        # assume that the alpha channel indicates where the foreground is
        foreground = i[:,:,3] > 0
        foreground = foreground + \
                     np.pad(foreground, ((0,1),(0,0)), mode='constant')[1:,:] +\
                     np.pad(foreground, ((0,0),(0,1)), mode='constant')[:,1:] + \
                     np.pad(foreground, ((0,0),(1,0)), mode='constant')[:,:-1] + \
                     np.pad(foreground, ((1,0),(0,0)), mode='constant')[:-1,:]
        ip[foreground] = c
        i = ip
    return ip
                        
                

def summaryStatistics(n, times):
    if len(times) == 0:
        eprint(n, "no successful times to report statistics on!")
    else:
        eprint(n, "average: ", int(mean(times) + 0.5),
               "sec.\tmedian:", int(median(times) + 0.5),
               "\tmax:", int(max(times) + 0.5),
               "\tstandard deviation", int(standardDeviation(times) + 0.5))

def updateTaskSummaryMetrics(taskSummaryMetrics, newMetricsDict, key):
    """Updates a taskSummaryMetrics dict from tasks -> metrics with new metrics under the given key."""
    for task in newMetricsDict:
        if task in taskSummaryMetrics:
            taskSummaryMetrics[task][key] = newMetricsDict[task]
        else:
            taskSummaryMetrics[task] = {key : newMetricsDict[task]}

NEGATIVEINFINITY = float('-inf')
POSITIVEINFINITY = float('inf')

PARALLELMAPDATA = None
PARALLELBASESEED = None


def parallelMap(numberOfCPUs, f, *xs, chunksize=None, maxtasksperchild=None, memorySensitive=False,
                seedRandom=False):
    """seedRandom: Should each parallel worker be given a different random seed?"""
    global PARALLELMAPDATA
    global PARALLELBASESEED

    if memorySensitive:
        memoryUsage = getMemoryUsageFraction()/100.
        correctedCPUs = max(1,
                            min(int(0.9/memoryUsage),numberOfCPUs))
        assert correctedCPUs <= numberOfCPUs
        assert correctedCPUs >= 1
        if correctedCPUs < numberOfCPUs:
            eprint("In order to not use all of the memory on the machine (%f gb), we are limiting this parallel map to only use %d CPUs"%(howManyGigabytesOfMemory(),correctedCPUs))
        numberOfCPUs = correctedCPUs
        

    if numberOfCPUs == 1:
        return list(map(f, *xs))

    n = len(xs[0])
    for x in xs:
        assert len(x) == n

    assert PARALLELMAPDATA is None    
    PARALLELMAPDATA = (f, xs)
    assert PARALLELBASESEED is None
    if seedRandom:
        PARALLELBASESEED = random.random()

    from multiprocessing import Pool

    # Randomize the order in case easier ones come earlier or later
    permutation = list(range(n))
    random.shuffle(permutation)
    inversePermutation = dict(zip(permutation, range(n)))

    # Batch size of jobs as they are sent to processes
    if chunksize is None:
        chunksize = max(1, n // (numberOfCPUs * 2))
    pool = Pool(numberOfCPUs, maxtasksperchild=maxtasksperchild)
    ys = pool.map(parallelMapCallBack, permutation,
                  chunksize=chunksize)
    pool.terminate()

    PARALLELMAPDATA = None
    PARALLELBASESEED = None
    return [ys[inversePermutation[j]] for j in range(n)]


def parallelMapCallBack(j):
    global PARALLELMAPDATA
    global PARALLELBASESEED
    if PARALLELBASESEED is not None:
        random.seed(PARALLELBASESEED + j)
    f, xs = PARALLELMAPDATA
    try:
        return f(*[x[j] for x in xs])
    except Exception as e:
        eprint(
            "Exception in worker during lightweight parallel map:\n%s" %
            (traceback.format_exc()))
        raise e


def log(x):
    t = type(x)
    if t == int or t == float:
        if x == 0:
            return NEGATIVEINFINITY
        return math.log(x)
    return x.log()


def exp(x):
    t = type(x)
    if t == int or t == float:
        return math.exp(x)
    return x.exp()


def lse(x, y=None):
    if y is None:
        largest = None
        if len(x) == 0:
            raise Exception('LSE: Empty sequence')
        if len(x) == 1:
            return x[0]
        # If these are just numbers...
        t = type(x[0])
        if t == int or t == float:
            largest = max(*x)
            return largest + math.log(sum(math.exp(z - largest) for z in x))
        #added clause to avoid zero -dim tensor problem
        import torch
        if t == torch.Tensor and x[0].size() == torch.Size([]):
            return torchSoftMax([datum.view(1) for datum in x])
        # Must be torch
        return torchSoftMax(x)
    else:
        if x is NEGATIVEINFINITY:
            return y
        if y is NEGATIVEINFINITY:
            return x
        tx = type(x)
        ty = type(y)
        if (ty == int or ty == float) and (tx == int or tx == float):
            if x > y:
                return x + math.log(1. + math.exp(y - x))
            else:
                return y + math.log(1. + math.exp(x - y))
        return torchSoftMax(x, y)


def torchSoftMax(x, y=None):
    from torch.nn.functional import log_softmax
    import torch
    if y is None:
        if isinstance(x, list):
            x = torch.cat(x)
        return (x - log_softmax(x, dim=0))[0]
    x = torch.cat((x, y))
    # this is so stupid
    return (x - log_softmax(x, dim=0))[0]


def invalid(x):
    return math.isinf(x) or math.isnan(x)


def valid(x): return not invalid(x)


def forkCallBack(x):
    [f, a, k] = x
    try:
        return f(*a, **k)
    except Exception as e:
        eprint(
            "Exception in worker during forking:\n%s" %
            (traceback.format_exc()))
        raise e


def callFork(f, *arguments, **kw):
    """Forks a new process to execute the call. Blocks until the call completes."""
    global FORKPARAMETERS

    from multiprocessing import Pool

    workers = Pool(1)
    ys = workers.map(forkCallBack, [[f, arguments, kw]])
    workers.terminate()
    assert len(ys) == 1
    return ys[0]


PARALLELPROCESSDATA = None


def launchParallelProcess(f, *a, **k):
    global PARALLELPROCESSDATA

    PARALLELPROCESSDATA = [f, a, k]

    from multiprocessing import Process
    p = Process(target=_launchParallelProcess, args=tuple([]))
    p.start()
    PARALLELPROCESSDATA = None
    return p


def _launchParallelProcess():
    global PARALLELPROCESSDATA
    [f, a, k] = PARALLELPROCESSDATA
    try:
        f(*a, **k)
    except Exception as e:
        eprint(
            "Exception in worker during forking:\n%s" %
            (traceback.format_exc()))
        raise e


def jsonBinaryInvoke(binary, message):
    import json
    import subprocess
    import os

    message = json.dumps(message)
    try:
        process = subprocess.Popen(binary,
                                   stdin=subprocess.PIPE,
                                   stdout=subprocess.PIPE)
        response, error = process.communicate(bytes(message, encoding="utf-8"))
    except OSError as exc:
        raise exc
    try:
        response = json.loads(response.decode("utf-8"))
    except Exception as e:
        eprint("Could not parse json.")
        with open("/tmp/_message","w") as handle:
            handle.write(message)
        with open("/tmp/_response","w") as handle:
            handle.write(response.decode("utf-8"))
        raise e
    return response

    
class CompiledTimeout(Exception):
    pass


def get_root_dir():
    """
    Returns the absolute path to the root directory of the repository as a string.

    This method is primarily used in order to locate the binaries at the root of the
    repository.
    """
    return os.path.join(os.path.dirname(__file__), os.pardir)


def get_data_dir():
    """
    Returns the absolute path to the data directory of the repository as a string.
    """
    return os.path.join(get_root_dir(), 'data')


def callCompiled(f, *arguments, **keywordArguments):
    import dill

    pypyArgs = []
    profile = keywordArguments.pop('profile', None)
    if profile:
        pypyArgs = ['-m', 'vmprof', '-o', profile]

    PIDCallBack = keywordArguments.pop("PIDCallBack", None)

    timeout = keywordArguments.pop('compiledTimeout', None)

    # Use absolute paths.
    compiled_driver_file = os.path.join(get_root_dir(), 'bin', 'compiledDriver.py')
    p = subprocess.Popen(['pypy3'] + pypyArgs + [compiled_driver_file],
                         stdin=subprocess.PIPE, stdout=subprocess.PIPE)


    if PIDCallBack is not None:
        PIDCallBack(p.pid)

    request = {
        "function": f,
        "arguments": arguments,
        "keywordArguments": keywordArguments,
    }
    start = time.time()
    dill.dump(request, p.stdin)

    #p.stdin.write(request)
    p.stdin.flush()
    #p.stdin.close()


    dt = time.time() - start
    if dt > 1:
        eprint("(Python side of compiled driver: SLOW) Wrote serialized message for {} in time {}".format(
                f.__name__,
                dt))

    if timeout is None:
        success, result = dill.load(p.stdout)
    else:
        eprint("Running with timeout", timeout)

        def timeoutCallBack(_1, _2): raise CompiledTimeout()
        signal.signal(signal.SIGALRM, timeoutCallBack)
        signal.alarm(int(math.ceil(timeout)))
        try:
            success, result = dill.load(p.stdout)
            signal.alarm(0)
        except CompiledTimeout:
            # Kill the process
            p.kill()
            raise CompiledTimeout()

    if not success:
        sys.exit(1)

    return result


class timing(object):
    def __init__(self, message):
        self.message = message

    def __enter__(self):
        self.start = time.time()
        return self

    def __exit__(self, type, value, traceback):
        dt = time.time() - self.start
        if isinstance(self.message, str): message = self.message
        elif callable(self.message): message = self.message(dt)
        else: assert False, "Timing message should be string function"
        eprint("%s in %.1f seconds" % (message, dt))

class random_seed(object):
    def __init__(self, seed):
        self.seed = seed

    def __enter__(self):
        self._oldSeed = random.getstate()
        random.seed(self.seed)
        return self

    def __exit__(self, type, value, traceback):
        random.setstate(self._oldSeed)


def randomPermutation(l):
    import random
    l = list(l)
    random.shuffle(l)
    return l


def batches(data, size=1):
    import random
    # Randomly permute the data
    data = list(data)
    random.shuffle(data)

    start = 0
    while start < len(data):
        yield data[start:size + start]
        start += size


def sampleDistribution(d):
    """
    Expects d to be a list of tuples
    The first element should be the probability
    If the tuples are of length 2 then it returns the second element
    Otherwise it returns the suffix tuple
    """
    import random

    z = float(sum(t[0] for t in d))
    if z == 0.:
        eprint("sampleDistribution: z = 0")
        eprint(d)
    r = random.random()
    u = 0.
    for index, t in enumerate(d):
        p = t[0] / z
        # This extra condition is needed for floating-point bullshit
        if r <= u + p or index == len(d) - 1:
            if len(t) <= 2:
                return t[1]
            else:
                return t[1:]
        u += p
        
    assert False


def sampleLogDistribution(d):
    """
    Expects d to be a list of tuples
    The first element should be the log probability
    If the tuples are of length 2 then it returns the second element
    Otherwise it returns the suffix tuple
    """
    import random

    z = lse([t[0] for t in d])
    r = random.random()
    u = 0.
    for t in d:
        p = math.exp(t[0] - z)
        if r < u + p:
            if len(t) <= 2:
                return t[1]
            else:
                return t[1:]
        u += p
    assert False


def testTrainSplit(x, trainingFraction, seed=0):
    if trainingFraction > 1.1:
        # Assume that the training fraction is actually the number of tasks
        # that we want to train on
        trainingFraction = float(trainingFraction) / len(x)
    needToTrain = { j for j, d in enumerate(x)
                    if hasattr(d, 'mustTrain') and d.mustTrain }
    mightTrain = [j for j in range(len(x)) if j not in needToTrain]

    trainingSize = max(0, int(len(x) * trainingFraction - len(needToTrain)))

    import random
    random.seed(seed)
    random.shuffle(mightTrain)
    training = set(mightTrain[:trainingSize]) | needToTrain

    train = [t for j, t in enumerate(x) if j in training]
    test = [t for j, t in enumerate(x) if j not in training]
    return test, train


def numberOfCPUs():
    import multiprocessing
    return multiprocessing.cpu_count()


def loadPickle(f):
    with open(f, 'rb') as handle:
        d = pickle.load(handle)
    return d

def dumpPickle(o,f):
    with open(f, 'wb') as handle:
        pickle.dump(o,handle)


def fst(l):
    for v in l:
        return v


def mean(l):
    n = 0
    t = None
    for x in l:
        if t is None:
            t = x
        else:
            t = t + x
        n += 1

    if n == 0:
        eprint("warning: asked to calculate the mean of an empty list. returning zero.")
        return 0
    return t / float(n)


def variance(l):
    m = mean(l)
    return sum((x - m)**2 for x in l) / len(l)


def standardDeviation(l): return variance(l)**0.5


def median(l):
    if len(l) <= 0:
        return None
    l = sorted(l)
    if len(l) % 2 == 1:
        return l[len(l) // 2]
    return 0.5 * (l[len(l) // 2] + l[len(l) // 2 - 1])

def percentile(l, p):
    l = sorted(l)
    j = int(len(l)*p)
    if j < len(l):
        return l[j]
    return 0

def makeTemporaryFile(directory="/tmp"):
    import tempfile
    fd,p = tempfile.mkstemp(dir=directory)
    os.close(fd)
    return p

class Stopwatch():
    def __init__(self):
        self._elapsed = 0.
        self.running = False
        self._latestStart = None

    def start(self):
        if self.running:
            eprint(
                "(stopwatch: attempted to start an already running stopwatch. Silently ignoring.)")
            return
        self.running = True
        self._latestStart = time.time()

    def stop(self):
        if not self.running:
            eprint(
                "(stopwatch: attempted to stop a stopwatch that is not running. Silently ignoring.)")
            return
        self.running = False
        self._elapsed += time.time() - self._latestStart
        self._latestStart = None

    @property
    def elapsed(self):
        e = self._elapsed
        if self.running:
            e = e + time.time() - self._latestStart
        return e


def userName():
    import getpass
    return getpass.getuser()


def hostname():
    import socket
    return socket.gethostname()


def getPID():
    return os.getpid()


def CPULoad():
    try:
        import psutil
    except BaseException:
        return "unknown - install psutil"
    return psutil.cpu_percent()


def flushEverything():
    sys.stdout.flush()
    sys.stderr.flush()


class RunWithTimeout(Exception):
    pass


def runWithTimeout(k, timeout):
    if timeout is None: return k()
    def timeoutCallBack(_1,_2):
        raise RunWithTimeout()
    signal.signal(signal.SIGPROF, timeoutCallBack)
    signal.setitimer(signal.ITIMER_PROF, timeout)
    
    try:
        result = k()
        signal.signal(signal.SIGPROF, lambda *_:None)
        signal.setitimer(signal.ITIMER_PROF, 0)
        return result
    except RunWithTimeout:
        signal.signal(signal.SIGPROF, lambda *_:None)
        signal.setitimer(signal.ITIMER_PROF, 0)
        raise RunWithTimeout()
    except:
        signal.signal(signal.SIGPROF, lambda *_:None)
        signal.setitimer(signal.ITIMER_PROF, 0)
        raise


def crossProduct(a, b):
    b = list(b)
    for x in a:
        for y in b:
            yield x, y


class PQ(object):
    """why the fuck does Python not wrap this in a class"""

    def __init__(self):
        self.h = []
        self.index2value = {}
        self.nextIndex = 0

    def push(self, priority, v):
        self.index2value[self.nextIndex] = v
        heapq.heappush(self.h, (-priority, self.nextIndex))
        self.nextIndex += 1

    def popMaximum(self):
        i = heapq.heappop(self.h)[1]
        v = self.index2value[i]
        del self.index2value[i]
        return v

    def __iter__(self):
        for _, v in self.h:
            yield self.index2value[v]

    def __len__(self): return len(self.h)

class UnionFind:
    class Class:
        def __init__(self, x):
            self.members = {x}
            self.leader = None
        def chase(self):
            k = self
            while k.leader is not None:
                k = k.leader
            self.leader = k
            return k
            
    def __init__(self):
        # Map from keys to classes
        self.classes = {}
    def unify(self,x,y):
        k1 = self.classes[x].chase()
        k2 = self.classes[y].chase()
        # k2 will be the new leader
        k1.leader = k2
        k2.members |= k1.members
        k1.members = None
        self.classes[x] = k2
        self.classes[y] = k2
        return k2
    def newClass(self,x):
        if x not in self.classes:
            n = Class(x)
            self.classes[x] = n

    def otherMembers(self,x):
        k = self.classes[x].chase()
        self.classes[x] = k
        return k.members        
        

def substringOccurrences(ss, s):
    return sum(s[i:].startswith(ss) for i in range(len(s)))


def normal(s=1., m=0.):
    u = random.random()
    v = random.random()

    n = math.sqrt(-2.0 * log(u)) * math.cos(2.0 * math.pi * v)

    return s * n + m

def powerOfTen(n):
    if n <= 0:
        return False
    while True:
        if n == 1:
            return True
        if n % 10 != 0:
            return False
        n = n / 10

def powerOf(p, n):
    if n <= 0:
        return False
    while True:
        if n == 1:
            return True
        if n % p != 0:
            return False
        n = n / p


def getThisMemoryUsage():
    import os
    import psutil
    process = psutil.Process(os.getpid())
    return process.memory_info().rss
def getMemoryUsageFraction():
    import psutil
    return psutil.virtual_memory().percent
def howManyGigabytesOfMemory():
    import psutil
    return psutil.virtual_memory().total/10**9

def tuplify(x):
    if isinstance(x,(list,tuple)): return tuple(tuplify(z) for z in x)
    return x

# image montage!
def makeNiceArray(l, columns=None):
    n = columns or int(len(l)**0.5)
    a = []
    while l:
        a.append(l[:n])
        l = l[n:]
    return a
def montageMatrix(matrix):
    import numpy as np
    arrays = matrix
    m = max(len(t) for t in arrays)

    size = arrays[0][0].shape
    tp = arrays[0][0].dtype

    arrays = [np.concatenate(ts + [np.zeros(size, dtype=tp)] * (m - len(ts)), axis=1) for ts in arrays]
    arrays = np.concatenate(arrays, axis=0)
    return arrays
def montage(arrays, columns=None):
    return montageMatrix(makeNiceArray(arrays, columns=columns))

def showArrayAsImage(a):
    from pylab import imshow,show
    imshow(a)
    show()


class ParseFailure(Exception):
    pass

def parseSExpression(s):
    s = s.strip()
    def p(n):
        while n <= len(s) and s[n].isspace(): n += 1
        if n == len(s): raise ParseFailure(s)
        if s[n] == '#':
            e,n = p(n + 1)
            return ['#', e],n
        if s[n] == '(':
            l = []
            n += 1
            while True:
                x,n = p(n)
                l.append(x)
                while n <= len(s) and s[n].isspace(): n += 1
                if n == len(s): raise ParseFailure(s)
                if s[n] == ')':
                    n += 1
                    break
            return l,n
        name = []
        while n < len(s) and not s[n].isspace() and s[n] not in '()':
            name.append(s[n])
            n += 1
        name = "".join(name)
        return name,n
    e,n = p(0)
    if n == len(s):
        return e
    raise ParseFailure(s)


def diffuseImagesOutward(imageCoordinates, labelCoordinates, d,
			 maximumRadius = 2.5, minimumRadius = 1.5):
    import numpy as np
    
    n = imageCoordinates.shape[0]
    #d = (np.random.rand(n,2)*2 - 1)*(maximumRadius/2 + minimumRadius/2)

    def _constrainRadii(p):
        r = (p*p).sum()
        if r > maximumRadius:
            return maximumRadius*p/(r**0.5)
        if r < minimumRadius:
            return minimumRadius*p/(r**0.5)
        return p
    def constrainRadii():
        for j in range(n):
            d[j,:] = _constrainRadii(d[j,:])

    for _ in range(10):
        for i in range(n):
            force = np.array([0.,0.])
            for j in range(n):
                if i == j: continue
                p1 = imageCoordinates[i] + d[i]
                p2 = imageCoordinates[j] + d[j]
                l = ((p1 - p2)**2).sum()**0.5
                if l > 1.5: continue
                force += (p1 - p2)/l/max(l,0.2)
            if force.sum() > 0:
                force = force/( (force*force).sum()**0.5)
                d[i] += force
        constrainRadii()
    return d

if __name__ == "__main__":
    def f(n):
        if n == 0: return None
        return [f(n - 1),f(n - 1)]
    z = f(22)
    eprint(getMemoryUsageFraction().percent)
    eprint(getThisMemoryUsage())
