# Supplementary material
Source: ML conference proceedings conference paper supplement (https://proceedings.neurips.cc/paper_files/paper/2022/hash/0113ef4642264adc2e6924a3cbbdf532-Abstract.html)
Supplement: Supplementary file 1 [file 0113ef4642264adc2e6924a3cbbdf532-Supplemental-Conference.zip › neurips_supplementary_cameraready/ec-master/Makefile]

all:
	rm -f data/geom/logoDrawString
	cd solvers && \
	jbuilder build solver.exe && \
	jbuilder build versionDemo.exe && \
	jbuilder build helmholtz.exe && \
	jbuilder build logoDrawString.exe && \
	jbuilder build protonet-tester.exe && \
	jbuilder build compression.exe && \
	jbuilder build gridTest.exe && \
	cp _build/default/compression.exe ../compression && \
	cp _build/default/versionDemo.exe ../versionDemo && \
	cp _build/default/solver.exe ../solver && \
	cp _build/default/helmholtz.exe ../helmholtz && \
	cp _build/default/protonet-tester.exe ../protonet-tester && \
	cp _build/default/logoDrawString.exe \
	../logoDrawString && \
	ln -s ../../logoDrawString \
	../data/geom/logoDrawString
clean:
	cd solvers && jbuilder clean
	rm -f solver
	rm -f compression
	rm -f helmholtz
	rm -f logoDrawString
	rm -f data/geom/logoDrawString
