# Supplementary material
Source: ML conference proceedings conference paper supplement (https://proceedings.neurips.cc/paper_files/paper/2022/hash/0113ef4642264adc2e6924a3cbbdf532-Abstract.html)
Supplement: Supplementary file 1 [file 0113ef4642264adc2e6924a3cbbdf532-Supplemental-Conference.zip › neurips_supplementary_cameraready/ec-master/PBE_Strings_Track/dr-name-long-repeat.sl]

(set-logic SLIA)

 

(synth-fun f ((name String)) String

    ((Start String (ntString))

     (ntString String (name " " "." "Dr." "D" "r"

                       (str.++ ntString ntString)

                       (str.replace ntString ntString ntString)

                       (str.at ntString ntInt)

                       (int.to.str ntInt)

                       (str.substr ntString ntInt ntInt)))

      (ntInt Int (0 1 2

                  (+ ntInt ntInt)

                  (- ntInt ntInt)

                  (str.len ntString)

                  (str.to.int ntString)

                  (str.indexof ntString ntString ntInt)))

      (ntBool Bool (true false

                    (str.prefixof ntString ntString)

                    (str.suffixof ntString ntString)

                    (str.contains ntString ntString)))))


(declare-var name String)


(constraint (= (f "Launa Withers") "Dr. Launa"))

(constraint (= (f "Launa Withers") "Dr. Launa"))

(constraint (= (f "Launa Withers") "Dr. Launa"))

(constraint (= (f "Lakenya Edison") "Dr. Lakenya"))

(constraint (= (f "Lakenya Edison") "Dr. Lakenya"))

(constraint (= (f "Lakenya Edison") "Dr. Lakenya"))

(constraint (= (f "Brendan Hage") "Dr. Brendan"))

(constraint (= (f "Brendan Hage") "Dr. Brendan"))

(constraint (= (f "Brendan Hage") "Dr. Brendan"))

(constraint (= (f "Bradford Lango") "Dr. Bradford"))

(constraint (= (f "Bradford Lango") "Dr. Bradford"))

(constraint (= (f "Bradford Lango") "Dr. Bradford"))

(constraint (= (f "Rudolf Akiyama") "Dr. Rudolf"))

(constraint (= (f "Rudolf Akiyama") "Dr. Rudolf"))

(constraint (= (f "Rudolf Akiyama") "Dr. Rudolf"))

(constraint (= (f "Lara Constable") "Dr. Lara"))

(constraint (= (f "Lara Constable") "Dr. Lara"))

(constraint (= (f "Lara Constable") "Dr. Lara"))

(constraint (= (f "Madelaine Ghoston") "Dr. Madelaine"))

(constraint (= (f "Madelaine Ghoston") "Dr. Madelaine"))

(constraint (= (f "Madelaine Ghoston") "Dr. Madelaine"))

(constraint (= (f "Salley Hornak") "Dr. Salley"))

(constraint (= (f "Salley Hornak") "Dr. Salley"))

(constraint (= (f "Salley Hornak") "Dr. Salley"))

(constraint (= (f "Micha Junkin") "Dr. Micha"))

(constraint (= (f "Micha Junkin") "Dr. Micha"))

(constraint (= (f "Micha Junkin") "Dr. Micha"))

(constraint (= (f "Teddy Bobo") "Dr. Teddy"))

(constraint (= (f "Teddy Bobo") "Dr. Teddy"))

(constraint (= (f "Teddy Bobo") "Dr. Teddy"))

(constraint (= (f "Coralee Scalia") "Dr. Coralee"))

(constraint (= (f "Coralee Scalia") "Dr. Coralee"))

(constraint (= (f "Coralee Scalia") "Dr. Coralee"))

(constraint (= (f "Jeff Quashie") "Dr. Jeff"))

(constraint (= (f "Jeff Quashie") "Dr. Jeff"))

(constraint (= (f "Jeff Quashie") "Dr. Jeff"))

(constraint (= (f "Vena Babiarz") "Dr. Vena"))

(constraint (= (f "Vena Babiarz") "Dr. Vena"))

(constraint (= (f "Vena Babiarz") "Dr. Vena"))

(constraint (= (f "Karrie Lain") "Dr. Karrie"))

(constraint (= (f "Karrie Lain") "Dr. Karrie"))

(constraint (= (f "Karrie Lain") "Dr. Karrie"))

(constraint (= (f "Tobias Dermody") "Dr. Tobias"))

(constraint (= (f "Tobias Dermody") "Dr. Tobias"))

(constraint (= (f "Tobias Dermody") "Dr. Tobias"))

(constraint (= (f "Celsa Hopkins") "Dr. Celsa"))

(constraint (= (f "Celsa Hopkins") "Dr. Celsa"))

(constraint (= (f "Celsa Hopkins") "Dr. Celsa"))

(constraint (= (f "Kimberley Halpern") "Dr. Kimberley"))

(constraint (= (f "Kimberley Halpern") "Dr. Kimberley"))

(constraint (= (f "Kimberley Halpern") "Dr. Kimberley"))

(constraint (= (f "Phillip Rowden") "Dr. Phillip"))

(constraint (= (f "Phillip Rowden") "Dr. Phillip"))

(constraint (= (f "Phillip Rowden") "Dr. Phillip"))

(constraint (= (f "Elias Neil") "Dr. Elias"))

(constraint (= (f "Elias Neil") "Dr. Elias"))

(constraint (= (f "Elias Neil") "Dr. Elias"))

(constraint (= (f "Lashanda Cortes") "Dr. Lashanda"))

(constraint (= (f "Lashanda Cortes") "Dr. Lashanda"))

(constraint (= (f "Lashanda Cortes") "Dr. Lashanda"))

(constraint (= (f "Mackenzie Spell") "Dr. Mackenzie"))

(constraint (= (f "Mackenzie Spell") "Dr. Mackenzie"))

(constraint (= (f "Mackenzie Spell") "Dr. Mackenzie"))

(constraint (= (f "Kathlyn Eccleston") "Dr. Kathlyn"))

(constraint (= (f "Kathlyn Eccleston") "Dr. Kathlyn"))

(constraint (= (f "Kathlyn Eccleston") "Dr. Kathlyn"))

(constraint (= (f "Georgina Brescia") "Dr. Georgina"))

(constraint (= (f "Georgina Brescia") "Dr. Georgina"))

(constraint (= (f "Georgina Brescia") "Dr. Georgina"))

(constraint (= (f "Beata Miah") "Dr. Beata"))

(constraint (= (f "Beata Miah") "Dr. Beata"))

(constraint (= (f "Beata Miah") "Dr. Beata"))

(constraint (= (f "Desiree Seamons") "Dr. Desiree"))

(constraint (= (f "Desiree Seamons") "Dr. Desiree"))

(constraint (= (f "Desiree Seamons") "Dr. Desiree"))

(constraint (= (f "Jeanice Soderstrom") "Dr. Jeanice"))

(constraint (= (f "Jeanice Soderstrom") "Dr. Jeanice"))

(constraint (= (f "Jeanice Soderstrom") "Dr. Jeanice"))

(constraint (= (f "Mariel Jurgens") "Dr. Mariel"))

(constraint (= (f "Mariel Jurgens") "Dr. Mariel"))

(constraint (= (f "Mariel Jurgens") "Dr. Mariel"))

(constraint (= (f "Alida Bogle") "Dr. Alida"))

(constraint (= (f "Alida Bogle") "Dr. Alida"))

(constraint (= (f "Alida Bogle") "Dr. Alida"))

(constraint (= (f "Jacqualine Olague") "Dr. Jacqualine"))

(constraint (= (f "Jacqualine Olague") "Dr. Jacqualine"))

(constraint (= (f "Jacqualine Olague") "Dr. Jacqualine"))

(constraint (= (f "Joaquin Clasen") "Dr. Joaquin"))

(constraint (= (f "Joaquin Clasen") "Dr. Joaquin"))

(constraint (= (f "Joaquin Clasen") "Dr. Joaquin"))

(constraint (= (f "Samuel Richert") "Dr. Samuel"))

(constraint (= (f "Samuel Richert") "Dr. Samuel"))

(constraint (= (f "Samuel Richert") "Dr. Samuel"))

(constraint (= (f "Malissa Marcus") "Dr. Malissa"))

(constraint (= (f "Malissa Marcus") "Dr. Malissa"))

(constraint (= (f "Malissa Marcus") "Dr. Malissa"))

(constraint (= (f "Alaina Partida") "Dr. Alaina"))

(constraint (= (f "Alaina Partida") "Dr. Alaina"))

(constraint (= (f "Alaina Partida") "Dr. Alaina"))

(constraint (= (f "Trinidad Mulloy") "Dr. Trinidad"))

(constraint (= (f "Trinidad Mulloy") "Dr. Trinidad"))

(constraint (= (f "Trinidad Mulloy") "Dr. Trinidad"))

(constraint (= (f "Carlene Garrard") "Dr. Carlene"))

(constraint (= (f "Carlene Garrard") "Dr. Carlene"))

(constraint (= (f "Carlene Garrard") "Dr. Carlene"))

(constraint (= (f "Melodi Chism") "Dr. Melodi"))

(constraint (= (f "Melodi Chism") "Dr. Melodi"))

(constraint (= (f "Melodi Chism") "Dr. Melodi"))

(constraint (= (f "Bess Chilcott") "Dr. Bess"))

(constraint (= (f "Bess Chilcott") "Dr. Bess"))

(constraint (= (f "Bess Chilcott") "Dr. Bess"))

(constraint (= (f "Chong Aylward") "Dr. Chong"))

(constraint (= (f "Chong Aylward") "Dr. Chong"))

(constraint (= (f "Chong Aylward") "Dr. Chong"))

(constraint (= (f "Jani Ramthun") "Dr. Jani"))

(constraint (= (f "Jani Ramthun") "Dr. Jani"))

(constraint (= (f "Jani Ramthun") "Dr. Jani"))

(constraint (= (f "Jacquiline Heintz") "Dr. Jacquiline"))

(constraint (= (f "Jacquiline Heintz") "Dr. Jacquiline"))

(constraint (= (f "Jacquiline Heintz") "Dr. Jacquiline"))

(constraint (= (f "Hayley Marquess") "Dr. Hayley"))

(constraint (= (f "Hayley Marquess") "Dr. Hayley"))

(constraint (= (f "Hayley Marquess") "Dr. Hayley"))

(constraint (= (f "Andria Spagnoli") "Dr. Andria"))

(constraint (= (f "Andria Spagnoli") "Dr. Andria"))

(constraint (= (f "Andria Spagnoli") "Dr. Andria"))

(constraint (= (f "Irwin Covelli") "Dr. Irwin"))

(constraint (= (f "Irwin Covelli") "Dr. Irwin"))

(constraint (= (f "Irwin Covelli") "Dr. Irwin"))

(constraint (= (f "Gertude Montiel") "Dr. Gertude"))

(constraint (= (f "Gertude Montiel") "Dr. Gertude"))

(constraint (= (f "Gertude Montiel") "Dr. Gertude"))

(constraint (= (f "Stefany Reily") "Dr. Stefany"))

(constraint (= (f "Stefany Reily") "Dr. Stefany"))

(constraint (= (f "Stefany Reily") "Dr. Stefany"))

(constraint (= (f "Rae Mcgaughey") "Dr. Rae"))

(constraint (= (f "Rae Mcgaughey") "Dr. Rae"))

(constraint (= (f "Rae Mcgaughey") "Dr. Rae"))

(constraint (= (f "Cruz Latimore") "Dr. Cruz"))

(constraint (= (f "Cruz Latimore") "Dr. Cruz"))

(constraint (= (f "Cruz Latimore") "Dr. Cruz"))

(constraint (= (f "Maryann Casler") "Dr. Maryann"))

(constraint (= (f "Maryann Casler") "Dr. Maryann"))

(constraint (= (f "Maryann Casler") "Dr. Maryann"))

(constraint (= (f "Annalisa Gregori") "Dr. Annalisa"))

(constraint (= (f "Annalisa Gregori") "Dr. Annalisa"))

(constraint (= (f "Annalisa Gregori") "Dr. Annalisa"))

(constraint (= (f "Jenee Pannell") "Dr. Jenee"))

(constraint (= (f "Jenee Pannell") "Dr. Jenee"))

(constraint (= (f "Jenee Pannell") "Dr. Jenee"))


(check-synth)
