# Supplementary material
Source: ML conference proceedings conference paper supplement (https://proceedings.neurips.cc/paper_files/paper/2022/hash/0113ef4642264adc2e6924a3cbbdf532-Abstract.html)
Supplement: Supplementary file 1 [file 0113ef4642264adc2e6924a3cbbdf532-Supplemental-Conference.zip › neurips_supplementary_cameraready/ec-master/PBE_Strings_Track/firstname-long.sl]

(set-logic SLIA)

 

(synth-fun f ((name String)) String

    ((Start String (ntString))

     (ntString String (name " "

                       (str.++ ntString ntString)

                       (str.replace ntString ntString ntString)

                       (str.at ntString ntInt)

                       (int.to.str ntInt)

                       (str.substr ntString ntInt ntInt)))

      (ntInt Int (0 1 2

                  (+ ntInt ntInt)

                  (- ntInt ntInt)

                  (str.len ntString)

                  (str.to.int ntString)

                  (str.indexof ntString ntString ntInt)))

      (ntBool Bool (true false

                    (str.prefixof ntString ntString)

                    (str.suffixof ntString ntString)

                    (str.contains ntString ntString)))))


(declare-var name String)

 

(constraint (= (f "Nancy FreeHafer") "Nancy"))

(constraint (= (f "Andrew Cencici") "Andrew"))

(constraint (= (f "Jan Kotas") "Jan"))

(constraint (= (f "Mariya Sergienko") "Mariya"))

(constraint (= (f "Launa Withers") "Launa"))

(constraint (= (f "Lakenya Edison") "Lakenya"))

(constraint (= (f "Brendan Hage") "Brendan"))

(constraint (= (f "Bradford Lango") "Bradford"))

(constraint (= (f "Rudolf Akiyama") "Rudolf"))

(constraint (= (f "Lara Constable") "Lara"))

(constraint (= (f "Madelaine Ghoston") "Madelaine"))

(constraint (= (f "Salley Hornak") "Salley"))

(constraint (= (f "Micha Junkin") "Micha"))

(constraint (= (f "Teddy Bobo") "Teddy"))

(constraint (= (f "Coralee Scalia") "Coralee"))

(constraint (= (f "Jeff Quashie") "Jeff"))

(constraint (= (f "Vena Babiarz") "Vena"))

(constraint (= (f "Karrie Lain") "Karrie"))

(constraint (= (f "Tobias Dermody") "Tobias"))

(constraint (= (f "Celsa Hopkins") "Celsa"))

(constraint (= (f "Kimberley Halpern") "Kimberley"))

(constraint (= (f "Phillip Rowden") "Phillip"))

(constraint (= (f "Elias Neil") "Elias"))

(constraint (= (f "Lashanda Cortes") "Lashanda"))

(constraint (= (f "Mackenzie Spell") "Mackenzie"))

(constraint (= (f "Kathlyn Eccleston") "Kathlyn"))

(constraint (= (f "Georgina Brescia") "Georgina"))

(constraint (= (f "Beata Miah") "Beata"))

(constraint (= (f "Desiree Seamons") "Desiree"))

(constraint (= (f "Jeanice Soderstrom") "Jeanice"))

(constraint (= (f "Mariel Jurgens") "Mariel"))

(constraint (= (f "Alida Bogle") "Alida"))

(constraint (= (f "Jacqualine Olague") "Jacqualine"))

(constraint (= (f "Joaquin Clasen") "Joaquin"))

(constraint (= (f "Samuel Richert") "Samuel"))

(constraint (= (f "Malissa Marcus") "Malissa"))

(constraint (= (f "Alaina Partida") "Alaina"))

(constraint (= (f "Trinidad Mulloy") "Trinidad"))

(constraint (= (f "Carlene Garrard") "Carlene"))

(constraint (= (f "Melodi Chism") "Melodi"))

(constraint (= (f "Bess Chilcott") "Bess"))

(constraint (= (f "Chong Aylward") "Chong"))

(constraint (= (f "Jani Ramthun") "Jani"))

(constraint (= (f "Jacquiline Heintz") "Jacquiline"))

(constraint (= (f "Hayley Marquess") "Hayley"))

(constraint (= (f "Andria Spagnoli") "Andria"))

(constraint (= (f "Irwin Covelli") "Irwin"))

(constraint (= (f "Gertude Montiel") "Gertude"))

(constraint (= (f "Stefany Reily") "Stefany"))

(constraint (= (f "Rae Mcgaughey") "Rae"))

(constraint (= (f "Cruz Latimore") "Cruz"))

(constraint (= (f "Maryann Casler") "Maryann"))

(constraint (= (f "Annalisa Gregori") "Annalisa"))

(constraint (= (f "Jenee Pannell") "Jenee"))

 

(check-synth)
