# Supplementary material
Source: ML conference proceedings conference paper supplement (https://proceedings.neurips.cc/paper_files/paper/2022/hash/0113ef4642264adc2e6924a3cbbdf532-Abstract.html)
Supplement: Supplementary file 1 [file 0113ef4642264adc2e6924a3cbbdf532-Supplemental-Conference.zip › neurips_supplementary_cameraready/ec-master/PBE_Strings_Track/initials-long-repeat.sl]

(set-logic SLIA)

 

(synth-fun f ((name String)) String

    ((Start String (ntString))

     (ntString String (name " " "."

                       (str.++ ntString ntString)

                       (str.replace ntString ntString ntString)

                       (str.at ntString ntInt)

                       (int.to.str ntInt)

                       (str.substr ntString ntInt ntInt)))

      (ntInt Int (0 1 2

                  (+ ntInt ntInt)

                  (- ntInt ntInt)

                  (str.len ntString)

                  (str.to.int ntString)

                  (str.indexof ntString ntString ntInt)))

      (ntBool Bool (true false

                    (str.prefixof ntString ntString)

                    (str.suffixof ntString ntString)

                    (str.contains ntString ntString)))))


(declare-var name String)

 

(constraint (= (f "Nancy FreeHafer") "N.F."))

(constraint (= (f "Andrew Cencici") "A.C."))

(constraint (= (f "Jan Kotas") "J.K."))

(constraint (= (f "Mariya Sergienko") "M.S."))

(constraint (= (f "Launa Withers") "L.W."))

(constraint (= (f "Launa Withers") "L.W."))

(constraint (= (f "Launa Withers") "L.W."))

(constraint (= (f "Lakenya Edison") "L.E."))

(constraint (= (f "Lakenya Edison") "L.E."))

(constraint (= (f "Lakenya Edison") "L.E."))

(constraint (= (f "Brendan Hage") "B.H."))

(constraint (= (f "Brendan Hage") "B.H."))

(constraint (= (f "Brendan Hage") "B.H."))

(constraint (= (f "Bradford Lango") "B.L."))

(constraint (= (f "Bradford Lango") "B.L."))

(constraint (= (f "Bradford Lango") "B.L."))

(constraint (= (f "Rudolf Akiyama") "R.A."))

(constraint (= (f "Rudolf Akiyama") "R.A."))

(constraint (= (f "Rudolf Akiyama") "R.A."))

(constraint (= (f "Lara Constable") "L.C."))

(constraint (= (f "Lara Constable") "L.C."))

(constraint (= (f "Lara Constable") "L.C."))

(constraint (= (f "Madelaine Ghoston") "M.G."))

(constraint (= (f "Madelaine Ghoston") "M.G."))

(constraint (= (f "Madelaine Ghoston") "M.G."))

(constraint (= (f "Salley Hornak") "S.H."))

(constraint (= (f "Salley Hornak") "S.H."))

(constraint (= (f "Salley Hornak") "S.H."))

(constraint (= (f "Micha Junkin") "M.J."))

(constraint (= (f "Micha Junkin") "M.J."))

(constraint (= (f "Micha Junkin") "M.J."))

(constraint (= (f "Teddy Bobo") "T.B."))

(constraint (= (f "Teddy Bobo") "T.B."))

(constraint (= (f "Teddy Bobo") "T.B."))

(constraint (= (f "Coralee Scalia") "C.S."))

(constraint (= (f "Coralee Scalia") "C.S."))

(constraint (= (f "Coralee Scalia") "C.S."))

(constraint (= (f "Jeff Quashie") "J.Q."))

(constraint (= (f "Jeff Quashie") "J.Q."))

(constraint (= (f "Jeff Quashie") "J.Q."))

(constraint (= (f "Vena Babiarz") "V.B."))

(constraint (= (f "Vena Babiarz") "V.B."))

(constraint (= (f "Vena Babiarz") "V.B."))

(constraint (= (f "Karrie Lain") "K.L."))

(constraint (= (f "Karrie Lain") "K.L."))

(constraint (= (f "Karrie Lain") "K.L."))

(constraint (= (f "Tobias Dermody") "T.D."))

(constraint (= (f "Tobias Dermody") "T.D."))

(constraint (= (f "Tobias Dermody") "T.D."))

(constraint (= (f "Celsa Hopkins") "C.H."))

(constraint (= (f "Celsa Hopkins") "C.H."))

(constraint (= (f "Celsa Hopkins") "C.H."))

(constraint (= (f "Kimberley Halpern") "K.H."))

(constraint (= (f "Kimberley Halpern") "K.H."))

(constraint (= (f "Kimberley Halpern") "K.H."))

(constraint (= (f "Phillip Rowden") "P.R."))

(constraint (= (f "Phillip Rowden") "P.R."))

(constraint (= (f "Phillip Rowden") "P.R."))

(constraint (= (f "Elias Neil") "E.N."))

(constraint (= (f "Elias Neil") "E.N."))

(constraint (= (f "Elias Neil") "E.N."))

(constraint (= (f "Lashanda Cortes") "L.C."))

(constraint (= (f "Lashanda Cortes") "L.C."))

(constraint (= (f "Lashanda Cortes") "L.C."))

(constraint (= (f "Mackenzie Spell") "M.S."))

(constraint (= (f "Mackenzie Spell") "M.S."))

(constraint (= (f "Mackenzie Spell") "M.S."))

(constraint (= (f "Kathlyn Eccleston") "K.E."))

(constraint (= (f "Kathlyn Eccleston") "K.E."))

(constraint (= (f "Kathlyn Eccleston") "K.E."))

(constraint (= (f "Georgina Brescia") "G.B."))

(constraint (= (f "Georgina Brescia") "G.B."))

(constraint (= (f "Georgina Brescia") "G.B."))

(constraint (= (f "Beata Miah") "B.M."))

(constraint (= (f "Beata Miah") "B.M."))

(constraint (= (f "Beata Miah") "B.M."))

(constraint (= (f "Desiree Seamons") "D.S."))

(constraint (= (f "Desiree Seamons") "D.S."))

(constraint (= (f "Desiree Seamons") "D.S."))

(constraint (= (f "Jeanice Soderstrom") "J.S."))

(constraint (= (f "Jeanice Soderstrom") "J.S."))

(constraint (= (f "Jeanice Soderstrom") "J.S."))

(constraint (= (f "Mariel Jurgens") "M.J."))

(constraint (= (f "Mariel Jurgens") "M.J."))

(constraint (= (f "Mariel Jurgens") "M.J."))

(constraint (= (f "Alida Bogle") "A.B."))

(constraint (= (f "Alida Bogle") "A.B."))

(constraint (= (f "Alida Bogle") "A.B."))

(constraint (= (f "Jacqualine Olague") "J.O."))

(constraint (= (f "Jacqualine Olague") "J.O."))

(constraint (= (f "Jacqualine Olague") "J.O."))

(constraint (= (f "Joaquin Clasen") "J.C."))

(constraint (= (f "Joaquin Clasen") "J.C."))

(constraint (= (f "Joaquin Clasen") "J.C."))

(constraint (= (f "Samuel Richert") "S.R."))

(constraint (= (f "Samuel Richert") "S.R."))

(constraint (= (f "Samuel Richert") "S.R."))

(constraint (= (f "Malissa Marcus") "M.M."))

(constraint (= (f "Malissa Marcus") "M.M."))

(constraint (= (f "Malissa Marcus") "M.M."))

(constraint (= (f "Alaina Partida") "A.P."))

(constraint (= (f "Alaina Partida") "A.P."))

(constraint (= (f "Alaina Partida") "A.P."))

(constraint (= (f "Trinidad Mulloy") "T.M."))

(constraint (= (f "Trinidad Mulloy") "T.M."))

(constraint (= (f "Trinidad Mulloy") "T.M."))

(constraint (= (f "Carlene Garrard") "C.G."))

(constraint (= (f "Carlene Garrard") "C.G."))

(constraint (= (f "Carlene Garrard") "C.G."))

(constraint (= (f "Melodi Chism") "M.C."))

(constraint (= (f "Melodi Chism") "M.C."))

(constraint (= (f "Melodi Chism") "M.C."))

(constraint (= (f "Bess Chilcott") "B.C."))

(constraint (= (f "Bess Chilcott") "B.C."))

(constraint (= (f "Bess Chilcott") "B.C."))

(constraint (= (f "Chong Aylward") "C.A."))

(constraint (= (f "Chong Aylward") "C.A."))

(constraint (= (f "Chong Aylward") "C.A."))

(constraint (= (f "Jani Ramthun") "J.R."))

(constraint (= (f "Jani Ramthun") "J.R."))

(constraint (= (f "Jani Ramthun") "J.R."))

(constraint (= (f "Jacquiline Heintz") "J.H."))

(constraint (= (f "Jacquiline Heintz") "J.H."))

(constraint (= (f "Jacquiline Heintz") "J.H."))

(constraint (= (f "Hayley Marquess") "H.M."))

(constraint (= (f "Hayley Marquess") "H.M."))

(constraint (= (f "Hayley Marquess") "H.M."))

(constraint (= (f "Andria Spagnoli") "A.S."))

(constraint (= (f "Andria Spagnoli") "A.S."))

(constraint (= (f "Andria Spagnoli") "A.S."))

(constraint (= (f "Irwin Covelli") "I.C."))

(constraint (= (f "Irwin Covelli") "I.C."))

(constraint (= (f "Irwin Covelli") "I.C."))

(constraint (= (f "Gertude Montiel") "G.M."))

(constraint (= (f "Gertude Montiel") "G.M."))

(constraint (= (f "Gertude Montiel") "G.M."))

(constraint (= (f "Stefany Reily") "S.R."))

(constraint (= (f "Stefany Reily") "S.R."))

(constraint (= (f "Stefany Reily") "S.R."))

(constraint (= (f "Rae Mcgaughey") "R.M."))

(constraint (= (f "Rae Mcgaughey") "R.M."))

(constraint (= (f "Rae Mcgaughey") "R.M."))

(constraint (= (f "Cruz Latimore") "C.L."))

(constraint (= (f "Cruz Latimore") "C.L."))

(constraint (= (f "Cruz Latimore") "C.L."))

(constraint (= (f "Maryann Casler") "M.C."))

(constraint (= (f "Maryann Casler") "M.C."))

(constraint (= (f "Maryann Casler") "M.C."))

(constraint (= (f "Annalisa Gregori") "A.G."))

(constraint (= (f "Annalisa Gregori") "A.G."))

(constraint (= (f "Annalisa Gregori") "A.G."))

(constraint (= (f "Jenee Pannell") "J.P."))

(constraint (= (f "Jenee Pannell") "J.P."))

(constraint (= (f "Jenee Pannell") "J.P."))

(constraint (= (f "Launa Withers") "L.W."))

(constraint (= (f "Lakenya Edison") "L.E."))

(constraint (= (f "Brendan Hage") "B.H."))

(constraint (= (f "Bradford Lango") "B.L."))

(constraint (= (f "Rudolf Akiyama") "R.A."))

(constraint (= (f "Lara Constable") "L.C."))

(constraint (= (f "Madelaine Ghoston") "M.G."))

(constraint (= (f "Salley Hornak") "S.H."))

(constraint (= (f "Micha Junkin") "M.J."))

(constraint (= (f "Teddy Bobo") "T.B."))

(constraint (= (f "Coralee Scalia") "C.S."))

(constraint (= (f "Jeff Quashie") "J.Q."))

(constraint (= (f "Vena Babiarz") "V.B."))

(constraint (= (f "Karrie Lain") "K.L."))

(constraint (= (f "Tobias Dermody") "T.D."))

(constraint (= (f "Celsa Hopkins") "C.H."))

(constraint (= (f "Kimberley Halpern") "K.H."))

(constraint (= (f "Phillip Rowden") "P.R."))

(constraint (= (f "Elias Neil") "E.N."))

(constraint (= (f "Lashanda Cortes") "L.C."))

(constraint (= (f "Mackenzie Spell") "M.S."))

(constraint (= (f "Kathlyn Eccleston") "K.E."))

(constraint (= (f "Georgina Brescia") "G.B."))

(constraint (= (f "Beata Miah") "B.M."))

(constraint (= (f "Desiree Seamons") "D.S."))

(constraint (= (f "Jeanice Soderstrom") "J.S."))

(constraint (= (f "Mariel Jurgens") "M.J."))

(constraint (= (f "Alida Bogle") "A.B."))

(constraint (= (f "Jacqualine Olague") "J.O."))

(constraint (= (f "Joaquin Clasen") "J.C."))

(constraint (= (f "Samuel Richert") "S.R."))

(constraint (= (f "Malissa Marcus") "M.M."))

(constraint (= (f "Alaina Partida") "A.P."))

(constraint (= (f "Trinidad Mulloy") "T.M."))

(constraint (= (f "Carlene Garrard") "C.G."))

(constraint (= (f "Melodi Chism") "M.C."))

(constraint (= (f "Bess Chilcott") "B.C."))

(constraint (= (f "Chong Aylward") "C.A."))

(constraint (= (f "Jani Ramthun") "J.R."))

(constraint (= (f "Jacquiline Heintz") "J.H."))

(constraint (= (f "Hayley Marquess") "H.M."))

(constraint (= (f "Andria Spagnoli") "A.S."))

(constraint (= (f "Irwin Covelli") "I.C."))

(constraint (= (f "Gertude Montiel") "G.M."))

(constraint (= (f "Stefany Reily") "S.R."))

(constraint (= (f "Rae Mcgaughey") "R.M."))

(constraint (= (f "Cruz Latimore") "C.L."))

(constraint (= (f "Maryann Casler") "M.C."))

(constraint (= (f "Annalisa Gregori") "A.G."))

(constraint (= (f "Jenee Pannell") "J.P."))


(check-synth)
