# Supplementary material
Source: ML conference proceedings conference paper supplement (https://proceedings.neurips.cc/paper_files/paper/2022/hash/0113ef4642264adc2e6924a3cbbdf532-Abstract.html)
Supplement: Supplementary file 1 [file 0113ef4642264adc2e6924a3cbbdf532-Supplemental-Conference.zip › neurips_supplementary_cameraready/ec-master/PBE_Strings_Track/lastname-long-repeat.sl]

(set-logic SLIA)

 

(synth-fun f ((name String)) String

    ((Start String (ntString))

     (ntString String (name " " 

                       (str.++ ntString ntString)

                       (str.replace ntString ntString ntString)

                       (str.at ntString ntInt)

                       (int.to.str ntInt)

                       (str.substr ntString ntInt ntInt)))

      (ntInt Int (0 1

                  (+ ntInt ntInt)

                  (- ntInt ntInt)

                  (str.len ntString)

                  (str.to.int ntString)

                  (str.indexof ntString ntString ntInt)))

      (ntBool Bool (true false

                    (str.prefixof ntString ntString)

                    (str.suffixof ntString ntString)

                    (str.contains ntString ntString)))))


(declare-var name String)

 

(constraint (= (f "Nancy FreeHafer") "FreeHafer"))

(constraint (= (f "Andrew Cencici") "Cencici"))

(constraint (= (f "Jan Kotas") "Kotas"))

(constraint (= (f "Mariya Sergienko") "Sergienko"))

(constraint (= (f "Launa Withers") "Withers"))

(constraint (= (f "Launa Withers") "Withers"))

(constraint (= (f "Launa Withers") "Withers"))

(constraint (= (f "Lakenya Edison") "Edison"))

(constraint (= (f "Lakenya Edison") "Edison"))

(constraint (= (f "Lakenya Edison") "Edison"))

(constraint (= (f "Brendan Hage") "Hage"))

(constraint (= (f "Brendan Hage") "Hage"))

(constraint (= (f "Brendan Hage") "Hage"))

(constraint (= (f "Bradford Lango") "Lango"))

(constraint (= (f "Bradford Lango") "Lango"))

(constraint (= (f "Bradford Lango") "Lango"))

(constraint (= (f "Rudolf Akiyama") "Akiyama"))

(constraint (= (f "Rudolf Akiyama") "Akiyama"))

(constraint (= (f "Rudolf Akiyama") "Akiyama"))

(constraint (= (f "Lara Constable") "Constable"))

(constraint (= (f "Lara Constable") "Constable"))

(constraint (= (f "Lara Constable") "Constable"))

(constraint (= (f "Madelaine Ghoston") "Ghoston"))

(constraint (= (f "Madelaine Ghoston") "Ghoston"))

(constraint (= (f "Madelaine Ghoston") "Ghoston"))

(constraint (= (f "Salley Hornak") "Hornak"))

(constraint (= (f "Salley Hornak") "Hornak"))

(constraint (= (f "Salley Hornak") "Hornak"))

(constraint (= (f "Micha Junkin") "Junkin"))

(constraint (= (f "Micha Junkin") "Junkin"))

(constraint (= (f "Micha Junkin") "Junkin"))

(constraint (= (f "Teddy Bobo") "Bobo"))

(constraint (= (f "Teddy Bobo") "Bobo"))

(constraint (= (f "Teddy Bobo") "Bobo"))

(constraint (= (f "Coralee Scalia") "Scalia"))

(constraint (= (f "Coralee Scalia") "Scalia"))

(constraint (= (f "Coralee Scalia") "Scalia"))

(constraint (= (f "Jeff Quashie") "Quashie"))

(constraint (= (f "Jeff Quashie") "Quashie"))

(constraint (= (f "Jeff Quashie") "Quashie"))

(constraint (= (f "Vena Babiarz") "Babiarz"))

(constraint (= (f "Vena Babiarz") "Babiarz"))

(constraint (= (f "Vena Babiarz") "Babiarz"))

(constraint (= (f "Karrie Lain") "Lain"))

(constraint (= (f "Karrie Lain") "Lain"))

(constraint (= (f "Karrie Lain") "Lain"))

(constraint (= (f "Tobias Dermody") "Dermody"))

(constraint (= (f "Tobias Dermody") "Dermody"))

(constraint (= (f "Tobias Dermody") "Dermody"))

(constraint (= (f "Celsa Hopkins") "Hopkins"))

(constraint (= (f "Celsa Hopkins") "Hopkins"))

(constraint (= (f "Celsa Hopkins") "Hopkins"))

(constraint (= (f "Kimberley Halpern") "Halpern"))

(constraint (= (f "Kimberley Halpern") "Halpern"))

(constraint (= (f "Kimberley Halpern") "Halpern"))

(constraint (= (f "Phillip Rowden") "Rowden"))

(constraint (= (f "Phillip Rowden") "Rowden"))

(constraint (= (f "Phillip Rowden") "Rowden"))

(constraint (= (f "Elias Neil") "Neil"))

(constraint (= (f "Elias Neil") "Neil"))

(constraint (= (f "Elias Neil") "Neil"))

(constraint (= (f "Lashanda Cortes") "Cortes"))

(constraint (= (f "Lashanda Cortes") "Cortes"))

(constraint (= (f "Lashanda Cortes") "Cortes"))

(constraint (= (f "Mackenzie Spell") "Spell"))

(constraint (= (f "Mackenzie Spell") "Spell"))

(constraint (= (f "Mackenzie Spell") "Spell"))

(constraint (= (f "Kathlyn Eccleston") "Eccleston"))

(constraint (= (f "Kathlyn Eccleston") "Eccleston"))

(constraint (= (f "Kathlyn Eccleston") "Eccleston"))

(constraint (= (f "Georgina Brescia") "Brescia"))

(constraint (= (f "Georgina Brescia") "Brescia"))

(constraint (= (f "Georgina Brescia") "Brescia"))

(constraint (= (f "Beata Miah") "Miah"))

(constraint (= (f "Beata Miah") "Miah"))

(constraint (= (f "Beata Miah") "Miah"))

(constraint (= (f "Desiree Seamons") "Seamons"))

(constraint (= (f "Desiree Seamons") "Seamons"))

(constraint (= (f "Desiree Seamons") "Seamons"))

(constraint (= (f "Jeanice Soderstrom") "Soderstrom"))

(constraint (= (f "Jeanice Soderstrom") "Soderstrom"))

(constraint (= (f "Jeanice Soderstrom") "Soderstrom"))

(constraint (= (f "Mariel Jurgens") "Jurgens"))

(constraint (= (f "Mariel Jurgens") "Jurgens"))

(constraint (= (f "Mariel Jurgens") "Jurgens"))

(constraint (= (f "Alida Bogle") "Bogle"))

(constraint (= (f "Alida Bogle") "Bogle"))

(constraint (= (f "Alida Bogle") "Bogle"))

(constraint (= (f "Jacqualine Olague") "Olague"))

(constraint (= (f "Jacqualine Olague") "Olague"))

(constraint (= (f "Jacqualine Olague") "Olague"))

(constraint (= (f "Joaquin Clasen") "Clasen"))

(constraint (= (f "Joaquin Clasen") "Clasen"))

(constraint (= (f "Joaquin Clasen") "Clasen"))

(constraint (= (f "Samuel Richert") "Richert"))

(constraint (= (f "Samuel Richert") "Richert"))

(constraint (= (f "Samuel Richert") "Richert"))

(constraint (= (f "Malissa Marcus") "Marcus"))

(constraint (= (f "Malissa Marcus") "Marcus"))

(constraint (= (f "Malissa Marcus") "Marcus"))

(constraint (= (f "Alaina Partida") "Partida"))

(constraint (= (f "Alaina Partida") "Partida"))

(constraint (= (f "Alaina Partida") "Partida"))

(constraint (= (f "Trinidad Mulloy") "Mulloy"))

(constraint (= (f "Trinidad Mulloy") "Mulloy"))

(constraint (= (f "Trinidad Mulloy") "Mulloy"))

(constraint (= (f "Carlene Garrard") "Garrard"))

(constraint (= (f "Carlene Garrard") "Garrard"))

(constraint (= (f "Carlene Garrard") "Garrard"))

(constraint (= (f "Melodi Chism") "Chism"))

(constraint (= (f "Melodi Chism") "Chism"))

(constraint (= (f "Melodi Chism") "Chism"))

(constraint (= (f "Bess Chilcott") "Chilcott"))

(constraint (= (f "Bess Chilcott") "Chilcott"))

(constraint (= (f "Bess Chilcott") "Chilcott"))

(constraint (= (f "Chong Aylward") "Aylward"))

(constraint (= (f "Chong Aylward") "Aylward"))

(constraint (= (f "Chong Aylward") "Aylward"))

(constraint (= (f "Jani Ramthun") "Ramthun"))

(constraint (= (f "Jani Ramthun") "Ramthun"))

(constraint (= (f "Jani Ramthun") "Ramthun"))

(constraint (= (f "Jacquiline Heintz") "Heintz"))

(constraint (= (f "Jacquiline Heintz") "Heintz"))

(constraint (= (f "Jacquiline Heintz") "Heintz"))

(constraint (= (f "Hayley Marquess") "Marquess"))

(constraint (= (f "Hayley Marquess") "Marquess"))

(constraint (= (f "Hayley Marquess") "Marquess"))

(constraint (= (f "Andria Spagnoli") "Spagnoli"))

(constraint (= (f "Andria Spagnoli") "Spagnoli"))

(constraint (= (f "Andria Spagnoli") "Spagnoli"))

(constraint (= (f "Irwin Covelli") "Covelli"))

(constraint (= (f "Irwin Covelli") "Covelli"))

(constraint (= (f "Irwin Covelli") "Covelli"))

(constraint (= (f "Gertude Montiel") "Montiel"))

(constraint (= (f "Gertude Montiel") "Montiel"))

(constraint (= (f "Gertude Montiel") "Montiel"))

(constraint (= (f "Stefany Reily") "Reily"))

(constraint (= (f "Stefany Reily") "Reily"))

(constraint (= (f "Stefany Reily") "Reily"))

(constraint (= (f "Rae Mcgaughey") "Mcgaughey"))

(constraint (= (f "Rae Mcgaughey") "Mcgaughey"))

(constraint (= (f "Rae Mcgaughey") "Mcgaughey"))

(constraint (= (f "Cruz Latimore") "Latimore"))

(constraint (= (f "Cruz Latimore") "Latimore"))

(constraint (= (f "Cruz Latimore") "Latimore"))

(constraint (= (f "Maryann Casler") "Casler"))

(constraint (= (f "Maryann Casler") "Casler"))

(constraint (= (f "Maryann Casler") "Casler"))

(constraint (= (f "Annalisa Gregori") "Gregori"))

(constraint (= (f "Annalisa Gregori") "Gregori"))

(constraint (= (f "Annalisa Gregori") "Gregori"))

(constraint (= (f "Jenee Pannell") "Pannell"))

(constraint (= (f "Jenee Pannell") "Pannell"))

(constraint (= (f "Jenee Pannell") "Pannell"))

(constraint (= (f "Launa Withers") "Withers"))

(constraint (= (f "Lakenya Edison") "Edison"))

(constraint (= (f "Brendan Hage") "Hage"))

(constraint (= (f "Bradford Lango") "Lango"))

(constraint (= (f "Rudolf Akiyama") "Akiyama"))

(constraint (= (f "Lara Constable") "Constable"))

(constraint (= (f "Madelaine Ghoston") "Ghoston"))

(constraint (= (f "Salley Hornak") "Hornak"))

(constraint (= (f "Micha Junkin") "Junkin"))

(constraint (= (f "Teddy Bobo") "Bobo"))

(constraint (= (f "Coralee Scalia") "Scalia"))

(constraint (= (f "Jeff Quashie") "Quashie"))

(constraint (= (f "Vena Babiarz") "Babiarz"))

(constraint (= (f "Karrie Lain") "Lain"))

(constraint (= (f "Tobias Dermody") "Dermody"))

(constraint (= (f "Celsa Hopkins") "Hopkins"))

(constraint (= (f "Kimberley Halpern") "Halpern"))

(constraint (= (f "Phillip Rowden") "Rowden"))

(constraint (= (f "Elias Neil") "Neil"))

(constraint (= (f "Lashanda Cortes") "Cortes"))

(constraint (= (f "Mackenzie Spell") "Spell"))

(constraint (= (f "Kathlyn Eccleston") "Eccleston"))

(constraint (= (f "Georgina Brescia") "Brescia"))

(constraint (= (f "Beata Miah") "Miah"))

(constraint (= (f "Desiree Seamons") "Seamons"))

(constraint (= (f "Jeanice Soderstrom") "Soderstrom"))

(constraint (= (f "Mariel Jurgens") "Jurgens"))

(constraint (= (f "Alida Bogle") "Bogle"))

(constraint (= (f "Jacqualine Olague") "Olague"))

(constraint (= (f "Joaquin Clasen") "Clasen"))

(constraint (= (f "Samuel Richert") "Richert"))

(constraint (= (f "Malissa Marcus") "Marcus"))

(constraint (= (f "Alaina Partida") "Partida"))

(constraint (= (f "Trinidad Mulloy") "Mulloy"))

(constraint (= (f "Carlene Garrard") "Garrard"))

(constraint (= (f "Melodi Chism") "Chism"))

(constraint (= (f "Bess Chilcott") "Chilcott"))

(constraint (= (f "Chong Aylward") "Aylward"))

(constraint (= (f "Jani Ramthun") "Ramthun"))

(constraint (= (f "Jacquiline Heintz") "Heintz"))

(constraint (= (f "Hayley Marquess") "Marquess"))

(constraint (= (f "Andria Spagnoli") "Spagnoli"))

(constraint (= (f "Irwin Covelli") "Covelli"))

(constraint (= (f "Gertude Montiel") "Montiel"))

(constraint (= (f "Stefany Reily") "Reily"))

(constraint (= (f "Rae Mcgaughey") "Mcgaughey"))

(constraint (= (f "Cruz Latimore") "Latimore"))

(constraint (= (f "Maryann Casler") "Casler"))

(constraint (= (f "Annalisa Gregori") "Gregori"))

(constraint (= (f "Jenee Pannell") "Pannell"))

 

(check-synth)
