# Supplementary material
Source: ML conference proceedings conference paper supplement (https://proceedings.neurips.cc/paper_files/paper/2022/hash/0113ef4642264adc2e6924a3cbbdf532-Abstract.html)
Supplement: Supplementary file 1 [file 0113ef4642264adc2e6924a3cbbdf532-Supplemental-Conference.zip › neurips_supplementary_cameraready/ec-master/PBE_Strings_Track/name-combine-4-long-repeat.sl]

(set-logic SLIA)

 

(synth-fun f ((firstname String) (lastname String)) String

    ((Start String (ntString))

     (ntString String (firstname lastname "," " " "."

                       (str.++ ntString ntString)

                       (str.replace ntString ntString ntString)

                       (str.at ntString ntInt)

                       (int.to.str ntInt)

                       (str.substr ntString ntInt ntInt)))

      (ntInt Int (0 1 2

                  (+ ntInt ntInt)

                  (- ntInt ntInt)

                  (str.len ntString)

                  (str.to.int ntString)

                  (str.indexof ntString ntString ntInt)))

      (ntBool Bool (true false

                    (str.prefixof ntString ntString)

                    (str.suffixof ntString ntString)

                    (str.contains ntString ntString)))))


(declare-var name String)


(constraint (= (f "Launa" "Withers") "Withers, L."))

(constraint (= (f "Launa" "Withers") "Withers, L."))

(constraint (= (f "Launa" "Withers") "Withers, L."))

(constraint (= (f "Lakenya" "Edison") "Edison, L."))

(constraint (= (f "Lakenya" "Edison") "Edison, L."))

(constraint (= (f "Lakenya" "Edison") "Edison, L."))

(constraint (= (f "Brendan" "Hage") "Hage, B."))

(constraint (= (f "Brendan" "Hage") "Hage, B."))

(constraint (= (f "Brendan" "Hage") "Hage, B."))

(constraint (= (f "Bradford" "Lango") "Lango, B."))

(constraint (= (f "Bradford" "Lango") "Lango, B."))

(constraint (= (f "Bradford" "Lango") "Lango, B."))

(constraint (= (f "Rudolf" "Akiyama") "Akiyama, R."))

(constraint (= (f "Rudolf" "Akiyama") "Akiyama, R."))

(constraint (= (f "Rudolf" "Akiyama") "Akiyama, R."))

(constraint (= (f "Lara" "Constable") "Constable, L."))

(constraint (= (f "Lara" "Constable") "Constable, L."))

(constraint (= (f "Lara" "Constable") "Constable, L."))

(constraint (= (f "Madelaine" "Ghoston") "Ghoston, M."))

(constraint (= (f "Madelaine" "Ghoston") "Ghoston, M."))

(constraint (= (f "Madelaine" "Ghoston") "Ghoston, M."))

(constraint (= (f "Salley" "Hornak") "Hornak, S."))

(constraint (= (f "Salley" "Hornak") "Hornak, S."))

(constraint (= (f "Salley" "Hornak") "Hornak, S."))

(constraint (= (f "Micha" "Junkin") "Junkin, M."))

(constraint (= (f "Micha" "Junkin") "Junkin, M."))

(constraint (= (f "Micha" "Junkin") "Junkin, M."))

(constraint (= (f "Teddy" "Bobo") "Bobo, T."))

(constraint (= (f "Teddy" "Bobo") "Bobo, T."))

(constraint (= (f "Teddy" "Bobo") "Bobo, T."))

(constraint (= (f "Coralee" "Scalia") "Scalia, C."))

(constraint (= (f "Coralee" "Scalia") "Scalia, C."))

(constraint (= (f "Coralee" "Scalia") "Scalia, C."))

(constraint (= (f "Jeff" "Quashie") "Quashie, J."))

(constraint (= (f "Jeff" "Quashie") "Quashie, J."))

(constraint (= (f "Jeff" "Quashie") "Quashie, J."))

(constraint (= (f "Vena" "Babiarz") "Babiarz, V."))

(constraint (= (f "Vena" "Babiarz") "Babiarz, V."))

(constraint (= (f "Vena" "Babiarz") "Babiarz, V."))

(constraint (= (f "Karrie" "Lain") "Lain, K."))

(constraint (= (f "Karrie" "Lain") "Lain, K."))

(constraint (= (f "Karrie" "Lain") "Lain, K."))

(constraint (= (f "Tobias" "Dermody") "Dermody, T."))

(constraint (= (f "Tobias" "Dermody") "Dermody, T."))

(constraint (= (f "Tobias" "Dermody") "Dermody, T."))

(constraint (= (f "Celsa" "Hopkins") "Hopkins, C."))

(constraint (= (f "Celsa" "Hopkins") "Hopkins, C."))

(constraint (= (f "Celsa" "Hopkins") "Hopkins, C."))

(constraint (= (f "Kimberley" "Halpern") "Halpern, K."))

(constraint (= (f "Kimberley" "Halpern") "Halpern, K."))

(constraint (= (f "Kimberley" "Halpern") "Halpern, K."))

(constraint (= (f "Phillip" "Rowden") "Rowden, P."))

(constraint (= (f "Phillip" "Rowden") "Rowden, P."))

(constraint (= (f "Phillip" "Rowden") "Rowden, P."))

(constraint (= (f "Elias" "Neil") "Neil, E."))

(constraint (= (f "Elias" "Neil") "Neil, E."))

(constraint (= (f "Elias" "Neil") "Neil, E."))

(constraint (= (f "Lashanda" "Cortes") "Cortes, L."))

(constraint (= (f "Lashanda" "Cortes") "Cortes, L."))

(constraint (= (f "Lashanda" "Cortes") "Cortes, L."))

(constraint (= (f "Mackenzie" "Spell") "Spell, M."))

(constraint (= (f "Mackenzie" "Spell") "Spell, M."))

(constraint (= (f "Mackenzie" "Spell") "Spell, M."))

(constraint (= (f "Kathlyn" "Eccleston") "Eccleston, K."))

(constraint (= (f "Kathlyn" "Eccleston") "Eccleston, K."))

(constraint (= (f "Kathlyn" "Eccleston") "Eccleston, K."))

(constraint (= (f "Georgina" "Brescia") "Brescia, G."))

(constraint (= (f "Georgina" "Brescia") "Brescia, G."))

(constraint (= (f "Georgina" "Brescia") "Brescia, G."))

(constraint (= (f "Beata" "Miah") "Miah, B."))

(constraint (= (f "Beata" "Miah") "Miah, B."))

(constraint (= (f "Beata" "Miah") "Miah, B."))

(constraint (= (f "Desiree" "Seamons") "Seamons, D."))

(constraint (= (f "Desiree" "Seamons") "Seamons, D."))

(constraint (= (f "Desiree" "Seamons") "Seamons, D."))

(constraint (= (f "Jeanice" "Soderstrom") "Soderstrom, J."))

(constraint (= (f "Jeanice" "Soderstrom") "Soderstrom, J."))

(constraint (= (f "Jeanice" "Soderstrom") "Soderstrom, J."))

(constraint (= (f "Mariel" "Jurgens") "Jurgens, M."))

(constraint (= (f "Mariel" "Jurgens") "Jurgens, M."))

(constraint (= (f "Mariel" "Jurgens") "Jurgens, M."))

(constraint (= (f "Alida" "Bogle") "Bogle, A."))

(constraint (= (f "Alida" "Bogle") "Bogle, A."))

(constraint (= (f "Alida" "Bogle") "Bogle, A."))

(constraint (= (f "Jacqualine" "Olague") "Olague, J."))

(constraint (= (f "Jacqualine" "Olague") "Olague, J."))

(constraint (= (f "Jacqualine" "Olague") "Olague, J."))

(constraint (= (f "Joaquin" "Clasen") "Clasen, J."))

(constraint (= (f "Joaquin" "Clasen") "Clasen, J."))

(constraint (= (f "Joaquin" "Clasen") "Clasen, J."))

(constraint (= (f "Samuel" "Richert") "Richert, S."))

(constraint (= (f "Samuel" "Richert") "Richert, S."))

(constraint (= (f "Samuel" "Richert") "Richert, S."))

(constraint (= (f "Malissa" "Marcus") "Marcus, M."))

(constraint (= (f "Malissa" "Marcus") "Marcus, M."))

(constraint (= (f "Malissa" "Marcus") "Marcus, M."))

(constraint (= (f "Alaina" "Partida") "Partida, A."))

(constraint (= (f "Alaina" "Partida") "Partida, A."))

(constraint (= (f "Alaina" "Partida") "Partida, A."))

(constraint (= (f "Trinidad" "Mulloy") "Mulloy, T."))

(constraint (= (f "Trinidad" "Mulloy") "Mulloy, T."))

(constraint (= (f "Trinidad" "Mulloy") "Mulloy, T."))

(constraint (= (f "Carlene" "Garrard") "Garrard, C."))

(constraint (= (f "Carlene" "Garrard") "Garrard, C."))

(constraint (= (f "Carlene" "Garrard") "Garrard, C."))

(constraint (= (f "Melodi" "Chism") "Chism, M."))

(constraint (= (f "Melodi" "Chism") "Chism, M."))

(constraint (= (f "Melodi" "Chism") "Chism, M."))

(constraint (= (f "Bess" "Chilcott") "Chilcott, B."))

(constraint (= (f "Bess" "Chilcott") "Chilcott, B."))

(constraint (= (f "Bess" "Chilcott") "Chilcott, B."))

(constraint (= (f "Chong" "Aylward") "Aylward, C."))

(constraint (= (f "Chong" "Aylward") "Aylward, C."))

(constraint (= (f "Chong" "Aylward") "Aylward, C."))

(constraint (= (f "Jani" "Ramthun") "Ramthun, J."))

(constraint (= (f "Jani" "Ramthun") "Ramthun, J."))

(constraint (= (f "Jani" "Ramthun") "Ramthun, J."))

(constraint (= (f "Jacquiline" "Heintz") "Heintz, J."))

(constraint (= (f "Jacquiline" "Heintz") "Heintz, J."))

(constraint (= (f "Jacquiline" "Heintz") "Heintz, J."))

(constraint (= (f "Hayley" "Marquess") "Marquess, H."))

(constraint (= (f "Hayley" "Marquess") "Marquess, H."))

(constraint (= (f "Hayley" "Marquess") "Marquess, H."))

(constraint (= (f "Andria" "Spagnoli") "Spagnoli, A."))

(constraint (= (f "Andria" "Spagnoli") "Spagnoli, A."))

(constraint (= (f "Andria" "Spagnoli") "Spagnoli, A."))

(constraint (= (f "Irwin" "Covelli") "Covelli, I."))

(constraint (= (f "Irwin" "Covelli") "Covelli, I."))

(constraint (= (f "Irwin" "Covelli") "Covelli, I."))

(constraint (= (f "Gertude" "Montiel") "Montiel, G."))

(constraint (= (f "Gertude" "Montiel") "Montiel, G."))

(constraint (= (f "Gertude" "Montiel") "Montiel, G."))

(constraint (= (f "Stefany" "Reily") "Reily, S."))

(constraint (= (f "Stefany" "Reily") "Reily, S."))

(constraint (= (f "Stefany" "Reily") "Reily, S."))

(constraint (= (f "Rae" "Mcgaughey") "Mcgaughey, R."))

(constraint (= (f "Rae" "Mcgaughey") "Mcgaughey, R."))

(constraint (= (f "Rae" "Mcgaughey") "Mcgaughey, R."))

(constraint (= (f "Cruz" "Latimore") "Latimore, C."))

(constraint (= (f "Cruz" "Latimore") "Latimore, C."))

(constraint (= (f "Cruz" "Latimore") "Latimore, C."))

(constraint (= (f "Maryann" "Casler") "Casler, M."))

(constraint (= (f "Maryann" "Casler") "Casler, M."))

(constraint (= (f "Maryann" "Casler") "Casler, M."))

(constraint (= (f "Annalisa" "Gregori") "Gregori, A."))

(constraint (= (f "Annalisa" "Gregori") "Gregori, A."))

(constraint (= (f "Annalisa" "Gregori") "Gregori, A."))

(constraint (= (f "Jenee" "Pannell") "Pannell, J."))

(constraint (= (f "Jenee" "Pannell") "Pannell, J."))

(constraint (= (f "Jenee" "Pannell") "Pannell, J."))

(constraint (= (f "Launa" "Withers") "Withers, L."))

(constraint (= (f "Lakenya" "Edison") "Edison, L."))

(constraint (= (f "Brendan" "Hage") "Hage, B."))

(constraint (= (f "Bradford" "Lango") "Lango, B."))

(constraint (= (f "Rudolf" "Akiyama") "Akiyama, R."))

(constraint (= (f "Lara" "Constable") "Constable, L."))

(constraint (= (f "Madelaine" "Ghoston") "Ghoston, M."))

(constraint (= (f "Salley" "Hornak") "Hornak, S."))

(constraint (= (f "Micha" "Junkin") "Junkin, M."))

(constraint (= (f "Teddy" "Bobo") "Bobo, T."))

(constraint (= (f "Coralee" "Scalia") "Scalia, C."))

(constraint (= (f "Jeff" "Quashie") "Quashie, J."))

(constraint (= (f "Vena" "Babiarz") "Babiarz, V."))

(constraint (= (f "Karrie" "Lain") "Lain, K."))

(constraint (= (f "Tobias" "Dermody") "Dermody, T."))

(constraint (= (f "Celsa" "Hopkins") "Hopkins, C."))

(constraint (= (f "Kimberley" "Halpern") "Halpern, K."))

(constraint (= (f "Phillip" "Rowden") "Rowden, P."))

(constraint (= (f "Elias" "Neil") "Neil, E."))

(constraint (= (f "Lashanda" "Cortes") "Cortes, L."))

(constraint (= (f "Mackenzie" "Spell") "Spell, M."))

(constraint (= (f "Kathlyn" "Eccleston") "Eccleston, K."))

(constraint (= (f "Georgina" "Brescia") "Brescia, G."))

(constraint (= (f "Beata" "Miah") "Miah, B."))

(constraint (= (f "Desiree" "Seamons") "Seamons, D."))

(constraint (= (f "Jeanice" "Soderstrom") "Soderstrom, J."))

(constraint (= (f "Mariel" "Jurgens") "Jurgens, M."))

(constraint (= (f "Alida" "Bogle") "Bogle, A."))

(constraint (= (f "Jacqualine" "Olague") "Olague, J."))

(constraint (= (f "Joaquin" "Clasen") "Clasen, J."))

(constraint (= (f "Samuel" "Richert") "Richert, S."))

(constraint (= (f "Malissa" "Marcus") "Marcus, M."))

(constraint (= (f "Alaina" "Partida") "Partida, A."))

(constraint (= (f "Trinidad" "Mulloy") "Mulloy, T."))

(constraint (= (f "Carlene" "Garrard") "Garrard, C."))

(constraint (= (f "Melodi" "Chism") "Chism, M."))

(constraint (= (f "Bess" "Chilcott") "Chilcott, B."))

(constraint (= (f "Chong" "Aylward") "Aylward, C."))

(constraint (= (f "Jani" "Ramthun") "Ramthun, J."))

(constraint (= (f "Jacquiline" "Heintz") "Heintz, J."))

(constraint (= (f "Hayley" "Marquess") "Marquess, H."))

(constraint (= (f "Andria" "Spagnoli") "Spagnoli, A."))

(constraint (= (f "Irwin" "Covelli") "Covelli, I."))

(constraint (= (f "Gertude" "Montiel") "Montiel, G."))

(constraint (= (f "Stefany" "Reily") "Reily, S."))

(constraint (= (f "Rae" "Mcgaughey") "Mcgaughey, R."))

(constraint (= (f "Cruz" "Latimore") "Latimore, C."))

(constraint (= (f "Maryann" "Casler") "Casler, M."))

(constraint (= (f "Annalisa" "Gregori") "Gregori, A."))

(constraint (= (f "Jenee" "Pannell") "Pannell, J."))

 

(check-synth)
