# Supplementary material
Source: ML conference proceedings conference paper supplement (https://proceedings.neurips.cc/paper_files/paper/2022/hash/0113ef4642264adc2e6924a3cbbdf532-Abstract.html)
Supplement: Supplementary file 1 [file 0113ef4642264adc2e6924a3cbbdf532-Supplemental-Conference.zip › neurips_supplementary_cameraready/ec-master/PBE_Strings_Track/phone-7-long.sl]

(set-logic SLIA)

 

(synth-fun f ((name String)) String

    ((Start String (ntString))

     (ntString String (name " " "+" "-" "."

                       (str.++ ntString ntString)

                       (str.replace ntString ntString ntString)

                       (str.at ntString ntInt)

                       (int.to.str ntInt)

                       (str.substr ntString ntInt ntInt)))

      (ntInt Int (0 1 2 3 4 5

                  (+ ntInt ntInt)

                  (- ntInt ntInt)

                  (str.len ntString)

                  (str.to.int ntString)

                  (str.indexof ntString ntString ntInt)))

      (ntBool Bool (true false

                    (str.prefixof ntString ntString)

                    (str.suffixof ntString ntString)

                    (str.contains ntString ntString)))))


(declare-var name String)


(constraint (= (f "+106 769-858-438") "858"))

(constraint (= (f "+83 973-757-831") "757"))

(constraint (= (f "+62 647-787-775") "787"))

(constraint (= (f "+172 027-507-632") "507"))

(constraint (= (f "+72 001-050-856") "050"))

(constraint (= (f "+95 310-537-401") "537"))

(constraint (= (f "+6 775-969-238") "969"))

(constraint (= (f "+174 594-539-946") "539"))

(constraint (= (f "+155 927-275-860") "275"))

(constraint (= (f "+167 405-461-331") "461"))

(constraint (= (f "+10 538-347-401") "347"))

(constraint (= (f "+60 971-986-103") "986"))

(constraint (= (f "+13 258-276-941") "276"))

(constraint (= (f "+2 604-746-137") "746"))

(constraint (= (f "+25 998-898-180") "898"))

(constraint (= (f "+151 862-946-541") "946"))

(constraint (= (f "+118 165-041-038") "041"))

(constraint (= (f "+144 170-592-272") "592"))

(constraint (= (f "+94 462-008-482") "008"))

(constraint (= (f "+82 685-122-086") "122"))

(constraint (= (f "+82 675-366-472") "366"))

(constraint (= (f "+80 066-433-096") "433"))

(constraint (= (f "+163 039-436-166") "436"))

(constraint (= (f "+138 808-083-074") "083"))

(constraint (= (f "+42 643-245-738") "245"))

(constraint (= (f "+169 822-542-726") "542"))

(constraint (= (f "+176 767-782-369") "782"))

(constraint (= (f "+47 414-369-343") "369"))

(constraint (= (f "+138 885-618-512") "618"))

(constraint (= (f "+104 158-671-355") "671"))

(constraint (= (f "+188 280-087-526") "087"))

(constraint (= (f "+50 268-571-336") "571"))

(constraint (= (f "+183 225-960-024") "960"))

(constraint (= (f "+58 191-982-491") "982"))

(constraint (= (f "+9 507-092-535") "092"))

(constraint (= (f "+64 061-601-398") "601"))

(constraint (= (f "+189 831-591-877") "591"))

(constraint (= (f "+129 425-765-844") "765"))

(constraint (= (f "+94 856-734-046") "734"))

(constraint (= (f "+35 082-845-261") "845"))

(constraint (= (f "+185 394-622-272") "622"))

(constraint (= (f "+163 905-707-740") "707"))

(constraint (= (f "+23 448-213-807") "213"))

(constraint (= (f "+42 634-077-089") "077"))

(constraint (= (f "+18 051-287-382") "287"))

(constraint (= (f "+29 773-545-520") "545"))

(constraint (= (f "+43 249-097-743") "097"))

(constraint (= (f "+158 674-736-891") "736"))

(constraint (= (f "+45 124-771-454") "771"))

(constraint (= (f "+180 029-457-654") "457"))

(constraint (= (f "+75 227-250-652") "250"))

(constraint (= (f "+5 528-317-854") "317"))

(constraint (= (f "+81 849-629-290") "629"))

(constraint (= (f "+46 005-119-176") "119"))

(constraint (= (f "+108 150-380-705") "380"))

(constraint (= (f "+40 122-224-247") "224"))

(constraint (= (f "+68 890-680-027") "680"))

(constraint (= (f "+169 060-204-504") "204"))

(constraint (= (f "+95 620-820-945") "820"))

(constraint (= (f "+43 592-938-846") "938"))

(constraint (= (f "+7 023-296-647") "296"))

(constraint (= (f "+20 541-401-396") "401"))

(constraint (= (f "+64 751-365-934") "365"))

(constraint (= (f "+163 546-119-476") "119"))

(constraint (= (f "+198 557-666-779") "666"))

(constraint (= (f "+14 673-759-017") "759"))

(constraint (= (f "+161 086-020-168") "020"))

(constraint (= (f "+65 970-575-488") "575"))

(constraint (= (f "+2 455-126-377") "126"))

(constraint (= (f "+196 728-585-376") "585"))

(constraint (= (f "+33 117-430-125") "430"))

(constraint (= (f "+195 488-831-768") "831"))

(constraint (= (f "+86 468-718-108") "718"))

(constraint (= (f "+194 278-716-950") "716"))

(constraint (= (f "+43 730-685-847") "685"))

(constraint (= (f "+140 794-289-551") "289"))

(constraint (= (f "+21 679-740-834") "740"))

(constraint (= (f "+98 717-997-323") "997"))

(constraint (= (f "+47 401-100-231") "100"))

(constraint (= (f "+143 726-462-368") "462"))

(constraint (= (f "+147 864-005-968") "005"))

(constraint (= (f "+130 590-757-665") "757"))

(constraint (= (f "+197 700-858-976") "858"))

(constraint (= (f "+158 344-541-946") "541"))

(constraint (= (f "+56 242-901-234") "901"))

(constraint (= (f "+132 313-075-754") "075"))

(constraint (= (f "+130 517-953-149") "953"))

(constraint (= (f "+158 684-878-743") "878"))

(constraint (= (f "+52 836-582-035") "582"))

(constraint (= (f "+138 117-484-671") "484"))

(constraint (= (f "+50 012-148-873") "148"))

(constraint (= (f "+105 048-919-483") "919"))

(constraint (= (f "+18 209-851-997") "851"))

(constraint (= (f "+176 938-056-084") "056"))

(constraint (= (f "+141 018-132-973") "132"))

(constraint (= (f "+199 936-162-415") "162"))

(constraint (= (f "+33 547-051-264") "051"))

(constraint (= (f "+161 233-981-513") "981"))

(constraint (= (f "+115 101-728-328") "728"))

(constraint (= (f "+45 095-746-635") "746"))


(check-synth)
