# Supplementary material
Source: ML conference proceedings conference paper supplement (https://proceedings.neurips.cc/paper_files/paper/2022/hash/0113ef4642264adc2e6924a3cbbdf532-Abstract.html)
Supplement: Supplementary file 1 [file 0113ef4642264adc2e6924a3cbbdf532-Supplemental-Conference.zip › neurips_supplementary_cameraready/ec-master/PBE_Strings_Track/phone-7.sl]

(set-logic SLIA)

 

(synth-fun f ((name String)) String

    ((Start String (ntString))

     (ntString String (name " " "+" "-" "."

                       (str.++ ntString ntString)

                       (str.replace ntString ntString ntString)

                       (str.at ntString ntInt)

                       (int.to.str ntInt)

                       (str.substr ntString ntInt ntInt)))

      (ntInt Int (0 1 2 3 4 5

                  (+ ntInt ntInt)

                  (- ntInt ntInt)

                  (str.len ntString)

                  (str.to.int ntString)

                  (str.indexof ntString ntString ntInt)))

      (ntBool Bool (true false

                    (str.prefixof ntString ntString)

                    (str.suffixof ntString ntString)

                    (str.contains ntString ntString)))))


(declare-var name String)


(constraint (= (f "+106 769-858-438") "858"))

(constraint (= (f "+83 973-757-831") "757"))

(constraint (= (f "+62 647-787-775") "787"))

(constraint (= (f "+172 027-507-632") "507"))

(constraint (= (f "+72 001-050-856") "050"))

(constraint (= (f "+95 310-537-401") "537"))

(constraint (= (f "+6 775-969-238") "969"))


(check-synth)
