# Supplementary material
Source: ML conference proceedings conference paper supplement (https://proceedings.neurips.cc/paper_files/paper/2022/hash/0113ef4642264adc2e6924a3cbbdf532-Abstract.html)
Supplement: Supplementary file 1 [file 0113ef4642264adc2e6924a3cbbdf532-Supplemental-Conference.zip › neurips_supplementary_cameraready/ec-master/PBE_Strings_Track/phone-9-long-repeat.sl]

(set-logic SLIA)

 

(synth-fun f ((name String)) String

    ((Start String (ntString))

     (ntString String (name " " "+" "-" "."

                       (str.++ ntString ntString)

                       (str.replace ntString ntString ntString)

                       (str.at ntString ntInt)

                       (int.to.str ntInt)

                       (str.substr ntString ntInt ntInt)))

      (ntInt Int (0 1 2 3 4 5

                  (+ ntInt ntInt)

                  (- ntInt ntInt)

                  (str.len ntString)

                  (str.to.int ntString)

                  (str.indexof ntString ntString ntInt)))

      (ntBool Bool (true false

                    (str.prefixof ntString ntString)

                    (str.suffixof ntString ntString)

                    (str.contains ntString ntString)))))


(declare-var name String)


(constraint (= (f "+106 769-858-438") "106.769.858.438"))

(constraint (= (f "+106 769-858-438") "106.769.858.438"))

(constraint (= (f "+106 769-858-438") "106.769.858.438"))

(constraint (= (f "+83 973-757-831") "83.973.757.831"))

(constraint (= (f "+83 973-757-831") "83.973.757.831"))

(constraint (= (f "+83 973-757-831") "83.973.757.831"))

(constraint (= (f "+62 647-787-775") "62.647.787.775"))

(constraint (= (f "+62 647-787-775") "62.647.787.775"))

(constraint (= (f "+62 647-787-775") "62.647.787.775"))

(constraint (= (f "+172 027-507-632") "172.027.507.632"))

(constraint (= (f "+172 027-507-632") "172.027.507.632"))

(constraint (= (f "+172 027-507-632") "172.027.507.632"))

(constraint (= (f "+72 001-050-856") "72.001.050.856"))

(constraint (= (f "+72 001-050-856") "72.001.050.856"))

(constraint (= (f "+72 001-050-856") "72.001.050.856"))

(constraint (= (f "+95 310-537-401") "95.310.537.401"))

(constraint (= (f "+95 310-537-401") "95.310.537.401"))

(constraint (= (f "+95 310-537-401") "95.310.537.401"))

(constraint (= (f "+6 775-969-238") "6.775.969.238"))

(constraint (= (f "+6 775-969-238") "6.775.969.238"))

(constraint (= (f "+6 775-969-238") "6.775.969.238"))

(constraint (= (f "+174 594-539-946") "174.594.539.946"))

(constraint (= (f "+174 594-539-946") "174.594.539.946"))

(constraint (= (f "+174 594-539-946") "174.594.539.946"))

(constraint (= (f "+155 927-275-860") "155.927.275.860"))

(constraint (= (f "+155 927-275-860") "155.927.275.860"))

(constraint (= (f "+155 927-275-860") "155.927.275.860"))

(constraint (= (f "+167 405-461-331") "167.405.461.331"))

(constraint (= (f "+167 405-461-331") "167.405.461.331"))

(constraint (= (f "+167 405-461-331") "167.405.461.331"))

(constraint (= (f "+10 538-347-401") "10.538.347.401"))

(constraint (= (f "+10 538-347-401") "10.538.347.401"))

(constraint (= (f "+10 538-347-401") "10.538.347.401"))

(constraint (= (f "+60 971-986-103") "60.971.986.103"))

(constraint (= (f "+60 971-986-103") "60.971.986.103"))

(constraint (= (f "+60 971-986-103") "60.971.986.103"))

(constraint (= (f "+13 258-276-941") "13.258.276.941"))

(constraint (= (f "+13 258-276-941") "13.258.276.941"))

(constraint (= (f "+13 258-276-941") "13.258.276.941"))

(constraint (= (f "+2 604-746-137") "2.604.746.137"))

(constraint (= (f "+2 604-746-137") "2.604.746.137"))

(constraint (= (f "+2 604-746-137") "2.604.746.137"))

(constraint (= (f "+25 998-898-180") "25.998.898.180"))

(constraint (= (f "+25 998-898-180") "25.998.898.180"))

(constraint (= (f "+25 998-898-180") "25.998.898.180"))

(constraint (= (f "+151 862-946-541") "151.862.946.541"))

(constraint (= (f "+151 862-946-541") "151.862.946.541"))

(constraint (= (f "+151 862-946-541") "151.862.946.541"))

(constraint (= (f "+118 165-041-038") "118.165.041.038"))

(constraint (= (f "+118 165-041-038") "118.165.041.038"))

(constraint (= (f "+118 165-041-038") "118.165.041.038"))

(constraint (= (f "+144 170-592-272") "144.170.592.272"))

(constraint (= (f "+144 170-592-272") "144.170.592.272"))

(constraint (= (f "+144 170-592-272") "144.170.592.272"))

(constraint (= (f "+94 462-008-482") "94.462.008.482"))

(constraint (= (f "+94 462-008-482") "94.462.008.482"))

(constraint (= (f "+94 462-008-482") "94.462.008.482"))

(constraint (= (f "+82 685-122-086") "82.685.122.086"))

(constraint (= (f "+82 685-122-086") "82.685.122.086"))

(constraint (= (f "+82 685-122-086") "82.685.122.086"))

(constraint (= (f "+82 675-366-472") "82.675.366.472"))

(constraint (= (f "+82 675-366-472") "82.675.366.472"))

(constraint (= (f "+82 675-366-472") "82.675.366.472"))

(constraint (= (f "+80 066-433-096") "80.066.433.096"))

(constraint (= (f "+80 066-433-096") "80.066.433.096"))

(constraint (= (f "+80 066-433-096") "80.066.433.096"))

(constraint (= (f "+163 039-436-166") "163.039.436.166"))

(constraint (= (f "+163 039-436-166") "163.039.436.166"))

(constraint (= (f "+163 039-436-166") "163.039.436.166"))

(constraint (= (f "+138 808-083-074") "138.808.083.074"))

(constraint (= (f "+138 808-083-074") "138.808.083.074"))

(constraint (= (f "+138 808-083-074") "138.808.083.074"))

(constraint (= (f "+42 643-245-738") "42.643.245.738"))

(constraint (= (f "+42 643-245-738") "42.643.245.738"))

(constraint (= (f "+42 643-245-738") "42.643.245.738"))

(constraint (= (f "+169 822-542-726") "169.822.542.726"))

(constraint (= (f "+169 822-542-726") "169.822.542.726"))

(constraint (= (f "+169 822-542-726") "169.822.542.726"))

(constraint (= (f "+176 767-782-369") "176.767.782.369"))

(constraint (= (f "+176 767-782-369") "176.767.782.369"))

(constraint (= (f "+176 767-782-369") "176.767.782.369"))

(constraint (= (f "+47 414-369-343") "47.414.369.343"))

(constraint (= (f "+47 414-369-343") "47.414.369.343"))

(constraint (= (f "+47 414-369-343") "47.414.369.343"))

(constraint (= (f "+138 885-618-512") "138.885.618.512"))

(constraint (= (f "+138 885-618-512") "138.885.618.512"))

(constraint (= (f "+138 885-618-512") "138.885.618.512"))

(constraint (= (f "+104 158-671-355") "104.158.671.355"))

(constraint (= (f "+104 158-671-355") "104.158.671.355"))

(constraint (= (f "+104 158-671-355") "104.158.671.355"))

(constraint (= (f "+188 280-087-526") "188.280.087.526"))

(constraint (= (f "+188 280-087-526") "188.280.087.526"))

(constraint (= (f "+188 280-087-526") "188.280.087.526"))

(constraint (= (f "+50 268-571-336") "50.268.571.336"))

(constraint (= (f "+50 268-571-336") "50.268.571.336"))

(constraint (= (f "+50 268-571-336") "50.268.571.336"))

(constraint (= (f "+183 225-960-024") "183.225.960.024"))

(constraint (= (f "+183 225-960-024") "183.225.960.024"))

(constraint (= (f "+183 225-960-024") "183.225.960.024"))

(constraint (= (f "+58 191-982-491") "58.191.982.491"))

(constraint (= (f "+58 191-982-491") "58.191.982.491"))

(constraint (= (f "+58 191-982-491") "58.191.982.491"))

(constraint (= (f "+9 507-092-535") "9.507.092.535"))

(constraint (= (f "+9 507-092-535") "9.507.092.535"))

(constraint (= (f "+9 507-092-535") "9.507.092.535"))

(constraint (= (f "+64 061-601-398") "64.061.601.398"))

(constraint (= (f "+64 061-601-398") "64.061.601.398"))

(constraint (= (f "+64 061-601-398") "64.061.601.398"))

(constraint (= (f "+189 831-591-877") "189.831.591.877"))

(constraint (= (f "+189 831-591-877") "189.831.591.877"))

(constraint (= (f "+189 831-591-877") "189.831.591.877"))

(constraint (= (f "+129 425-765-844") "129.425.765.844"))

(constraint (= (f "+129 425-765-844") "129.425.765.844"))

(constraint (= (f "+129 425-765-844") "129.425.765.844"))

(constraint (= (f "+94 856-734-046") "94.856.734.046"))

(constraint (= (f "+94 856-734-046") "94.856.734.046"))

(constraint (= (f "+94 856-734-046") "94.856.734.046"))

(constraint (= (f "+35 082-845-261") "35.082.845.261"))

(constraint (= (f "+35 082-845-261") "35.082.845.261"))

(constraint (= (f "+35 082-845-261") "35.082.845.261"))

(constraint (= (f "+185 394-622-272") "185.394.622.272"))

(constraint (= (f "+185 394-622-272") "185.394.622.272"))

(constraint (= (f "+185 394-622-272") "185.394.622.272"))

(constraint (= (f "+163 905-707-740") "163.905.707.740"))

(constraint (= (f "+163 905-707-740") "163.905.707.740"))

(constraint (= (f "+163 905-707-740") "163.905.707.740"))

(constraint (= (f "+23 448-213-807") "23.448.213.807"))

(constraint (= (f "+23 448-213-807") "23.448.213.807"))

(constraint (= (f "+23 448-213-807") "23.448.213.807"))

(constraint (= (f "+42 634-077-089") "42.634.077.089"))

(constraint (= (f "+42 634-077-089") "42.634.077.089"))

(constraint (= (f "+42 634-077-089") "42.634.077.089"))

(constraint (= (f "+18 051-287-382") "18.051.287.382"))

(constraint (= (f "+18 051-287-382") "18.051.287.382"))

(constraint (= (f "+18 051-287-382") "18.051.287.382"))

(constraint (= (f "+29 773-545-520") "29.773.545.520"))

(constraint (= (f "+29 773-545-520") "29.773.545.520"))

(constraint (= (f "+29 773-545-520") "29.773.545.520"))

(constraint (= (f "+43 249-097-743") "43.249.097.743"))

(constraint (= (f "+43 249-097-743") "43.249.097.743"))

(constraint (= (f "+43 249-097-743") "43.249.097.743"))

(constraint (= (f "+158 674-736-891") "158.674.736.891"))

(constraint (= (f "+158 674-736-891") "158.674.736.891"))

(constraint (= (f "+158 674-736-891") "158.674.736.891"))

(constraint (= (f "+45 124-771-454") "45.124.771.454"))

(constraint (= (f "+45 124-771-454") "45.124.771.454"))

(constraint (= (f "+45 124-771-454") "45.124.771.454"))

(constraint (= (f "+180 029-457-654") "180.029.457.654"))

(constraint (= (f "+180 029-457-654") "180.029.457.654"))

(constraint (= (f "+180 029-457-654") "180.029.457.654"))

(constraint (= (f "+75 227-250-652") "75.227.250.652"))

(constraint (= (f "+75 227-250-652") "75.227.250.652"))

(constraint (= (f "+75 227-250-652") "75.227.250.652"))

(constraint (= (f "+5 528-317-854") "5.528.317.854"))

(constraint (= (f "+5 528-317-854") "5.528.317.854"))

(constraint (= (f "+5 528-317-854") "5.528.317.854"))

(constraint (= (f "+81 849-629-290") "81.849.629.290"))

(constraint (= (f "+81 849-629-290") "81.849.629.290"))

(constraint (= (f "+81 849-629-290") "81.849.629.290"))

(constraint (= (f "+46 005-119-176") "46.005.119.176"))

(constraint (= (f "+46 005-119-176") "46.005.119.176"))

(constraint (= (f "+46 005-119-176") "46.005.119.176"))

(constraint (= (f "+108 150-380-705") "108.150.380.705"))

(constraint (= (f "+108 150-380-705") "108.150.380.705"))

(constraint (= (f "+108 150-380-705") "108.150.380.705"))

(constraint (= (f "+40 122-224-247") "40.122.224.247"))

(constraint (= (f "+40 122-224-247") "40.122.224.247"))

(constraint (= (f "+40 122-224-247") "40.122.224.247"))

(constraint (= (f "+68 890-680-027") "68.890.680.027"))

(constraint (= (f "+68 890-680-027") "68.890.680.027"))

(constraint (= (f "+68 890-680-027") "68.890.680.027"))

(constraint (= (f "+169 060-204-504") "169.060.204.504"))

(constraint (= (f "+169 060-204-504") "169.060.204.504"))

(constraint (= (f "+169 060-204-504") "169.060.204.504"))

(constraint (= (f "+95 620-820-945") "95.620.820.945"))

(constraint (= (f "+95 620-820-945") "95.620.820.945"))

(constraint (= (f "+95 620-820-945") "95.620.820.945"))

(constraint (= (f "+43 592-938-846") "43.592.938.846"))

(constraint (= (f "+43 592-938-846") "43.592.938.846"))

(constraint (= (f "+43 592-938-846") "43.592.938.846"))

(constraint (= (f "+7 023-296-647") "7.023.296.647"))

(constraint (= (f "+7 023-296-647") "7.023.296.647"))

(constraint (= (f "+7 023-296-647") "7.023.296.647"))

(constraint (= (f "+20 541-401-396") "20.541.401.396"))

(constraint (= (f "+20 541-401-396") "20.541.401.396"))

(constraint (= (f "+20 541-401-396") "20.541.401.396"))

(constraint (= (f "+64 751-365-934") "64.751.365.934"))

(constraint (= (f "+64 751-365-934") "64.751.365.934"))

(constraint (= (f "+64 751-365-934") "64.751.365.934"))

(constraint (= (f "+163 546-119-476") "163.546.119.476"))

(constraint (= (f "+163 546-119-476") "163.546.119.476"))

(constraint (= (f "+163 546-119-476") "163.546.119.476"))

(constraint (= (f "+198 557-666-779") "198.557.666.779"))

(constraint (= (f "+198 557-666-779") "198.557.666.779"))

(constraint (= (f "+198 557-666-779") "198.557.666.779"))

(constraint (= (f "+14 673-759-017") "14.673.759.017"))

(constraint (= (f "+14 673-759-017") "14.673.759.017"))

(constraint (= (f "+14 673-759-017") "14.673.759.017"))

(constraint (= (f "+161 086-020-168") "161.086.020.168"))

(constraint (= (f "+161 086-020-168") "161.086.020.168"))

(constraint (= (f "+161 086-020-168") "161.086.020.168"))

(constraint (= (f "+65 970-575-488") "65.970.575.488"))

(constraint (= (f "+65 970-575-488") "65.970.575.488"))

(constraint (= (f "+65 970-575-488") "65.970.575.488"))

(constraint (= (f "+2 455-126-377") "2.455.126.377"))

(constraint (= (f "+2 455-126-377") "2.455.126.377"))

(constraint (= (f "+2 455-126-377") "2.455.126.377"))

(constraint (= (f "+196 728-585-376") "196.728.585.376"))

(constraint (= (f "+196 728-585-376") "196.728.585.376"))

(constraint (= (f "+196 728-585-376") "196.728.585.376"))

(constraint (= (f "+33 117-430-125") "33.117.430.125"))

(constraint (= (f "+33 117-430-125") "33.117.430.125"))

(constraint (= (f "+33 117-430-125") "33.117.430.125"))

(constraint (= (f "+195 488-831-768") "195.488.831.768"))

(constraint (= (f "+195 488-831-768") "195.488.831.768"))

(constraint (= (f "+195 488-831-768") "195.488.831.768"))

(constraint (= (f "+86 468-718-108") "86.468.718.108"))

(constraint (= (f "+86 468-718-108") "86.468.718.108"))

(constraint (= (f "+86 468-718-108") "86.468.718.108"))

(constraint (= (f "+194 278-716-950") "194.278.716.950"))

(constraint (= (f "+194 278-716-950") "194.278.716.950"))

(constraint (= (f "+194 278-716-950") "194.278.716.950"))

(constraint (= (f "+43 730-685-847") "43.730.685.847"))

(constraint (= (f "+43 730-685-847") "43.730.685.847"))

(constraint (= (f "+43 730-685-847") "43.730.685.847"))

(constraint (= (f "+140 794-289-551") "140.794.289.551"))

(constraint (= (f "+140 794-289-551") "140.794.289.551"))

(constraint (= (f "+140 794-289-551") "140.794.289.551"))

(constraint (= (f "+21 679-740-834") "21.679.740.834"))

(constraint (= (f "+21 679-740-834") "21.679.740.834"))

(constraint (= (f "+21 679-740-834") "21.679.740.834"))

(constraint (= (f "+98 717-997-323") "98.717.997.323"))

(constraint (= (f "+98 717-997-323") "98.717.997.323"))

(constraint (= (f "+98 717-997-323") "98.717.997.323"))

(constraint (= (f "+47 401-100-231") "47.401.100.231"))

(constraint (= (f "+47 401-100-231") "47.401.100.231"))

(constraint (= (f "+47 401-100-231") "47.401.100.231"))

(constraint (= (f "+143 726-462-368") "143.726.462.368"))

(constraint (= (f "+143 726-462-368") "143.726.462.368"))

(constraint (= (f "+143 726-462-368") "143.726.462.368"))

(constraint (= (f "+147 864-005-968") "147.864.005.968"))

(constraint (= (f "+147 864-005-968") "147.864.005.968"))

(constraint (= (f "+147 864-005-968") "147.864.005.968"))

(constraint (= (f "+130 590-757-665") "130.590.757.665"))

(constraint (= (f "+130 590-757-665") "130.590.757.665"))

(constraint (= (f "+130 590-757-665") "130.590.757.665"))

(constraint (= (f "+197 700-858-976") "197.700.858.976"))

(constraint (= (f "+197 700-858-976") "197.700.858.976"))

(constraint (= (f "+197 700-858-976") "197.700.858.976"))

(constraint (= (f "+158 344-541-946") "158.344.541.946"))

(constraint (= (f "+158 344-541-946") "158.344.541.946"))

(constraint (= (f "+158 344-541-946") "158.344.541.946"))

(constraint (= (f "+56 242-901-234") "56.242.901.234"))

(constraint (= (f "+56 242-901-234") "56.242.901.234"))

(constraint (= (f "+56 242-901-234") "56.242.901.234"))

(constraint (= (f "+132 313-075-754") "132.313.075.754"))

(constraint (= (f "+132 313-075-754") "132.313.075.754"))

(constraint (= (f "+132 313-075-754") "132.313.075.754"))

(constraint (= (f "+130 517-953-149") "130.517.953.149"))

(constraint (= (f "+130 517-953-149") "130.517.953.149"))

(constraint (= (f "+130 517-953-149") "130.517.953.149"))

(constraint (= (f "+158 684-878-743") "158.684.878.743"))

(constraint (= (f "+158 684-878-743") "158.684.878.743"))

(constraint (= (f "+158 684-878-743") "158.684.878.743"))

(constraint (= (f "+52 836-582-035") "52.836.582.035"))

(constraint (= (f "+52 836-582-035") "52.836.582.035"))

(constraint (= (f "+52 836-582-035") "52.836.582.035"))

(constraint (= (f "+138 117-484-671") "138.117.484.671"))

(constraint (= (f "+138 117-484-671") "138.117.484.671"))

(constraint (= (f "+138 117-484-671") "138.117.484.671"))

(constraint (= (f "+50 012-148-873") "50.012.148.873"))

(constraint (= (f "+50 012-148-873") "50.012.148.873"))

(constraint (= (f "+50 012-148-873") "50.012.148.873"))

(constraint (= (f "+105 048-919-483") "105.048.919.483"))

(constraint (= (f "+105 048-919-483") "105.048.919.483"))

(constraint (= (f "+105 048-919-483") "105.048.919.483"))

(constraint (= (f "+18 209-851-997") "18.209.851.997"))

(constraint (= (f "+18 209-851-997") "18.209.851.997"))

(constraint (= (f "+18 209-851-997") "18.209.851.997"))

(constraint (= (f "+176 938-056-084") "176.938.056.084"))

(constraint (= (f "+176 938-056-084") "176.938.056.084"))

(constraint (= (f "+176 938-056-084") "176.938.056.084"))

(constraint (= (f "+141 018-132-973") "141.018.132.973"))

(constraint (= (f "+141 018-132-973") "141.018.132.973"))

(constraint (= (f "+141 018-132-973") "141.018.132.973"))

(constraint (= (f "+199 936-162-415") "199.936.162.415"))

(constraint (= (f "+199 936-162-415") "199.936.162.415"))

(constraint (= (f "+199 936-162-415") "199.936.162.415"))

(constraint (= (f "+33 547-051-264") "33.547.051.264"))

(constraint (= (f "+33 547-051-264") "33.547.051.264"))

(constraint (= (f "+33 547-051-264") "33.547.051.264"))

(constraint (= (f "+161 233-981-513") "161.233.981.513"))

(constraint (= (f "+161 233-981-513") "161.233.981.513"))

(constraint (= (f "+161 233-981-513") "161.233.981.513"))

(constraint (= (f "+115 101-728-328") "115.101.728.328"))

(constraint (= (f "+115 101-728-328") "115.101.728.328"))

(constraint (= (f "+115 101-728-328") "115.101.728.328"))

(constraint (= (f "+45 095-746-635") "45.095.746.635"))

(constraint (= (f "+45 095-746-635") "45.095.746.635"))

(constraint (= (f "+45 095-746-635") "45.095.746.635"))

(constraint (= (f "+106 769-858-438") "106.769.858.438"))

(constraint (= (f "+83 973-757-831") "83.973.757.831"))

(constraint (= (f "+62 647-787-775") "62.647.787.775"))

(constraint (= (f "+172 027-507-632") "172.027.507.632"))

(constraint (= (f "+72 001-050-856") "72.001.050.856"))

(constraint (= (f "+95 310-537-401") "95.310.537.401"))

(constraint (= (f "+6 775-969-238") "6.775.969.238"))

(constraint (= (f "+174 594-539-946") "174.594.539.946"))

(constraint (= (f "+155 927-275-860") "155.927.275.860"))

(constraint (= (f "+167 405-461-331") "167.405.461.331"))

(constraint (= (f "+10 538-347-401") "10.538.347.401"))

(constraint (= (f "+60 971-986-103") "60.971.986.103"))

(constraint (= (f "+13 258-276-941") "13.258.276.941"))

(constraint (= (f "+2 604-746-137") "2.604.746.137"))

(constraint (= (f "+25 998-898-180") "25.998.898.180"))

(constraint (= (f "+151 862-946-541") "151.862.946.541"))

(constraint (= (f "+118 165-041-038") "118.165.041.038"))

(constraint (= (f "+144 170-592-272") "144.170.592.272"))

(constraint (= (f "+94 462-008-482") "94.462.008.482"))

(constraint (= (f "+82 685-122-086") "82.685.122.086"))

(constraint (= (f "+82 675-366-472") "82.675.366.472"))

(constraint (= (f "+80 066-433-096") "80.066.433.096"))

(constraint (= (f "+163 039-436-166") "163.039.436.166"))

(constraint (= (f "+138 808-083-074") "138.808.083.074"))

(constraint (= (f "+42 643-245-738") "42.643.245.738"))

(constraint (= (f "+169 822-542-726") "169.822.542.726"))

(constraint (= (f "+176 767-782-369") "176.767.782.369"))

(constraint (= (f "+47 414-369-343") "47.414.369.343"))

(constraint (= (f "+138 885-618-512") "138.885.618.512"))

(constraint (= (f "+104 158-671-355") "104.158.671.355"))

(constraint (= (f "+188 280-087-526") "188.280.087.526"))

(constraint (= (f "+50 268-571-336") "50.268.571.336"))

(constraint (= (f "+183 225-960-024") "183.225.960.024"))

(constraint (= (f "+58 191-982-491") "58.191.982.491"))

(constraint (= (f "+9 507-092-535") "9.507.092.535"))

(constraint (= (f "+64 061-601-398") "64.061.601.398"))

(constraint (= (f "+189 831-591-877") "189.831.591.877"))

(constraint (= (f "+129 425-765-844") "129.425.765.844"))

(constraint (= (f "+94 856-734-046") "94.856.734.046"))

(constraint (= (f "+35 082-845-261") "35.082.845.261"))

(constraint (= (f "+185 394-622-272") "185.394.622.272"))

(constraint (= (f "+163 905-707-740") "163.905.707.740"))

(constraint (= (f "+23 448-213-807") "23.448.213.807"))

(constraint (= (f "+42 634-077-089") "42.634.077.089"))

(constraint (= (f "+18 051-287-382") "18.051.287.382"))

(constraint (= (f "+29 773-545-520") "29.773.545.520"))

(constraint (= (f "+43 249-097-743") "43.249.097.743"))

(constraint (= (f "+158 674-736-891") "158.674.736.891"))

(constraint (= (f "+45 124-771-454") "45.124.771.454"))

(constraint (= (f "+180 029-457-654") "180.029.457.654"))

(constraint (= (f "+75 227-250-652") "75.227.250.652"))

(constraint (= (f "+5 528-317-854") "5.528.317.854"))

(constraint (= (f "+81 849-629-290") "81.849.629.290"))

(constraint (= (f "+46 005-119-176") "46.005.119.176"))

(constraint (= (f "+108 150-380-705") "108.150.380.705"))

(constraint (= (f "+40 122-224-247") "40.122.224.247"))

(constraint (= (f "+68 890-680-027") "68.890.680.027"))

(constraint (= (f "+169 060-204-504") "169.060.204.504"))

(constraint (= (f "+95 620-820-945") "95.620.820.945"))

(constraint (= (f "+43 592-938-846") "43.592.938.846"))

(constraint (= (f "+7 023-296-647") "7.023.296.647"))

(constraint (= (f "+20 541-401-396") "20.541.401.396"))

(constraint (= (f "+64 751-365-934") "64.751.365.934"))

(constraint (= (f "+163 546-119-476") "163.546.119.476"))

(constraint (= (f "+198 557-666-779") "198.557.666.779"))

(constraint (= (f "+14 673-759-017") "14.673.759.017"))

(constraint (= (f "+161 086-020-168") "161.086.020.168"))

(constraint (= (f "+65 970-575-488") "65.970.575.488"))

(constraint (= (f "+2 455-126-377") "2.455.126.377"))

(constraint (= (f "+196 728-585-376") "196.728.585.376"))

(constraint (= (f "+33 117-430-125") "33.117.430.125"))

(constraint (= (f "+195 488-831-768") "195.488.831.768"))

(constraint (= (f "+86 468-718-108") "86.468.718.108"))

(constraint (= (f "+194 278-716-950") "194.278.716.950"))

(constraint (= (f "+43 730-685-847") "43.730.685.847"))

(constraint (= (f "+140 794-289-551") "140.794.289.551"))

(constraint (= (f "+21 679-740-834") "21.679.740.834"))

(constraint (= (f "+98 717-997-323") "98.717.997.323"))

(constraint (= (f "+47 401-100-231") "47.401.100.231"))

(constraint (= (f "+143 726-462-368") "143.726.462.368"))

(constraint (= (f "+147 864-005-968") "147.864.005.968"))

(constraint (= (f "+130 590-757-665") "130.590.757.665"))

(constraint (= (f "+197 700-858-976") "197.700.858.976"))

(constraint (= (f "+158 344-541-946") "158.344.541.946"))

(constraint (= (f "+56 242-901-234") "56.242.901.234"))

(constraint (= (f "+132 313-075-754") "132.313.075.754"))

(constraint (= (f "+130 517-953-149") "130.517.953.149"))

(constraint (= (f "+158 684-878-743") "158.684.878.743"))

(constraint (= (f "+52 836-582-035") "52.836.582.035"))

(constraint (= (f "+138 117-484-671") "138.117.484.671"))

(constraint (= (f "+50 012-148-873") "50.012.148.873"))

(constraint (= (f "+105 048-919-483") "105.048.919.483"))

(constraint (= (f "+18 209-851-997") "18.209.851.997"))

(constraint (= (f "+176 938-056-084") "176.938.056.084"))

(constraint (= (f "+141 018-132-973") "141.018.132.973"))

(constraint (= (f "+199 936-162-415") "199.936.162.415"))

(constraint (= (f "+33 547-051-264") "33.547.051.264"))

(constraint (= (f "+161 233-981-513") "161.233.981.513"))

(constraint (= (f "+115 101-728-328") "115.101.728.328"))

(constraint (= (f "+45 095-746-635") "45.095.746.635"))


(check-synth)
