# Supplementary material
Source: ML conference proceedings conference paper supplement (https://proceedings.neurips.cc/paper_files/paper/2022/hash/0113ef4642264adc2e6924a3cbbdf532-Abstract.html)
Supplement: Supplementary file 1 [file 0113ef4642264adc2e6924a3cbbdf532-Supplemental-Conference.zip › neurips_supplementary_cameraready/ec-master/PBE_Strings_Track/phone-10-long-repeat.sl]

(set-logic SLIA)

 

(synth-fun f ((name String)) String

    ((Start String (ntString))

     (ntString String (name " " "+" "-" "." "(" ")"

                       (str.++ ntString ntString)

                       (str.replace ntString ntString ntString)

                       (str.at ntString ntInt)

                       (int.to.str ntInt)

                       (str.substr ntString ntInt ntInt)))

      (ntInt Int (0 1 2 3 4 5

                  (+ ntInt ntInt)

                  (- ntInt ntInt)

                  (str.len ntString)

                  (str.to.int ntString)

                  (str.indexof ntString ntString ntInt)))

      (ntBool Bool (true false

                    (str.prefixof ntString ntString)

                    (str.suffixof ntString ntString)

                    (str.contains ntString ntString)))))


(declare-var name String)


(constraint (= (f "+106 769-858-438") "+106 (769) 858-438"))

(constraint (= (f "+106 769-858-438") "+106 (769) 858-438"))

(constraint (= (f "+106 769-858-438") "+106 (769) 858-438"))

(constraint (= (f "+83 973-757-831") "+83 (973) 757-831"))

(constraint (= (f "+83 973-757-831") "+83 (973) 757-831"))

(constraint (= (f "+83 973-757-831") "+83 (973) 757-831"))

(constraint (= (f "+62 647-787-775") "+62 (647) 787-775"))

(constraint (= (f "+62 647-787-775") "+62 (647) 787-775"))

(constraint (= (f "+62 647-787-775") "+62 (647) 787-775"))

(constraint (= (f "+172 027-507-632") "+172 (027) 507-632"))

(constraint (= (f "+172 027-507-632") "+172 (027) 507-632"))

(constraint (= (f "+172 027-507-632") "+172 (027) 507-632"))

(constraint (= (f "+72 001-050-856") "+72 (001) 050-856"))

(constraint (= (f "+72 001-050-856") "+72 (001) 050-856"))

(constraint (= (f "+72 001-050-856") "+72 (001) 050-856"))

(constraint (= (f "+95 310-537-401") "+95 (310) 537-401"))

(constraint (= (f "+95 310-537-401") "+95 (310) 537-401"))

(constraint (= (f "+95 310-537-401") "+95 (310) 537-401"))

(constraint (= (f "+6 775-969-238") "+6 (775) 969-238"))

(constraint (= (f "+6 775-969-238") "+6 (775) 969-238"))

(constraint (= (f "+6 775-969-238") "+6 (775) 969-238"))

(constraint (= (f "+174 594-539-946") "+174 (594) 539-946"))

(constraint (= (f "+174 594-539-946") "+174 (594) 539-946"))

(constraint (= (f "+174 594-539-946") "+174 (594) 539-946"))

(constraint (= (f "+155 927-275-860") "+155 (927) 275-860"))

(constraint (= (f "+155 927-275-860") "+155 (927) 275-860"))

(constraint (= (f "+155 927-275-860") "+155 (927) 275-860"))

(constraint (= (f "+167 405-461-331") "+167 (405) 461-331"))

(constraint (= (f "+167 405-461-331") "+167 (405) 461-331"))

(constraint (= (f "+167 405-461-331") "+167 (405) 461-331"))

(constraint (= (f "+10 538-347-401") "+10 (538) 347-401"))

(constraint (= (f "+10 538-347-401") "+10 (538) 347-401"))

(constraint (= (f "+10 538-347-401") "+10 (538) 347-401"))

(constraint (= (f "+60 971-986-103") "+60 (971) 986-103"))

(constraint (= (f "+60 971-986-103") "+60 (971) 986-103"))

(constraint (= (f "+60 971-986-103") "+60 (971) 986-103"))

(constraint (= (f "+13 258-276-941") "+13 (258) 276-941"))

(constraint (= (f "+13 258-276-941") "+13 (258) 276-941"))

(constraint (= (f "+13 258-276-941") "+13 (258) 276-941"))

(constraint (= (f "+2 604-746-137") "+2 (604) 746-137"))

(constraint (= (f "+2 604-746-137") "+2 (604) 746-137"))

(constraint (= (f "+2 604-746-137") "+2 (604) 746-137"))

(constraint (= (f "+25 998-898-180") "+25 (998) 898-180"))

(constraint (= (f "+25 998-898-180") "+25 (998) 898-180"))

(constraint (= (f "+25 998-898-180") "+25 (998) 898-180"))

(constraint (= (f "+151 862-946-541") "+151 (862) 946-541"))

(constraint (= (f "+151 862-946-541") "+151 (862) 946-541"))

(constraint (= (f "+151 862-946-541") "+151 (862) 946-541"))

(constraint (= (f "+118 165-041-038") "+118 (165) 041-038"))

(constraint (= (f "+118 165-041-038") "+118 (165) 041-038"))

(constraint (= (f "+118 165-041-038") "+118 (165) 041-038"))

(constraint (= (f "+144 170-592-272") "+144 (170) 592-272"))

(constraint (= (f "+144 170-592-272") "+144 (170) 592-272"))

(constraint (= (f "+144 170-592-272") "+144 (170) 592-272"))

(constraint (= (f "+94 462-008-482") "+94 (462) 008-482"))

(constraint (= (f "+94 462-008-482") "+94 (462) 008-482"))

(constraint (= (f "+94 462-008-482") "+94 (462) 008-482"))

(constraint (= (f "+82 685-122-086") "+82 (685) 122-086"))

(constraint (= (f "+82 685-122-086") "+82 (685) 122-086"))

(constraint (= (f "+82 685-122-086") "+82 (685) 122-086"))

(constraint (= (f "+82 675-366-472") "+82 (675) 366-472"))

(constraint (= (f "+82 675-366-472") "+82 (675) 366-472"))

(constraint (= (f "+82 675-366-472") "+82 (675) 366-472"))

(constraint (= (f "+80 066-433-096") "+80 (066) 433-096"))

(constraint (= (f "+80 066-433-096") "+80 (066) 433-096"))

(constraint (= (f "+80 066-433-096") "+80 (066) 433-096"))

(constraint (= (f "+163 039-436-166") "+163 (039) 436-166"))

(constraint (= (f "+163 039-436-166") "+163 (039) 436-166"))

(constraint (= (f "+163 039-436-166") "+163 (039) 436-166"))

(constraint (= (f "+138 808-083-074") "+138 (808) 083-074"))

(constraint (= (f "+138 808-083-074") "+138 (808) 083-074"))

(constraint (= (f "+138 808-083-074") "+138 (808) 083-074"))

(constraint (= (f "+42 643-245-738") "+42 (643) 245-738"))

(constraint (= (f "+42 643-245-738") "+42 (643) 245-738"))

(constraint (= (f "+42 643-245-738") "+42 (643) 245-738"))

(constraint (= (f "+169 822-542-726") "+169 (822) 542-726"))

(constraint (= (f "+169 822-542-726") "+169 (822) 542-726"))

(constraint (= (f "+169 822-542-726") "+169 (822) 542-726"))

(constraint (= (f "+176 767-782-369") "+176 (767) 782-369"))

(constraint (= (f "+176 767-782-369") "+176 (767) 782-369"))

(constraint (= (f "+176 767-782-369") "+176 (767) 782-369"))

(constraint (= (f "+47 414-369-343") "+47 (414) 369-343"))

(constraint (= (f "+47 414-369-343") "+47 (414) 369-343"))

(constraint (= (f "+47 414-369-343") "+47 (414) 369-343"))

(constraint (= (f "+138 885-618-512") "+138 (885) 618-512"))

(constraint (= (f "+138 885-618-512") "+138 (885) 618-512"))

(constraint (= (f "+138 885-618-512") "+138 (885) 618-512"))

(constraint (= (f "+104 158-671-355") "+104 (158) 671-355"))

(constraint (= (f "+104 158-671-355") "+104 (158) 671-355"))

(constraint (= (f "+104 158-671-355") "+104 (158) 671-355"))

(constraint (= (f "+188 280-087-526") "+188 (280) 087-526"))

(constraint (= (f "+188 280-087-526") "+188 (280) 087-526"))

(constraint (= (f "+188 280-087-526") "+188 (280) 087-526"))

(constraint (= (f "+50 268-571-336") "+50 (268) 571-336"))

(constraint (= (f "+50 268-571-336") "+50 (268) 571-336"))

(constraint (= (f "+50 268-571-336") "+50 (268) 571-336"))

(constraint (= (f "+183 225-960-024") "+183 (225) 960-024"))

(constraint (= (f "+183 225-960-024") "+183 (225) 960-024"))

(constraint (= (f "+183 225-960-024") "+183 (225) 960-024"))

(constraint (= (f "+58 191-982-491") "+58 (191) 982-491"))

(constraint (= (f "+58 191-982-491") "+58 (191) 982-491"))

(constraint (= (f "+58 191-982-491") "+58 (191) 982-491"))

(constraint (= (f "+9 507-092-535") "+9 (507) 092-535"))

(constraint (= (f "+9 507-092-535") "+9 (507) 092-535"))

(constraint (= (f "+9 507-092-535") "+9 (507) 092-535"))

(constraint (= (f "+64 061-601-398") "+64 (061) 601-398"))

(constraint (= (f "+64 061-601-398") "+64 (061) 601-398"))

(constraint (= (f "+64 061-601-398") "+64 (061) 601-398"))

(constraint (= (f "+189 831-591-877") "+189 (831) 591-877"))

(constraint (= (f "+189 831-591-877") "+189 (831) 591-877"))

(constraint (= (f "+189 831-591-877") "+189 (831) 591-877"))

(constraint (= (f "+129 425-765-844") "+129 (425) 765-844"))

(constraint (= (f "+129 425-765-844") "+129 (425) 765-844"))

(constraint (= (f "+129 425-765-844") "+129 (425) 765-844"))

(constraint (= (f "+94 856-734-046") "+94 (856) 734-046"))

(constraint (= (f "+94 856-734-046") "+94 (856) 734-046"))

(constraint (= (f "+94 856-734-046") "+94 (856) 734-046"))

(constraint (= (f "+35 082-845-261") "+35 (082) 845-261"))

(constraint (= (f "+35 082-845-261") "+35 (082) 845-261"))

(constraint (= (f "+35 082-845-261") "+35 (082) 845-261"))

(constraint (= (f "+185 394-622-272") "+185 (394) 622-272"))

(constraint (= (f "+185 394-622-272") "+185 (394) 622-272"))

(constraint (= (f "+185 394-622-272") "+185 (394) 622-272"))

(constraint (= (f "+163 905-707-740") "+163 (905) 707-740"))

(constraint (= (f "+163 905-707-740") "+163 (905) 707-740"))

(constraint (= (f "+163 905-707-740") "+163 (905) 707-740"))

(constraint (= (f "+23 448-213-807") "+23 (448) 213-807"))

(constraint (= (f "+23 448-213-807") "+23 (448) 213-807"))

(constraint (= (f "+23 448-213-807") "+23 (448) 213-807"))

(constraint (= (f "+42 634-077-089") "+42 (634) 077-089"))

(constraint (= (f "+42 634-077-089") "+42 (634) 077-089"))

(constraint (= (f "+42 634-077-089") "+42 (634) 077-089"))

(constraint (= (f "+18 051-287-382") "+18 (051) 287-382"))

(constraint (= (f "+18 051-287-382") "+18 (051) 287-382"))

(constraint (= (f "+18 051-287-382") "+18 (051) 287-382"))

(constraint (= (f "+29 773-545-520") "+29 (773) 545-520"))

(constraint (= (f "+29 773-545-520") "+29 (773) 545-520"))

(constraint (= (f "+29 773-545-520") "+29 (773) 545-520"))

(constraint (= (f "+43 249-097-743") "+43 (249) 097-743"))

(constraint (= (f "+43 249-097-743") "+43 (249) 097-743"))

(constraint (= (f "+43 249-097-743") "+43 (249) 097-743"))

(constraint (= (f "+158 674-736-891") "+158 (674) 736-891"))

(constraint (= (f "+158 674-736-891") "+158 (674) 736-891"))

(constraint (= (f "+158 674-736-891") "+158 (674) 736-891"))

(constraint (= (f "+45 124-771-454") "+45 (124) 771-454"))

(constraint (= (f "+45 124-771-454") "+45 (124) 771-454"))

(constraint (= (f "+45 124-771-454") "+45 (124) 771-454"))

(constraint (= (f "+180 029-457-654") "+180 (029) 457-654"))

(constraint (= (f "+180 029-457-654") "+180 (029) 457-654"))

(constraint (= (f "+180 029-457-654") "+180 (029) 457-654"))

(constraint (= (f "+75 227-250-652") "+75 (227) 250-652"))

(constraint (= (f "+75 227-250-652") "+75 (227) 250-652"))

(constraint (= (f "+75 227-250-652") "+75 (227) 250-652"))

(constraint (= (f "+5 528-317-854") "+5 (528) 317-854"))

(constraint (= (f "+5 528-317-854") "+5 (528) 317-854"))

(constraint (= (f "+5 528-317-854") "+5 (528) 317-854"))

(constraint (= (f "+81 849-629-290") "+81 (849) 629-290"))

(constraint (= (f "+81 849-629-290") "+81 (849) 629-290"))

(constraint (= (f "+81 849-629-290") "+81 (849) 629-290"))

(constraint (= (f "+46 005-119-176") "+46 (005) 119-176"))

(constraint (= (f "+46 005-119-176") "+46 (005) 119-176"))

(constraint (= (f "+46 005-119-176") "+46 (005) 119-176"))

(constraint (= (f "+108 150-380-705") "+108 (150) 380-705"))

(constraint (= (f "+108 150-380-705") "+108 (150) 380-705"))

(constraint (= (f "+108 150-380-705") "+108 (150) 380-705"))

(constraint (= (f "+40 122-224-247") "+40 (122) 224-247"))

(constraint (= (f "+40 122-224-247") "+40 (122) 224-247"))

(constraint (= (f "+40 122-224-247") "+40 (122) 224-247"))

(constraint (= (f "+68 890-680-027") "+68 (890) 680-027"))

(constraint (= (f "+68 890-680-027") "+68 (890) 680-027"))

(constraint (= (f "+68 890-680-027") "+68 (890) 680-027"))

(constraint (= (f "+169 060-204-504") "+169 (060) 204-504"))

(constraint (= (f "+169 060-204-504") "+169 (060) 204-504"))

(constraint (= (f "+169 060-204-504") "+169 (060) 204-504"))

(constraint (= (f "+95 620-820-945") "+95 (620) 820-945"))

(constraint (= (f "+95 620-820-945") "+95 (620) 820-945"))

(constraint (= (f "+95 620-820-945") "+95 (620) 820-945"))

(constraint (= (f "+43 592-938-846") "+43 (592) 938-846"))

(constraint (= (f "+43 592-938-846") "+43 (592) 938-846"))

(constraint (= (f "+43 592-938-846") "+43 (592) 938-846"))

(constraint (= (f "+7 023-296-647") "+7 (023) 296-647"))

(constraint (= (f "+7 023-296-647") "+7 (023) 296-647"))

(constraint (= (f "+7 023-296-647") "+7 (023) 296-647"))

(constraint (= (f "+20 541-401-396") "+20 (541) 401-396"))

(constraint (= (f "+20 541-401-396") "+20 (541) 401-396"))

(constraint (= (f "+20 541-401-396") "+20 (541) 401-396"))

(constraint (= (f "+64 751-365-934") "+64 (751) 365-934"))

(constraint (= (f "+64 751-365-934") "+64 (751) 365-934"))

(constraint (= (f "+64 751-365-934") "+64 (751) 365-934"))

(constraint (= (f "+163 546-119-476") "+163 (546) 119-476"))

(constraint (= (f "+163 546-119-476") "+163 (546) 119-476"))

(constraint (= (f "+163 546-119-476") "+163 (546) 119-476"))

(constraint (= (f "+198 557-666-779") "+198 (557) 666-779"))

(constraint (= (f "+198 557-666-779") "+198 (557) 666-779"))

(constraint (= (f "+198 557-666-779") "+198 (557) 666-779"))

(constraint (= (f "+14 673-759-017") "+14 (673) 759-017"))

(constraint (= (f "+14 673-759-017") "+14 (673) 759-017"))

(constraint (= (f "+14 673-759-017") "+14 (673) 759-017"))

(constraint (= (f "+161 086-020-168") "+161 (086) 020-168"))

(constraint (= (f "+161 086-020-168") "+161 (086) 020-168"))

(constraint (= (f "+161 086-020-168") "+161 (086) 020-168"))

(constraint (= (f "+65 970-575-488") "+65 (970) 575-488"))

(constraint (= (f "+65 970-575-488") "+65 (970) 575-488"))

(constraint (= (f "+65 970-575-488") "+65 (970) 575-488"))

(constraint (= (f "+2 455-126-377") "+2 (455) 126-377"))

(constraint (= (f "+2 455-126-377") "+2 (455) 126-377"))

(constraint (= (f "+2 455-126-377") "+2 (455) 126-377"))

(constraint (= (f "+196 728-585-376") "+196 (728) 585-376"))

(constraint (= (f "+196 728-585-376") "+196 (728) 585-376"))

(constraint (= (f "+196 728-585-376") "+196 (728) 585-376"))

(constraint (= (f "+33 117-430-125") "+33 (117) 430-125"))

(constraint (= (f "+33 117-430-125") "+33 (117) 430-125"))

(constraint (= (f "+33 117-430-125") "+33 (117) 430-125"))

(constraint (= (f "+195 488-831-768") "+195 (488) 831-768"))

(constraint (= (f "+195 488-831-768") "+195 (488) 831-768"))

(constraint (= (f "+195 488-831-768") "+195 (488) 831-768"))

(constraint (= (f "+86 468-718-108") "+86 (468) 718-108"))

(constraint (= (f "+86 468-718-108") "+86 (468) 718-108"))

(constraint (= (f "+86 468-718-108") "+86 (468) 718-108"))

(constraint (= (f "+194 278-716-950") "+194 (278) 716-950"))

(constraint (= (f "+194 278-716-950") "+194 (278) 716-950"))

(constraint (= (f "+194 278-716-950") "+194 (278) 716-950"))

(constraint (= (f "+43 730-685-847") "+43 (730) 685-847"))

(constraint (= (f "+43 730-685-847") "+43 (730) 685-847"))

(constraint (= (f "+43 730-685-847") "+43 (730) 685-847"))

(constraint (= (f "+140 794-289-551") "+140 (794) 289-551"))

(constraint (= (f "+140 794-289-551") "+140 (794) 289-551"))

(constraint (= (f "+140 794-289-551") "+140 (794) 289-551"))

(constraint (= (f "+21 679-740-834") "+21 (679) 740-834"))

(constraint (= (f "+21 679-740-834") "+21 (679) 740-834"))

(constraint (= (f "+21 679-740-834") "+21 (679) 740-834"))

(constraint (= (f "+98 717-997-323") "+98 (717) 997-323"))

(constraint (= (f "+98 717-997-323") "+98 (717) 997-323"))

(constraint (= (f "+98 717-997-323") "+98 (717) 997-323"))

(constraint (= (f "+47 401-100-231") "+47 (401) 100-231"))

(constraint (= (f "+47 401-100-231") "+47 (401) 100-231"))

(constraint (= (f "+47 401-100-231") "+47 (401) 100-231"))

(constraint (= (f "+143 726-462-368") "+143 (726) 462-368"))

(constraint (= (f "+143 726-462-368") "+143 (726) 462-368"))

(constraint (= (f "+143 726-462-368") "+143 (726) 462-368"))

(constraint (= (f "+147 864-005-968") "+147 (864) 005-968"))

(constraint (= (f "+147 864-005-968") "+147 (864) 005-968"))

(constraint (= (f "+147 864-005-968") "+147 (864) 005-968"))

(constraint (= (f "+130 590-757-665") "+130 (590) 757-665"))

(constraint (= (f "+130 590-757-665") "+130 (590) 757-665"))

(constraint (= (f "+130 590-757-665") "+130 (590) 757-665"))

(constraint (= (f "+197 700-858-976") "+197 (700) 858-976"))

(constraint (= (f "+197 700-858-976") "+197 (700) 858-976"))

(constraint (= (f "+197 700-858-976") "+197 (700) 858-976"))

(constraint (= (f "+158 344-541-946") "+158 (344) 541-946"))

(constraint (= (f "+158 344-541-946") "+158 (344) 541-946"))

(constraint (= (f "+158 344-541-946") "+158 (344) 541-946"))

(constraint (= (f "+56 242-901-234") "+56 (242) 901-234"))

(constraint (= (f "+56 242-901-234") "+56 (242) 901-234"))

(constraint (= (f "+56 242-901-234") "+56 (242) 901-234"))

(constraint (= (f "+132 313-075-754") "+132 (313) 075-754"))

(constraint (= (f "+132 313-075-754") "+132 (313) 075-754"))

(constraint (= (f "+132 313-075-754") "+132 (313) 075-754"))

(constraint (= (f "+130 517-953-149") "+130 (517) 953-149"))

(constraint (= (f "+130 517-953-149") "+130 (517) 953-149"))

(constraint (= (f "+130 517-953-149") "+130 (517) 953-149"))

(constraint (= (f "+158 684-878-743") "+158 (684) 878-743"))

(constraint (= (f "+158 684-878-743") "+158 (684) 878-743"))

(constraint (= (f "+158 684-878-743") "+158 (684) 878-743"))

(constraint (= (f "+52 836-582-035") "+52 (836) 582-035"))

(constraint (= (f "+52 836-582-035") "+52 (836) 582-035"))

(constraint (= (f "+52 836-582-035") "+52 (836) 582-035"))

(constraint (= (f "+138 117-484-671") "+138 (117) 484-671"))

(constraint (= (f "+138 117-484-671") "+138 (117) 484-671"))

(constraint (= (f "+138 117-484-671") "+138 (117) 484-671"))

(constraint (= (f "+50 012-148-873") "+50 (012) 148-873"))

(constraint (= (f "+50 012-148-873") "+50 (012) 148-873"))

(constraint (= (f "+50 012-148-873") "+50 (012) 148-873"))

(constraint (= (f "+105 048-919-483") "+105 (048) 919-483"))

(constraint (= (f "+105 048-919-483") "+105 (048) 919-483"))

(constraint (= (f "+105 048-919-483") "+105 (048) 919-483"))

(constraint (= (f "+18 209-851-997") "+18 (209) 851-997"))

(constraint (= (f "+18 209-851-997") "+18 (209) 851-997"))

(constraint (= (f "+18 209-851-997") "+18 (209) 851-997"))

(constraint (= (f "+176 938-056-084") "+176 (938) 056-084"))

(constraint (= (f "+176 938-056-084") "+176 (938) 056-084"))

(constraint (= (f "+176 938-056-084") "+176 (938) 056-084"))

(constraint (= (f "+141 018-132-973") "+141 (018) 132-973"))

(constraint (= (f "+141 018-132-973") "+141 (018) 132-973"))

(constraint (= (f "+141 018-132-973") "+141 (018) 132-973"))

(constraint (= (f "+199 936-162-415") "+199 (936) 162-415"))

(constraint (= (f "+199 936-162-415") "+199 (936) 162-415"))

(constraint (= (f "+199 936-162-415") "+199 (936) 162-415"))

(constraint (= (f "+33 547-051-264") "+33 (547) 051-264"))

(constraint (= (f "+33 547-051-264") "+33 (547) 051-264"))

(constraint (= (f "+33 547-051-264") "+33 (547) 051-264"))

(constraint (= (f "+161 233-981-513") "+161 (233) 981-513"))

(constraint (= (f "+161 233-981-513") "+161 (233) 981-513"))

(constraint (= (f "+161 233-981-513") "+161 (233) 981-513"))

(constraint (= (f "+115 101-728-328") "+115 (101) 728-328"))

(constraint (= (f "+115 101-728-328") "+115 (101) 728-328"))

(constraint (= (f "+115 101-728-328") "+115 (101) 728-328"))

(constraint (= (f "+45 095-746-635") "+45 (095) 746-635"))

(constraint (= (f "+45 095-746-635") "+45 (095) 746-635"))

(constraint (= (f "+45 095-746-635") "+45 (095) 746-635"))

(constraint (= (f "+106 769-858-438") "+106 (769) 858-438"))

(constraint (= (f "+83 973-757-831") "+83 (973) 757-831"))

(constraint (= (f "+62 647-787-775") "+62 (647) 787-775"))

(constraint (= (f "+172 027-507-632") "+172 (027) 507-632"))

(constraint (= (f "+72 001-050-856") "+72 (001) 050-856"))

(constraint (= (f "+95 310-537-401") "+95 (310) 537-401"))

(constraint (= (f "+6 775-969-238") "+6 (775) 969-238"))

(constraint (= (f "+174 594-539-946") "+174 (594) 539-946"))

(constraint (= (f "+155 927-275-860") "+155 (927) 275-860"))

(constraint (= (f "+167 405-461-331") "+167 (405) 461-331"))

(constraint (= (f "+10 538-347-401") "+10 (538) 347-401"))

(constraint (= (f "+60 971-986-103") "+60 (971) 986-103"))

(constraint (= (f "+13 258-276-941") "+13 (258) 276-941"))

(constraint (= (f "+2 604-746-137") "+2 (604) 746-137"))

(constraint (= (f "+25 998-898-180") "+25 (998) 898-180"))

(constraint (= (f "+151 862-946-541") "+151 (862) 946-541"))

(constraint (= (f "+118 165-041-038") "+118 (165) 041-038"))

(constraint (= (f "+144 170-592-272") "+144 (170) 592-272"))

(constraint (= (f "+94 462-008-482") "+94 (462) 008-482"))

(constraint (= (f "+82 685-122-086") "+82 (685) 122-086"))

(constraint (= (f "+82 675-366-472") "+82 (675) 366-472"))

(constraint (= (f "+80 066-433-096") "+80 (066) 433-096"))

(constraint (= (f "+163 039-436-166") "+163 (039) 436-166"))

(constraint (= (f "+138 808-083-074") "+138 (808) 083-074"))

(constraint (= (f "+42 643-245-738") "+42 (643) 245-738"))

(constraint (= (f "+169 822-542-726") "+169 (822) 542-726"))

(constraint (= (f "+176 767-782-369") "+176 (767) 782-369"))

(constraint (= (f "+47 414-369-343") "+47 (414) 369-343"))

(constraint (= (f "+138 885-618-512") "+138 (885) 618-512"))

(constraint (= (f "+104 158-671-355") "+104 (158) 671-355"))

(constraint (= (f "+188 280-087-526") "+188 (280) 087-526"))

(constraint (= (f "+50 268-571-336") "+50 (268) 571-336"))

(constraint (= (f "+183 225-960-024") "+183 (225) 960-024"))

(constraint (= (f "+58 191-982-491") "+58 (191) 982-491"))

(constraint (= (f "+9 507-092-535") "+9 (507) 092-535"))

(constraint (= (f "+64 061-601-398") "+64 (061) 601-398"))

(constraint (= (f "+189 831-591-877") "+189 (831) 591-877"))

(constraint (= (f "+129 425-765-844") "+129 (425) 765-844"))

(constraint (= (f "+94 856-734-046") "+94 (856) 734-046"))

(constraint (= (f "+35 082-845-261") "+35 (082) 845-261"))

(constraint (= (f "+185 394-622-272") "+185 (394) 622-272"))

(constraint (= (f "+163 905-707-740") "+163 (905) 707-740"))

(constraint (= (f "+23 448-213-807") "+23 (448) 213-807"))

(constraint (= (f "+42 634-077-089") "+42 (634) 077-089"))

(constraint (= (f "+18 051-287-382") "+18 (051) 287-382"))

(constraint (= (f "+29 773-545-520") "+29 (773) 545-520"))

(constraint (= (f "+43 249-097-743") "+43 (249) 097-743"))

(constraint (= (f "+158 674-736-891") "+158 (674) 736-891"))

(constraint (= (f "+45 124-771-454") "+45 (124) 771-454"))

(constraint (= (f "+180 029-457-654") "+180 (029) 457-654"))

(constraint (= (f "+75 227-250-652") "+75 (227) 250-652"))

(constraint (= (f "+5 528-317-854") "+5 (528) 317-854"))

(constraint (= (f "+81 849-629-290") "+81 (849) 629-290"))

(constraint (= (f "+46 005-119-176") "+46 (005) 119-176"))

(constraint (= (f "+108 150-380-705") "+108 (150) 380-705"))

(constraint (= (f "+40 122-224-247") "+40 (122) 224-247"))

(constraint (= (f "+68 890-680-027") "+68 (890) 680-027"))

(constraint (= (f "+169 060-204-504") "+169 (060) 204-504"))

(constraint (= (f "+95 620-820-945") "+95 (620) 820-945"))

(constraint (= (f "+43 592-938-846") "+43 (592) 938-846"))

(constraint (= (f "+7 023-296-647") "+7 (023) 296-647"))

(constraint (= (f "+20 541-401-396") "+20 (541) 401-396"))

(constraint (= (f "+64 751-365-934") "+64 (751) 365-934"))

(constraint (= (f "+163 546-119-476") "+163 (546) 119-476"))

(constraint (= (f "+198 557-666-779") "+198 (557) 666-779"))

(constraint (= (f "+14 673-759-017") "+14 (673) 759-017"))

(constraint (= (f "+161 086-020-168") "+161 (086) 020-168"))

(constraint (= (f "+65 970-575-488") "+65 (970) 575-488"))

(constraint (= (f "+2 455-126-377") "+2 (455) 126-377"))

(constraint (= (f "+196 728-585-376") "+196 (728) 585-376"))

(constraint (= (f "+33 117-430-125") "+33 (117) 430-125"))

(constraint (= (f "+195 488-831-768") "+195 (488) 831-768"))

(constraint (= (f "+86 468-718-108") "+86 (468) 718-108"))

(constraint (= (f "+194 278-716-950") "+194 (278) 716-950"))

(constraint (= (f "+43 730-685-847") "+43 (730) 685-847"))

(constraint (= (f "+140 794-289-551") "+140 (794) 289-551"))

(constraint (= (f "+21 679-740-834") "+21 (679) 740-834"))

(constraint (= (f "+98 717-997-323") "+98 (717) 997-323"))

(constraint (= (f "+47 401-100-231") "+47 (401) 100-231"))

(constraint (= (f "+143 726-462-368") "+143 (726) 462-368"))

(constraint (= (f "+147 864-005-968") "+147 (864) 005-968"))

(constraint (= (f "+130 590-757-665") "+130 (590) 757-665"))

(constraint (= (f "+197 700-858-976") "+197 (700) 858-976"))

(constraint (= (f "+158 344-541-946") "+158 (344) 541-946"))

(constraint (= (f "+56 242-901-234") "+56 (242) 901-234"))

(constraint (= (f "+132 313-075-754") "+132 (313) 075-754"))

(constraint (= (f "+130 517-953-149") "+130 (517) 953-149"))

(constraint (= (f "+158 684-878-743") "+158 (684) 878-743"))

(constraint (= (f "+52 836-582-035") "+52 (836) 582-035"))

(constraint (= (f "+138 117-484-671") "+138 (117) 484-671"))

(constraint (= (f "+50 012-148-873") "+50 (012) 148-873"))

(constraint (= (f "+105 048-919-483") "+105 (048) 919-483"))

(constraint (= (f "+18 209-851-997") "+18 (209) 851-997"))

(constraint (= (f "+176 938-056-084") "+176 (938) 056-084"))

(constraint (= (f "+141 018-132-973") "+141 (018) 132-973"))

(constraint (= (f "+199 936-162-415") "+199 (936) 162-415"))

(constraint (= (f "+33 547-051-264") "+33 (547) 051-264"))

(constraint (= (f "+161 233-981-513") "+161 (233) 981-513"))

(constraint (= (f "+115 101-728-328") "+115 (101) 728-328"))

(constraint (= (f "+45 095-746-635") "+45 (095) 746-635"))


(check-synth)
