# Supplementary material
Source: ML conference proceedings conference paper supplement (https://proceedings.neurips.cc/paper_files/paper/2022/hash/0113ef4642264adc2e6924a3cbbdf532-Abstract.html)
Supplement: Supplementary file 1 [file 0113ef4642264adc2e6924a3cbbdf532-Supplemental-Conference.zip › neurips_supplementary_cameraready/ec-master/PBE_Strings_Track/phone-long.sl]

(set-logic SLIA)

 

(synth-fun f ((name String)) String

    ((Start String (ntString))

     (ntString String (name " "

                       (str.++ ntString ntString)

                       (str.replace ntString ntString ntString)

                       (str.at ntString ntInt)

                       (int.to.str ntInt)

                       (str.substr ntString ntInt ntInt)))

      (ntInt Int (0 1 2 3 4 5

                  (+ ntInt ntInt)

                  (- ntInt ntInt)

                  (str.len ntString)

                  (str.to.int ntString)

                  (str.indexof ntString ntString ntInt)))

      (ntBool Bool (true false

                    (str.prefixof ntString ntString)

                    (str.suffixof ntString ntString)

                    (str.contains ntString ntString)))))


(declare-var name String)


(constraint (= (f "938-242-504") "938"))

(constraint (= (f "308-916-545") "308"))

(constraint (= (f "623-599-749") "623"))

(constraint (= (f "981-424-843") "981"))

(constraint (= (f "118-980-214") "118"))

(constraint (= (f "244-655-094") "244"))

(constraint (= (f "830-941-991") "830"))

(constraint (= (f "911-186-562") "911"))

(constraint (= (f "002-500-200") "002"))

(constraint (= (f "113-860-034") "113"))

(constraint (= (f "457-622-959") "457"))

(constraint (= (f "986-722-311") "986"))

(constraint (= (f "110-170-771") "110"))

(constraint (= (f "469-610-118") "469"))

(constraint (= (f "817-925-247") "817"))

(constraint (= (f "256-899-439") "256"))

(constraint (= (f "886-911-726") "886"))

(constraint (= (f "562-950-358") "562"))

(constraint (= (f "693-049-588") "693"))

(constraint (= (f "840-503-234") "840"))

(constraint (= (f "698-815-340") "698"))

(constraint (= (f "498-808-434") "498"))

(constraint (= (f "329-545-000") "329"))

(constraint (= (f "380-281-597") "380"))

(constraint (= (f "332-395-493") "332"))

(constraint (= (f "251-903-028") "251"))

(constraint (= (f "176-090-894") "176"))

(constraint (= (f "336-611-100") "336"))

(constraint (= (f "416-390-647") "416"))

(constraint (= (f "019-430-596") "019"))

(constraint (= (f "960-659-771") "960"))

(constraint (= (f "475-505-007") "475"))

(constraint (= (f "424-069-886") "424"))

(constraint (= (f "941-102-117") "941"))

(constraint (= (f "331-728-008") "331"))

(constraint (= (f "487-726-198") "487"))

(constraint (= (f "612-419-942") "612"))

(constraint (= (f "594-741-346") "594"))

(constraint (= (f "320-984-742") "320"))

(constraint (= (f "060-919-361") "060"))

(constraint (= (f "275-536-998") "275"))

(constraint (= (f "548-835-065") "548"))

(constraint (= (f "197-485-507") "197"))

(constraint (= (f "455-776-949") "455"))

(constraint (= (f "085-421-340") "085"))

(constraint (= (f "785-713-099") "785"))

(constraint (= (f "426-712-861") "426"))

(constraint (= (f "386-994-906") "386"))

(constraint (= (f "918-304-840") "918"))

(constraint (= (f "247-153-598") "247"))

(constraint (= (f "075-497-069") "075"))

(constraint (= (f "140-726-583") "140"))

(constraint (= (f "049-413-248") "049"))

(constraint (= (f "977-386-462") "977"))

(constraint (= (f "058-272-455") "058"))

(constraint (= (f "428-629-927") "428"))

(constraint (= (f "449-122-191") "449"))

(constraint (= (f "568-759-670") "568"))

(constraint (= (f "312-846-053") "312"))

(constraint (= (f "943-037-297") "943"))

(constraint (= (f "014-270-177") "014"))

(constraint (= (f "658-877-878") "658"))

(constraint (= (f "888-594-038") "888"))

(constraint (= (f "232-253-254") "232"))

(constraint (= (f "308-722-292") "308"))

(constraint (= (f "342-145-742") "342"))

(constraint (= (f "568-181-515") "568"))

(constraint (= (f "300-140-756") "300"))

(constraint (= (f "099-684-216") "099"))

(constraint (= (f "575-296-621") "575"))

(constraint (= (f "994-443-794") "994"))

(constraint (= (f "400-334-692") "400"))

(constraint (= (f "684-711-883") "684"))

(constraint (= (f "539-636-358") "539"))

(constraint (= (f "009-878-919") "009"))

(constraint (= (f "919-545-701") "919"))

(constraint (= (f "546-399-239") "546"))

(constraint (= (f "993-608-757") "993"))

(constraint (= (f "107-652-845") "107"))

(constraint (= (f "206-805-793") "206"))

(constraint (= (f "198-857-684") "198"))

(constraint (= (f "912-827-430") "912"))

(constraint (= (f "560-951-766") "560"))

(constraint (= (f "142-178-290") "142"))

(constraint (= (f "732-196-946") "732"))

(constraint (= (f "963-875-745") "963"))

(constraint (= (f "881-865-867") "881"))

(constraint (= (f "234-686-715") "234"))

(constraint (= (f "720-330-583") "720"))

(constraint (= (f "593-065-126") "593"))

(constraint (= (f "671-778-064") "671"))

(constraint (= (f "252-029-036") "252"))

(constraint (= (f "700-322-036") "700"))

(constraint (= (f "882-587-473") "882"))

(constraint (= (f "964-134-953") "964"))

(constraint (= (f "038-300-876") "038"))

(constraint (= (f "158-894-947") "158"))

(constraint (= (f "757-454-374") "757"))

(constraint (= (f "872-513-190") "872"))

(constraint (= (f "566-086-726") "566"))


(check-synth)
