# Supplementary material
Source: ML conference proceedings conference paper supplement (https://proceedings.neurips.cc/paper_files/paper/2022/hash/0113ef4642264adc2e6924a3cbbdf532-Abstract.html)
Supplement: Supplementary file 1 [file 0113ef4642264adc2e6924a3cbbdf532-Supplemental-Conference.zip › neurips_supplementary_cameraready/ec-master/PBE_Strings_Track/phone_short.sl]

(set-logic SLIA)

 

(synth-fun f ((name String)) String

    ((Start String (ntString))

     (ntString String (name " "

                       (str.++ ntString ntString)

                       (str.replace ntString ntString ntString)

                       (str.at ntString ntInt)

                       (str.substr ntString ntInt ntInt)))

      (ntInt Int (0 1 2 3 

                  (+ ntInt ntInt)

                  (- ntInt ntInt)

                  (str.len ntString)

                  (str.indexof ntString ntString ntInt)))

      (ntBool Bool (true false

                    (str.prefixof ntString ntString)

                    (str.suffixof ntString ntString)

                    (str.contains ntString ntString)))))


(declare-var name String)


(constraint (= (f "938-242-504") "938"))

(constraint (= (f "308-916-545") "308"))

(constraint (= (f "623-599-749") "623"))

(constraint (= (f "981-424-843") "981"))

(constraint (= (f "118-980-214") "118"))

(constraint (= (f "244-655-094") "244"))


(check-synth)
