# Supplementary material
Source: ML conference proceedings conference paper supplement (https://proceedings.neurips.cc/paper_files/paper/2022/hash/0113ef4642264adc2e6924a3cbbdf532-Abstract.html)
Supplement: Supplementary file 1 [file 0113ef4642264adc2e6924a3cbbdf532-Supplemental-Conference.zip › neurips_supplementary_cameraready/ec-master/PBE_Strings_Track/reverse-name_short.sl]

(set-logic SLIA)

 

(synth-fun f ((firstname String) (lastname String)) String

    ((Start String (ntString))

     (ntString String (firstname lastname " "

                       (str.++ ntString ntString)

                       (str.replace ntString ntString ntString)

                       (str.at ntString ntInt)

                       (str.substr ntString ntInt ntInt)))

      (ntInt Int (0 1 2

                  (+ ntInt ntInt)

                  (- ntInt ntInt)

                  (str.len ntString)

                  (str.indexof ntString ntString ntInt)))

      (ntBool Bool (true false

                    (str.prefixof ntString ntString)

                    (str.suffixof ntString ntString)

                    (str.contains ntString ntString)))))


(declare-var firstname String)

(declare-var lastname String)


(constraint (= (f "Launa" "Withers") "Withers Launa"))

(constraint (= (f "Lakenya" "Edison") "Edison Lakenya"))

(constraint (= (f "Brendan" "Hage") "Hage Brendan"))

(constraint (= (f "Bradford" "Lango") "Lango Bradford"))

(constraint (= (f "Rudolf" "Akiyama") "Akiyama Rudolf"))

(constraint (= (f "Lara" "Constable") "Constable Lara"))

 

(check-synth)
