# Supplementary material
Source: ML conference proceedings conference paper supplement (https://proceedings.neurips.cc/paper_files/paper/2022/hash/0113ef4642264adc2e6924a3cbbdf532-Abstract.html)
Supplement: Supplementary file 1 [file 0113ef4642264adc2e6924a3cbbdf532-Supplemental-Conference.zip › neurips_supplementary_cameraready/ec-master/PBE_Strings_Track/univ_6-long-repeat.sl]

(set-logic SLIA)

 

(synth-fun f ((col1 String) (col2 String)) String

    ((Start String (ntString))

     (ntString String (col1 col2 "New York" " " "," "AK" "AZ" "AR" "CA" "CO" "CT" "DE" "FL" "GA" "HI" "ID" "IL" "IN" "IA" "KS" "KY" "LA" "ME" "MD" "MA" "MI" "MN" "MS" "MO" "MT" "NE" "NV" "NH" "NJ" "NM" "NY" "NC" "ND" "OH" "OK" "OR" "PA" "RI" "SC" "SD" "TN" "TX" "UT" "VT" "VA" "WA" "WV" "WI" "USA"

                       (str.++ ntString ntString)

                       (str.replace ntString ntString ntString)

                       (str.at ntString ntInt)

                       (ite ntBool ntString ntString)

                       (str.substr ntString ntInt ntInt)))

      (ntInt Int (0 1 2

                  (+ ntInt ntInt)

                  (- ntInt ntInt)

                  (str.len ntString)

                  (str.indexof ntString ntString ntInt)))

      (ntBool Bool (true false

                    (str.prefixof ntString ntString)

                    (str.suffixof ntString ntString)))))


(declare-var col1 String)

(declare-var col2 String)


(constraint (= (f "UC Berkeley" "Berkeley, CA") 

                  "Berkeley, CA, USA"))


(constraint (= (f "University of Pennsylvania" "Phialdelphia, PA, USA") 

                  "Phialdelphia, PA, USA"))


(constraint (= (f "UCLA" "Los Angeles, CA") 

                    "UCLA, Los Angeles, CA, USA"))


(constraint (= (f "Cornell University" "Ithaca, New York, USA") 

                  "Ithaca, NY, USA"))


(constraint (= (f "Penn" "Philadelphia, PA, USA") 

                  "Philadelphia, PA, USA"))


(constraint (= (f "University of Michigan" "Ann Arbor, MI, USA") 

                  "Ann Arbor, MI, USA"))


(constraint (= (f "UC Berkeley" "Berkeley, CA") 

                  "Berkeley, CA, USA"))


(constraint (= (f "MIT" "Cambridge, MA") 

                  "Cambridge, MA, USA"))


(constraint (= (f "University of Pennsylvania" "Phialdelphia, PA, USA") 

                  "Phialdelphia, PA, USA"))


(constraint (= (f "UCLA" "Los Angeles, CA") 

                    "Los Angeles, CA, USA"))                  


(constraint (= (f "University of Maryland College Park" "College Park, MD")   

                  "College Park, MD, USA"))


(constraint (= (f "University of Michigan" "Ann Arbor, MI, USA") 

                  "Ann Arbor, MI, USA"))


(constraint (= (f "UC Berkeley" "Berkeley, CA") 

                  "Berkeley, CA, USA"))


(constraint (= (f "MIT" "Cambridge, MA") 

                  "Cambridge, MA, USA"))


(constraint (= (f "Rice University" "Houston, TX") 

                  "Houston, TX, USA"))


(constraint (= (f "Yale University" "New Haven, CT, USA") 

                  "New Haven, CT, USA"))


(constraint (= (f "Columbia University" "New York, NY, USA") 

                  "New York, NY, USA"))


(constraint (= (f "NYU" "New York, New York, USA") 

                  "New York, NY, USA"))


(constraint (= (f "Drexel University" "Philadelphia, PA") 

                  "Philadelphia, PA, USA"))                  


(constraint (= (f "UC Berkeley" "Berkeley, CA") 

                  "Berkeley, CA, USA"))


(constraint (= (f "UIUC" "Urbana, IL") 

                  "Urbana, IL, USA"))


(constraint (= (f "Temple University" "Philadelphia, PA") 

                  "Philadelphia, PA, USA"))


(constraint (= (f "Harvard University" "Cambridge, MA, USA") 

                  "Cambridge, MA, USA"))


(constraint (= (f "University of Connecticut" "Storrs, CT, USA") 

                  "Storrs, CT, USA"))


(constraint (= (f "Drexel University" "Philadelphia, PA") 

                  "DPhiladelphia, PA, USA"))


(constraint (= (f "NYU" "New York, New York, USA") 

                  "New York, NY, USA"))  


(constraint (= (f "UIUC" "Urbana, IL") 

                  "Urbana, IL, USA"))                                  


(constraint (= (f "New Haven University" "New Haven, CT, USA") 

                  "New Haven, CT, USA"))


(constraint (= (f "University of California, Santa Barbara" "Santa Barbara, CA, USA") 

                  "Santa Barbara, CA, USA"))


(constraint (= (f "University of Connecticut" "Storrs, CT, USA") 

                  "Storrs, CT, USA"))                  


 

(check-synth)
