# Supplementary material
Source: ML conference proceedings conference paper supplement (https://proceedings.neurips.cc/paper_files/paper/2022/hash/0113ef4642264adc2e6924a3cbbdf532-Abstract.html)
Supplement: Supplementary file 1 [file 0113ef4642264adc2e6924a3cbbdf532-Supplemental-Conference.zip › neurips_supplementary_cameraready/ec-master/runtests]

#!/bin/bash

# Ensure tests are run from project root
cd "$( dirname "${BASH_SOURCE[0]}" )"

# Run dreamcoder unit tests
python -m unittest discover tests
