# Supplementary material
Source: ML conference proceedings conference paper supplement (https://proceedings.neurips.cc/paper_files/paper/2022/hash/0113ef4642264adc2e6924a3cbbdf532-Abstract.html)
Supplement: Supplementary file 1 [file 0113ef4642264adc2e6924a3cbbdf532-Supplemental-Conference.zip › neurips_supplementary_cameraready/ec-master/rust_compressor/Cargo.lock]

[[package]]
name = "ansi_term"
version = "0.11.0"
source = "registry+https://github.com/rust-lang/crates.io-index"
dependencies = [
 "winapi 0.3.5 (registry+https://github.com/rust-lang/crates.io-index)",
]

[[package]]
name = "arrayvec"
version = "0.4.7"
source = "registry+https://github.com/rust-lang/crates.io-index"
dependencies = [
 "nodrop 0.1.12 (registry+https://github.com/rust-lang/crates.io-index)",
]

[[package]]
name = "atty"
version = "0.2.11"
source = "registry+https://github.com/rust-lang/crates.io-index"
dependencies = [
 "libc 0.2.43 (registry+https://github.com/rust-lang/crates.io-index)",
 "termion 1.5.1 (registry+https://github.com/rust-lang/crates.io-index)",
 "winapi 0.3.5 (registry+https://github.com/rust-lang/crates.io-index)",
]

[[package]]
name = "bitflags"
version = "1.0.4"
source = "registry+https://github.com/rust-lang/crates.io-index"

[[package]]
name = "cfg-if"
version = "0.1.5"
source = "registry+https://github.com/rust-lang/crates.io-index"

[[package]]
name = "chashmap"
version = "2.2.0"
source = "registry+https://github.com/rust-lang/crates.io-index"
dependencies = [
 "owning_ref 0.2.4 (registry+https://github.com/rust-lang/crates.io-index)",
 "parking_lot 0.3.8 (registry+https://github.com/rust-lang/crates.io-index)",
]

[[package]]
name = "clap"
version = "2.32.0"
source = "registry+https://github.com/rust-lang/crates.io-index"
dependencies = [
 "ansi_term 0.11.0 (registry+https://github.com/rust-lang/crates.io-index)",
 "atty 0.2.11 (registry+https://github.com/rust-lang/crates.io-index)",
 "bitflags 1.0.4 (registry+https://github.com/rust-lang/crates.io-index)",
 "strsim 0.7.0 (registry+https://github.com/rust-lang/crates.io-index)",
 "textwrap 0.10.0 (registry+https://github.com/rust-lang/crates.io-index)",
 "unicode-width 0.1.5 (registry+https://github.com/rust-lang/crates.io-index)",
 "vec_map 0.8.1 (registry+https://github.com/rust-lang/crates.io-index)",
]

[[package]]
name = "cloudabi"
version = "0.0.3"
source = "registry+https://github.com/rust-lang/crates.io-index"
dependencies = [
 "bitflags 1.0.4 (registry+https://github.com/rust-lang/crates.io-index)",
]

[[package]]
name = "crossbeam-channel"
version = "0.2.4"
source = "registry+https://github.com/rust-lang/crates.io-index"
dependencies = [
 "crossbeam-epoch 0.5.2 (registry+https://github.com/rust-lang/crates.io-index)",
 "crossbeam-utils 0.5.0 (registry+https://github.com/rust-lang/crates.io-index)",
 "parking_lot 0.6.3 (registry+https://github.com/rust-lang/crates.io-index)",
 "rand 0.5.5 (registry+https://github.com/rust-lang/crates.io-index)",
 "smallvec 0.6.4 (registry+https://github.com/rust-lang/crates.io-index)",
]

[[package]]
name = "crossbeam-deque"
version = "0.2.0"
source = "registry+https://github.com/rust-lang/crates.io-index"
dependencies = [
 "crossbeam-epoch 0.3.1 (registry+https://github.com/rust-lang/crates.io-index)",
 "crossbeam-utils 0.2.2 (registry+https://github.com/rust-lang/crates.io-index)",
]

[[package]]
name = "crossbeam-epoch"
version = "0.3.1"
source = "registry+https://github.com/rust-lang/crates.io-index"
dependencies = [
 "arrayvec 0.4.7 (registry+https://github.com/rust-lang/crates.io-index)",
 "cfg-if 0.1.5 (registry+https://github.com/rust-lang/crates.io-index)",
 "crossbeam-utils 0.2.2 (registry+https://github.com/rust-lang/crates.io-index)",
 "lazy_static 1.1.0 (registry+https://github.com/rust-lang/crates.io-index)",
 "memoffset 0.2.1 (registry+https://github.com/rust-lang/crates.io-index)",
 "nodrop 0.1.12 (registry+https://github.com/rust-lang/crates.io-index)",
 "scopeguard 0.3.3 (registry+https://github.com/rust-lang/crates.io-index)",
]

[[package]]
name = "crossbeam-epoch"
version = "0.5.2"
source = "registry+https://github.com/rust-lang/crates.io-index"
dependencies = [
 "arrayvec 0.4.7 (registry+https://github.com/rust-lang/crates.io-index)",
 "cfg-if 0.1.5 (registry+https://github.com/rust-lang/crates.io-index)",
 "crossbeam-utils 0.5.0 (registry+https://github.com/rust-lang/crates.io-index)",
 "lazy_static 1.1.0 (registry+https://github.com/rust-lang/crates.io-index)",
 "memoffset 0.2.1 (registry+https://github.com/rust-lang/crates.io-index)",
 "scopeguard 0.3.3 (registry+https://github.com/rust-lang/crates.io-index)",
]

[[package]]
name = "crossbeam-utils"
version = "0.2.2"
source = "registry+https://github.com/rust-lang/crates.io-index"
dependencies = [
 "cfg-if 0.1.5 (registry+https://github.com/rust-lang/crates.io-index)",
]

[[package]]
name = "crossbeam-utils"
version = "0.5.0"
source = "registry+https://github.com/rust-lang/crates.io-index"

[[package]]
name = "either"
version = "1.5.0"
source = "registry+https://github.com/rust-lang/crates.io-index"

[[package]]
name = "fuchsia-zircon"
version = "0.3.3"
source = "registry+https://github.com/rust-lang/crates.io-index"
dependencies = [
 "bitflags 1.0.4 (registry+https://github.com/rust-lang/crates.io-index)",
 "fuchsia-zircon-sys 0.3.3 (registry+https://github.com/rust-lang/crates.io-index)",
]

[[package]]
name = "fuchsia-zircon-sys"
version = "0.3.3"
source = "registry+https://github.com/rust-lang/crates.io-index"

[[package]]
name = "itertools"
version = "0.7.8"
source = "registry+https://github.com/rust-lang/crates.io-index"
dependencies = [
 "either 1.5.0 (registry+https://github.com/rust-lang/crates.io-index)",
]

[[package]]
name = "itoa"
version = "0.4.2"
source = "registry+https://github.com/rust-lang/crates.io-index"

[[package]]
name = "lazy_static"
version = "1.1.0"
source = "registry+https://github.com/rust-lang/crates.io-index"
dependencies = [
 "version_check 0.1.4 (registry+https://github.com/rust-lang/crates.io-index)",
]

[[package]]
name = "libc"
version = "0.2.43"
source = "registry+https://github.com/rust-lang/crates.io-index"

[[package]]
name = "lock_api"
version = "0.1.3"
source = "registry+https://github.com/rust-lang/crates.io-index"
dependencies = [
 "owning_ref 0.3.3 (registry+https://github.com/rust-lang/crates.io-index)",
 "scopeguard 0.3.3 (registry+https://github.com/rust-lang/crates.io-index)",
]

[[package]]
name = "maplit"
version = "1.0.1"
source = "registry+https://github.com/rust-lang/crates.io-index"

[[package]]
name = "memchr"
version = "2.0.1"
source = "registry+https://github.com/rust-lang/crates.io-index"
dependencies = [
 "libc 0.2.43 (registry+https://github.com/rust-lang/crates.io-index)",
]

[[package]]
name = "memoffset"
version = "0.2.1"
source = "registry+https://github.com/rust-lang/crates.io-index"

[[package]]
name = "nodrop"
version = "0.1.12"
source = "registry+https://github.com/rust-lang/crates.io-index"

[[package]]
name = "nom"
version = "4.0.0"
source = "registry+https://github.com/rust-lang/crates.io-index"
dependencies = [
 "memchr 2.0.1 (registry+https://github.com/rust-lang/crates.io-index)",
]

[[package]]
name = "num_cpus"
version = "1.8.0"
source = "registry+https://github.com/rust-lang/crates.io-index"
dependencies = [
 "libc 0.2.43 (registry+https://github.com/rust-lang/crates.io-index)",
]

[[package]]
name = "owning_ref"
version = "0.2.4"
source = "registry+https://github.com/rust-lang/crates.io-index"

[[package]]
name = "owning_ref"
version = "0.3.3"
source = "registry+https://github.com/rust-lang/crates.io-index"
dependencies = [
 "stable_deref_trait 1.1.1 (registry+https://github.com/rust-lang/crates.io-index)",
]

[[package]]
name = "parking_lot"
version = "0.3.8"
source = "registry+https://github.com/rust-lang/crates.io-index"
dependencies = [
 "owning_ref 0.2.4 (registry+https://github.com/rust-lang/crates.io-index)",
 "parking_lot_core 0.2.14 (registry+https://github.com/rust-lang/crates.io-index)",
 "thread-id 3.3.0 (registry+https://github.com/rust-lang/crates.io-index)",
]

[[package]]
name = "parking_lot"
version = "0.6.3"
source = "registry+https://github.com/rust-lang/crates.io-index"
dependencies = [
 "lock_api 0.1.3 (registry+https://github.com/rust-lang/crates.io-index)",
 "parking_lot_core 0.2.14 (registry+https://github.com/rust-lang/crates.io-index)",
]

[[package]]
name = "parking_lot_core"
version = "0.2.14"
source = "registry+https://github.com/rust-lang/crates.io-index"
dependencies = [
 "libc 0.2.43 (registry+https://github.com/rust-lang/crates.io-index)",
 "rand 0.4.3 (registry+https://github.com/rust-lang/crates.io-index)",
 "smallvec 0.6.4 (registry+https://github.com/rust-lang/crates.io-index)",
 "winapi 0.3.5 (registry+https://github.com/rust-lang/crates.io-index)",
]

[[package]]
name = "polytype"
version = "6.0.0"
source = "registry+https://github.com/rust-lang/crates.io-index"
dependencies = [
 "itertools 0.7.8 (registry+https://github.com/rust-lang/crates.io-index)",
 "nom 4.0.0 (registry+https://github.com/rust-lang/crates.io-index)",
]

[[package]]
name = "proc-macro2"
version = "0.4.13"
source = "registry+https://github.com/rust-lang/crates.io-index"
dependencies = [
 "unicode-xid 0.1.0 (registry+https://github.com/rust-lang/crates.io-index)",
]

[[package]]
name = "programinduction"
version = "0.7.4"
source = "registry+https://github.com/rust-lang/crates.io-index"
dependencies = [
 "crossbeam-channel 0.2.4 (registry+https://github.com/rust-lang/crates.io-index)",
 "itertools 0.7.8 (registry+https://github.com/rust-lang/crates.io-index)",
 "lazy_static 1.1.0 (registry+https://github.com/rust-lang/crates.io-index)",
 "maplit 1.0.1 (registry+https://github.com/rust-lang/crates.io-index)",
 "nom 4.0.0 (registry+https://github.com/rust-lang/crates.io-index)",
 "polytype 6.0.0 (registry+https://github.com/rust-lang/crates.io-index)",
 "rand 0.5.5 (registry+https://github.com/rust-lang/crates.io-index)",
 "rayon 1.0.2 (registry+https://github.com/rust-lang/crates.io-index)",
 "term_rewriting 0.3.0 (registry+https://github.com/rust-lang/crates.io-index)",
]

[[package]]
name = "quote"
version = "0.6.6"
source = "registry+https://github.com/rust-lang/crates.io-index"
dependencies = [
 "proc-macro2 0.4.13 (registry+https://github.com/rust-lang/crates.io-index)",
]

[[package]]
name = "rand"
version = "0.4.3"
source = "registry+https://github.com/rust-lang/crates.io-index"
dependencies = [
 "fuchsia-zircon 0.3.3 (registry+https://github.com/rust-lang/crates.io-index)",
 "libc 0.2.43 (registry+https://github.com/rust-lang/crates.io-index)",
 "winapi 0.3.5 (registry+https://github.com/rust-lang/crates.io-index)",
]

[[package]]
name = "rand"
version = "0.5.5"
source = "registry+https://github.com/rust-lang/crates.io-index"
dependencies = [
 "cloudabi 0.0.3 (registry+https://github.com/rust-lang/crates.io-index)",
 "fuchsia-zircon 0.3.3 (registry+https://github.com/rust-lang/crates.io-index)",
 "libc 0.2.43 (registry+https://github.com/rust-lang/crates.io-index)",
 "rand_core 0.2.1 (registry+https://github.com/rust-lang/crates.io-index)",
 "winapi 0.3.5 (registry+https://github.com/rust-lang/crates.io-index)",
]

[[package]]
name = "rand_core"
version = "0.2.1"
source = "registry+https://github.com/rust-lang/crates.io-index"

[[package]]
name = "rayon"
version = "1.0.2"
source = "registry+https://github.com/rust-lang/crates.io-index"
dependencies = [
 "crossbeam-deque 0.2.0 (registry+https://github.com/rust-lang/crates.io-index)",
 "either 1.5.0 (registry+https://github.com/rust-lang/crates.io-index)",
 "rayon-core 1.4.1 (registry+https://github.com/rust-lang/crates.io-index)",
]

[[package]]
name = "rayon-core"
version = "1.4.1"
source = "registry+https://github.com/rust-lang/crates.io-index"
dependencies = [
 "crossbeam-deque 0.2.0 (registry+https://github.com/rust-lang/crates.io-index)",
 "lazy_static 1.1.0 (registry+https://github.com/rust-lang/crates.io-index)",
 "libc 0.2.43 (registry+https://github.com/rust-lang/crates.io-index)",
 "num_cpus 1.8.0 (registry+https://github.com/rust-lang/crates.io-index)",
]

[[package]]
name = "redox_syscall"
version = "0.1.40"
source = "registry+https://github.com/rust-lang/crates.io-index"

[[package]]
name = "redox_termios"
version = "0.1.1"
source = "registry+https://github.com/rust-lang/crates.io-index"
dependencies = [
 "redox_syscall 0.1.40 (registry+https://github.com/rust-lang/crates.io-index)",
]

[[package]]
name = "rust_compressor"
version = "0.2.0"
dependencies = [
 "chashmap 2.2.0 (registry+https://github.com/rust-lang/crates.io-index)",
 "clap 2.32.0 (registry+https://github.com/rust-lang/crates.io-index)",
 "itertools 0.7.8 (registry+https://github.com/rust-lang/crates.io-index)",
 "polytype 6.0.0 (registry+https://github.com/rust-lang/crates.io-index)",
 "programinduction 0.7.4 (registry+https://github.com/rust-lang/crates.io-index)",
 "rayon 1.0.2 (registry+https://github.com/rust-lang/crates.io-index)",
 "serde 1.0.72 (registry+https://github.com/rust-lang/crates.io-index)",
 "serde_derive 1.0.72 (registry+https://github.com/rust-lang/crates.io-index)",
 "serde_json 1.0.26 (registry+https://github.com/rust-lang/crates.io-index)",
]

[[package]]
name = "ryu"
version = "0.2.4"
source = "registry+https://github.com/rust-lang/crates.io-index"

[[package]]
name = "scopeguard"
version = "0.3.3"
source = "registry+https://github.com/rust-lang/crates.io-index"

[[package]]
name = "serde"
version = "1.0.72"
source = "registry+https://github.com/rust-lang/crates.io-index"

[[package]]
name = "serde_derive"
version = "1.0.72"
source = "registry+https://github.com/rust-lang/crates.io-index"
dependencies = [
 "proc-macro2 0.4.13 (registry+https://github.com/rust-lang/crates.io-index)",
 "quote 0.6.6 (registry+https://github.com/rust-lang/crates.io-index)",
 "syn 0.14.9 (registry+https://github.com/rust-lang/crates.io-index)",
]

[[package]]
name = "serde_json"
version = "1.0.26"
source = "registry+https://github.com/rust-lang/crates.io-index"
dependencies = [
 "itoa 0.4.2 (registry+https://github.com/rust-lang/crates.io-index)",
 "ryu 0.2.4 (registry+https://github.com/rust-lang/crates.io-index)",
 "serde 1.0.72 (registry+https://github.com/rust-lang/crates.io-index)",
]

[[package]]
name = "smallvec"
version = "0.6.4"
source = "registry+https://github.com/rust-lang/crates.io-index"
dependencies = [
 "unreachable 1.0.0 (registry+https://github.com/rust-lang/crates.io-index)",
]

[[package]]
name = "stable_deref_trait"
version = "1.1.1"
source = "registry+https://github.com/rust-lang/crates.io-index"

[[package]]
name = "strsim"
version = "0.7.0"
source = "registry+https://github.com/rust-lang/crates.io-index"

[[package]]
name = "syn"
version = "0.14.9"
source = "registry+https://github.com/rust-lang/crates.io-index"
dependencies = [
 "proc-macro2 0.4.13 (registry+https://github.com/rust-lang/crates.io-index)",
 "quote 0.6.6 (registry+https://github.com/rust-lang/crates.io-index)",
 "unicode-xid 0.1.0 (registry+https://github.com/rust-lang/crates.io-index)",
]

[[package]]
name = "term_rewriting"
version = "0.3.0"
source = "registry+https://github.com/rust-lang/crates.io-index"
dependencies = [
 "itertools 0.7.8 (registry+https://github.com/rust-lang/crates.io-index)",
 "nom 4.0.0 (registry+https://github.com/rust-lang/crates.io-index)",
 "rand 0.5.5 (registry+https://github.com/rust-lang/crates.io-index)",
]

[[package]]
name = "termion"
version = "1.5.1"
source = "registry+https://github.com/rust-lang/crates.io-index"
dependencies = [
 "libc 0.2.43 (registry+https://github.com/rust-lang/crates.io-index)",
 "redox_syscall 0.1.40 (registry+https://github.com/rust-lang/crates.io-index)",
 "redox_termios 0.1.1 (registry+https://github.com/rust-lang/crates.io-index)",
]

[[package]]
name = "textwrap"
version = "0.10.0"
source = "registry+https://github.com/rust-lang/crates.io-index"
dependencies = [
 "unicode-width 0.1.5 (registry+https://github.com/rust-lang/crates.io-index)",
]

[[package]]
name = "thread-id"
version = "3.3.0"
source = "registry+https://github.com/rust-lang/crates.io-index"
dependencies = [
 "libc 0.2.43 (registry+https://github.com/rust-lang/crates.io-index)",
 "redox_syscall 0.1.40 (registry+https://github.com/rust-lang/crates.io-index)",
 "winapi 0.3.5 (registry+https://github.com/rust-lang/crates.io-index)",
]

[[package]]
name = "unicode-width"
version = "0.1.5"
source = "registry+https://github.com/rust-lang/crates.io-index"

[[package]]
name = "unicode-xid"
version = "0.1.0"
source = "registry+https://github.com/rust-lang/crates.io-index"

[[package]]
name = "unreachable"
version = "1.0.0"
source = "registry+https://github.com/rust-lang/crates.io-index"
dependencies = [
 "void 1.0.2 (registry+https://github.com/rust-lang/crates.io-index)",
]

[[package]]
name = "vec_map"
version = "0.8.1"
source = "registry+https://github.com/rust-lang/crates.io-index"

[[package]]
name = "version_check"
version = "0.1.4"
source = "registry+https://github.com/rust-lang/crates.io-index"

[[package]]
name = "void"
version = "1.0.2"
source = "registry+https://github.com/rust-lang/crates.io-index"

[[package]]
name = "winapi"
version = "0.3.5"
source = "registry+https://github.com/rust-lang/crates.io-index"
dependencies = [
 "winapi-i686-pc-windows-gnu 0.4.0 (registry+https://github.com/rust-lang/crates.io-index)",
 "winapi-x86_64-pc-windows-gnu 0.4.0 (registry+https://github.com/rust-lang/crates.io-index)",
]

[[package]]
name = "winapi-i686-pc-windows-gnu"
version = "0.4.0"
source = "registry+https://github.com/rust-lang/crates.io-index"

[[package]]
name = "winapi-x86_64-pc-windows-gnu"
version = "0.4.0"
source = "registry+https://github.com/rust-lang/crates.io-index"

[metadata]
"checksum ansi_term 0.11.0 (registry+https://github.com/rust-lang/crates.io-index)" = "ee49baf6cb617b853aa8d93bf420db2383fab46d314482ca2803b40d5fde979b"
"checksum arrayvec 0.4.7 (registry+https://github.com/rust-lang/crates.io-index)" = "a1e964f9e24d588183fcb43503abda40d288c8657dfc27311516ce2f05675aef"
"checksum atty 0.2.11 (registry+https://github.com/rust-lang/crates.io-index)" = "9a7d5b8723950951411ee34d271d99dddcc2035a16ab25310ea2c8cfd4369652"
"checksum bitflags 1.0.4 (registry+https://github.com/rust-lang/crates.io-index)" = "228047a76f468627ca71776ecdebd732a3423081fcf5125585bcd7c49886ce12"
"checksum cfg-if 0.1.5 (registry+https://github.com/rust-lang/crates.io-index)" = "0c4e7bb64a8ebb0d856483e1e682ea3422f883c5f5615a90d51a2c82fe87fdd3"
"checksum chashmap 2.2.0 (registry+https://github.com/rust-lang/crates.io-index)" = "47e651a8c1eb0cbbaa730f705e2531e75276c6f2bbe2eb12662cfd305213dff8"
"checksum clap 2.32.0 (registry+https://github.com/rust-lang/crates.io-index)" = "b957d88f4b6a63b9d70d5f454ac8011819c6efa7727858f458ab71c756ce2d3e"
"checksum cloudabi 0.0.3 (registry+https://github.com/rust-lang/crates.io-index)" = "ddfc5b9aa5d4507acaf872de71051dfd0e309860e88966e1051e462a077aac4f"
"checksum crossbeam-channel 0.2.4 (registry+https://github.com/rust-lang/crates.io-index)" = "6c0a94250b0278d7fc5a894c3d276b11ea164edc8bf8feb10ca1ea517b44a649"
"checksum crossbeam-deque 0.2.0 (registry+https://github.com/rust-lang/crates.io-index)" = "f739f8c5363aca78cfb059edf753d8f0d36908c348f3d8d1503f03d8b75d9cf3"
"checksum crossbeam-epoch 0.3.1 (registry+https://github.com/rust-lang/crates.io-index)" = "927121f5407de9956180ff5e936fe3cf4324279280001cd56b669d28ee7e9150"
"checksum crossbeam-epoch 0.5.2 (registry+https://github.com/rust-lang/crates.io-index)" = "30fecfcac6abfef8771151f8be4abc9e4edc112c2bcb233314cafde2680536e9"
"checksum crossbeam-utils 0.2.2 (registry+https://github.com/rust-lang/crates.io-index)" = "2760899e32a1d58d5abb31129f8fae5de75220bc2176e77ff7c627ae45c918d9"
"checksum crossbeam-utils 0.5.0 (registry+https://github.com/rust-lang/crates.io-index)" = "677d453a17e8bd2b913fa38e8b9cf04bcdbb5be790aa294f2389661d72036015"
"checksum either 1.5.0 (registry+https://github.com/rust-lang/crates.io-index)" = "3be565ca5c557d7f59e7cfcf1844f9e3033650c929c6566f511e8005f205c1d0"
"checksum fuchsia-zircon 0.3.3 (registry+https://github.com/rust-lang/crates.io-index)" = "2e9763c69ebaae630ba35f74888db465e49e259ba1bc0eda7d06f4a067615d82"
"checksum fuchsia-zircon-sys 0.3.3 (registry+https://github.com/rust-lang/crates.io-index)" = "3dcaa9ae7725d12cdb85b3ad99a434db70b468c09ded17e012d86b5c1010f7a7"
"checksum itertools 0.7.8 (registry+https://github.com/rust-lang/crates.io-index)" = "f58856976b776fedd95533137617a02fb25719f40e7d9b01c7043cd65474f450"
"checksum itoa 0.4.2 (registry+https://github.com/rust-lang/crates.io-index)" = "5adb58558dcd1d786b5f0bd15f3226ee23486e24b7b58304b60f64dc68e62606"
"checksum lazy_static 1.1.0 (registry+https://github.com/rust-lang/crates.io-index)" = "ca488b89a5657b0a2ecd45b95609b3e848cf1755da332a0da46e2b2b1cb371a7"
"checksum libc 0.2.43 (registry+https://github.com/rust-lang/crates.io-index)" = "76e3a3ef172f1a0b9a9ff0dd1491ae5e6c948b94479a3021819ba7d860c8645d"
"checksum lock_api 0.1.3 (registry+https://github.com/rust-lang/crates.io-index)" = "949826a5ccf18c1b3a7c3d57692778d21768b79e46eb9dd07bfc4c2160036c54"
"checksum maplit 1.0.1 (registry+https://github.com/rust-lang/crates.io-index)" = "08cbb6b4fef96b6d77bfc40ec491b1690c779e77b05cd9f07f787ed376fd4c43"
"checksum memchr 2.0.1 (registry+https://github.com/rust-lang/crates.io-index)" = "796fba70e76612589ed2ce7f45282f5af869e0fdd7cc6199fa1aa1f1d591ba9d"
"checksum memoffset 0.2.1 (registry+https://github.com/rust-lang/crates.io-index)" = "0f9dc261e2b62d7a622bf416ea3c5245cdd5d9a7fcc428c0d06804dfce1775b3"
"checksum nodrop 0.1.12 (registry+https://github.com/rust-lang/crates.io-index)" = "9a2228dca57108069a5262f2ed8bd2e82496d2e074a06d1ccc7ce1687b6ae0a2"
"checksum nom 4.0.0 (registry+https://github.com/rust-lang/crates.io-index)" = "898696750eb5c3ce5eb5afbfbe46e7f7c4e1936e19d3e97be4b7937da7b6d114"
"checksum num_cpus 1.8.0 (registry+https://github.com/rust-lang/crates.io-index)" = "c51a3322e4bca9d212ad9a158a02abc6934d005490c054a2778df73a70aa0a30"
"checksum owning_ref 0.2.4 (registry+https://github.com/rust-lang/crates.io-index)" = "9d52571ddcb42e9c900c901a18d8d67e393df723fcd51dd59c5b1a85d0acb6cc"
"checksum owning_ref 0.3.3 (registry+https://github.com/rust-lang/crates.io-index)" = "cdf84f41639e037b484f93433aa3897863b561ed65c6e59c7073d7c561710f37"
"checksum parking_lot 0.3.8 (registry+https://github.com/rust-lang/crates.io-index)" = "fa12d706797d42551663426a45e2db2e0364bd1dbf6aeada87e89c5f981f43e9"
"checksum parking_lot 0.6.3 (registry+https://github.com/rust-lang/crates.io-index)" = "69376b761943787ebd5cc85a5bc95958651a22609c5c1c2b65de21786baec72b"
"checksum parking_lot_core 0.2.14 (registry+https://github.com/rust-lang/crates.io-index)" = "4db1a8ccf734a7bce794cc19b3df06ed87ab2f3907036b693c68f56b4d4537fa"
"checksum polytype 6.0.0 (registry+https://github.com/rust-lang/crates.io-index)" = "28869dbd75d925c16a9757c44df8533219ba1b9208928623f91bb20dc1038002"
"checksum proc-macro2 0.4.13 (registry+https://github.com/rust-lang/crates.io-index)" = "ee5697238f0d893c7f0ecc59c0999f18d2af85e424de441178bcacc9f9e6cf67"
"checksum programinduction 0.7.4 (registry+https://github.com/rust-lang/crates.io-index)" = "8fe53fd54ea5c701dff6396e15a2dd52061b6f28157670c92b4dfb98fd20dc54"
"checksum quote 0.6.6 (registry+https://github.com/rust-lang/crates.io-index)" = "ed7d650913520df631972f21e104a4fa2f9c82a14afc65d17b388a2e29731e7c"
"checksum rand 0.4.3 (registry+https://github.com/rust-lang/crates.io-index)" = "8356f47b32624fef5b3301c1be97e5944ecdd595409cc5da11d05f211db6cfbd"
"checksum rand 0.5.5 (registry+https://github.com/rust-lang/crates.io-index)" = "e464cd887e869cddcae8792a4ee31d23c7edd516700695608f5b98c67ee0131c"
"checksum rand_core 0.2.1 (registry+https://github.com/rust-lang/crates.io-index)" = "edecf0f94da5551fc9b492093e30b041a891657db7940ee221f9d2f66e82eef2"
"checksum rayon 1.0.2 (registry+https://github.com/rust-lang/crates.io-index)" = "df7a791f788cb4c516f0e091301a29c2b71ef680db5e644a7d68835c8ae6dbfa"
"checksum rayon-core 1.4.1 (registry+https://github.com/rust-lang/crates.io-index)" = "b055d1e92aba6877574d8fe604a63c8b5df60f60e5982bf7ccbb1338ea527356"
"checksum redox_syscall 0.1.40 (registry+https://github.com/rust-lang/crates.io-index)" = "c214e91d3ecf43e9a4e41e578973adeb14b474f2bee858742d127af75a0112b1"
"checksum redox_termios 0.1.1 (registry+https://github.com/rust-lang/crates.io-index)" = "7e891cfe48e9100a70a3b6eb652fef28920c117d366339687bd5576160db0f76"
"checksum ryu 0.2.4 (registry+https://github.com/rust-lang/crates.io-index)" = "fd0568787116e13c652377b6846f5931454a363a8fdf8ae50463ee40935b278b"
"checksum scopeguard 0.3.3 (registry+https://github.com/rust-lang/crates.io-index)" = "94258f53601af11e6a49f722422f6e3425c52b06245a5cf9bc09908b174f5e27"
"checksum serde 1.0.72 (registry+https://github.com/rust-lang/crates.io-index)" = "98b72cb11d2f90a50789254281aac9211092fd1ba87e067b45c94652fffe1cf1"
"checksum serde_derive 1.0.72 (registry+https://github.com/rust-lang/crates.io-index)" = "ccb40724ad173e215530b5217ffba55cdf34ef811e90023a43c948c5b04dc41f"
"checksum serde_json 1.0.26 (registry+https://github.com/rust-lang/crates.io-index)" = "44dd2cfde475037451fa99b7e5df77aa3cfd1536575fa8e7a538ab36dcde49ae"
"checksum smallvec 0.6.4 (registry+https://github.com/rust-lang/crates.io-index)" = "211a489e65e94b103926d2054ae515a1cdb5d515ea0ef414fee23b7e043ce748"
"checksum stable_deref_trait 1.1.1 (registry+https://github.com/rust-lang/crates.io-index)" = "dba1a27d3efae4351c8051072d619e3ade2820635c3958d826bfea39d59b54c8"
"checksum strsim 0.7.0 (registry+https://github.com/rust-lang/crates.io-index)" = "bb4f380125926a99e52bc279241539c018323fab05ad6368b56f93d9369ff550"
"checksum syn 0.14.9 (registry+https://github.com/rust-lang/crates.io-index)" = "261ae9ecaa397c42b960649561949d69311f08eeaea86a65696e6e46517cf741"
"checksum term_rewriting 0.3.0 (registry+https://github.com/rust-lang/crates.io-index)" = "85e0a66847486c08a183ac247b6a5f1ecfc47595ecd11951d7b6f5664024fc6a"
"checksum termion 1.5.1 (registry+https://github.com/rust-lang/crates.io-index)" = "689a3bdfaab439fd92bc87df5c4c78417d3cbe537487274e9b0b2dce76e92096"
"checksum textwrap 0.10.0 (registry+https://github.com/rust-lang/crates.io-index)" = "307686869c93e71f94da64286f9a9524c0f308a9e1c87a583de8e9c9039ad3f6"
"checksum thread-id 3.3.0 (registry+https://github.com/rust-lang/crates.io-index)" = "c7fbf4c9d56b320106cd64fd024dadfa0be7cb4706725fc44a7d7ce952d820c1"
"checksum unicode-width 0.1.5 (registry+https://github.com/rust-lang/crates.io-index)" = "882386231c45df4700b275c7ff55b6f3698780a650026380e72dabe76fa46526"
"checksum unicode-xid 0.1.0 (registry+https://github.com/rust-lang/crates.io-index)" = "fc72304796d0818e357ead4e000d19c9c174ab23dc11093ac919054d20a6a7fc"
"checksum unreachable 1.0.0 (registry+https://github.com/rust-lang/crates.io-index)" = "382810877fe448991dfc7f0dd6e3ae5d58088fd0ea5e35189655f84e6814fa56"
"checksum vec_map 0.8.1 (registry+https://github.com/rust-lang/crates.io-index)" = "05c78687fb1a80548ae3250346c3db86a80a7cdd77bda190189f2d0a0987c81a"
"checksum version_check 0.1.4 (registry+https://github.com/rust-lang/crates.io-index)" = "7716c242968ee87e5542f8021178248f267f295a5c4803beae8b8b7fd9bc6051"
"checksum void 1.0.2 (registry+https://github.com/rust-lang/crates.io-index)" = "6a02e4885ed3bc0f2de90ea6dd45ebcbb66dacffe03547fadbb0eeae2770887d"
"checksum winapi 0.3.5 (registry+https://github.com/rust-lang/crates.io-index)" = "773ef9dcc5f24b7d850d0ff101e542ff24c3b090a9768e03ff889fdef41f00fd"
"checksum winapi-i686-pc-windows-gnu 0.4.0 (registry+https://github.com/rust-lang/crates.io-index)" = "ac3b87c63620426dd9b991e5ce0329eff545bccbbb34f3be09ff6fb6ab51b7b6"
"checksum winapi-x86_64-pc-windows-gnu 0.4.0 (registry+https://github.com/rust-lang/crates.io-index)" = "712e227841d057c1ee1cd2fb22fa7e5a5461ae8e48fa2ca79ec42cfc1931183f"
