# Supplementary material
Source: ML conference proceedings conference paper supplement (https://proceedings.neurips.cc/paper_files/paper/2022/hash/0113ef4642264adc2e6924a3cbbdf532-Abstract.html)
Supplement: Supplementary file 1 [file 0113ef4642264adc2e6924a3cbbdf532-Supplemental-Conference.zip › neurips_supplementary_cameraready/ec-master/rust_compressor/example_input.json]

{
    "strategy": "vs",
  "primitives": [
    {"name": "nand", "tp": "bool -> bool -> bool", "logp": -0.3677247801253172}
  ],
  "inventions": [],
  "variable_logprob": 0.07410797215372167,
  "params": {
    "pseudocounts": 5,
    "topk": 2,
    "structure_penalty": 1,
    "aic": 1,
    "arity": 2
  },
  "frontiers": [
    {
      "task_tp": "bool -> bool",
      "solutions": [{
        "expression": "(lambda (nand $0 (nand $0 $0)))",
        "logprior": -4,
        "loglikelihood": 0
      }]
    }, {
      "task_tp": "bool → bool → bool",
      "solutions": [{
        "expression": "(λ (λ $1))",
        "logprior": -1.3862943611198906,
        "loglikelihood": 0.0
      }]
    }, {
      "task_tp": "bool → bool → bool",
      "solutions": [{
        "expression": "(λ (λ $0))",
        "logprior": -1.3862943611198906,
        "loglikelihood": 0.0
      }]
    }, {
      "task_tp": "bool → bool → bool",
      "solutions": [{
        "expression": "(λ (λ $0))",
        "logprior": -1.3862943611198906,
        "loglikelihood": 0.0
      }]
    }, {
      "task_tp": "bool → bool → bool",
      "solutions": [{
        "expression": "(λ (λ (nand (nand $0 $0) $1)))",
        "logprior": -5.545177444479562,
        "loglikelihood": 0.0
      }]
    }, {
      "task_tp": "bool → bool → bool",
      "solutions": [{
        "expression": "(λ (λ (nand (nand $0 $0) (nand $1 $1))))",
        "logprior": -7.6246189861593989,
        "loglikelihood": 0.0
      }, {
        "expression": "(λ (λ (nand (nand $1 $1) (nand $0 $0))))",
        "logprior": -7.6246189861593989,
        "loglikelihood": 0.0
      }, {
        "expression": "(λ (λ (nand (nand (nand $0 $0) $1) (nand $0 $0))))",
        "logprior": -9.704060527839234,
        "loglikelihood": 0.0
      }, {
        "expression": "(λ (λ (nand (nand (nand $0 $1) $0) (nand $1 $1))))",
        "logprior": -9.704060527839234,
        "loglikelihood": 0.0
      }, {
        "expression": "(λ (λ (nand (nand (nand $0 $1) $1) (nand $0 $0))))",
        "logprior": -9.704060527839234,
        "loglikelihood": 0.0
      }, {
        "expression": "(λ (λ (nand (nand (nand $1 $0) $0) (nand $1 $1))))",
        "logprior": -9.704060527839234,
        "loglikelihood": 0.0
      }, {
        "expression": "(λ (λ (nand (nand (nand $1 $0) $1) (nand $0 $0))))",
        "logprior": -9.704060527839234,
        "loglikelihood": 0.0
      }, {
        "expression": "(λ (λ (nand (nand (nand $1 $1) $0) (nand $1 $1))))",
        "logprior": -9.704060527839234,
        "loglikelihood": 0.0
      }, {
        "expression": "(λ (λ (nand (nand $0 (nand $0 $1)) (nand $1 $1))))",
        "logprior": -9.704060527839234,
        "loglikelihood": 0.0
      }, {
        "expression": "(λ (λ (nand (nand $0 (nand $1 $0)) (nand $1 $1))))",
        "logprior": -9.704060527839234,
        "loglikelihood": 0.0
      }]
    }, {
      "task_tp": "bool → bool",
      "solutions": [{
        "expression": "(λ $0)",
        "logprior": -0.6931471805599453,
        "loglikelihood": 0.0
      }, {
        "expression": "(λ (nand (nand $0 $0) (nand $0 $0)))",
        "logprior": -4.852030263919617,
        "loglikelihood": 0.0
      }, {
        "expression": "(λ (nand (nand (nand $0 $0) $0) (nand $0 $0)))",
        "logprior": -6.238324625039508,
        "loglikelihood": 0.0
      }, {
        "expression": "(λ (nand (nand $0 (nand $0 $0)) (nand $0 $0)))",
        "logprior": -6.238324625039508,
        "loglikelihood": 0.0
      }, {
        "expression": "(λ (nand (nand $0 $0) (nand (nand $0 $0) $0)))",
        "logprior": -6.238324625039508,
        "loglikelihood": 0.0
      }, {
        "expression": "(λ (nand (nand $0 $0) (nand $0 (nand $0 $0))))",
        "logprior": -6.238324625039508,
        "loglikelihood": 0.0
      }, {
        "expression": "(λ (nand (nand (nand (nand $0 $0) $0) $0) (nand $0 $0)))",
        "logprior": -7.624618986159398,
        "loglikelihood": 0.0
      }, {
        "expression": "(λ (nand (nand (nand $0 (nand $0 $0)) $0) (nand $0 $0)))",
        "logprior": -7.624618986159398,
        "loglikelihood": 0.0
      }, {
        "expression": "(λ (nand (nand $0 (nand (nand $0 $0) $0)) (nand $0 $0)))",
        "logprior": -7.624618986159398,
        "loglikelihood": 0.0
      }, {
        "expression": "(λ (nand (nand $0 (nand $0 (nand $0 $0))) (nand $0 $0)))",
        "logprior": -7.624618986159398,
        "loglikelihood": 0.0
      }]
    }, {
      "task_tp": "bool → bool → bool → bool",
      "solutions": [{
        "expression": "(λ (λ (λ (nand (nand $0 $0) (nand $1 $2)))))",
        "logprior": -9.246479418592056,
        "loglikelihood": 0.0
      }, {
        "expression": "(λ (λ (λ (nand (nand $0 $0) (nand $2 $1)))))",
        "logprior": -9.246479418592056,
        "loglikelihood": 0.0
      }, {
        "expression": "(λ (λ (λ (nand (nand $1 $2) (nand $0 $0)))))",
        "logprior": -9.246479418592056,
        "loglikelihood": 0.0
      }, {
        "expression": "(λ (λ (λ (nand (nand $2 $1) (nand $0 $0)))))",
        "logprior": -9.246479418592056,
        "loglikelihood": 0.0
      }]
    }, {
      "task_tp": "bool → bool → bool",
      "solutions": [{
        "expression": "(λ (λ $0))",
        "logprior": -1.3862943611198906,
        "loglikelihood": 0.0
      }, {
        "expression": "(λ (λ (nand (nand $0 $0) (nand $0 $0))))",
        "logprior": -7.6246189861593989,
        "loglikelihood": 0.0
      }, {
        "expression": "(λ (λ (nand (nand $0 $0) (nand $0 $1))))",
        "logprior": -7.6246189861593989,
        "loglikelihood": 0.0
      }, {
        "expression": "(λ (λ (nand (nand $0 $0) (nand $1 $0))))",
        "logprior": -7.6246189861593989,
        "loglikelihood": 0.0
      }, {
        "expression": "(λ (λ (nand (nand $0 $1) (nand $0 $0))))",
        "logprior": -7.6246189861593989,
        "loglikelihood": 0.0
      }, {
        "expression": "(λ (λ (nand (nand $1 $0) (nand $0 $0))))",
        "logprior": -7.6246189861593989,
        "loglikelihood": 0.0
      }, {
        "expression": "(λ (λ (nand (nand (nand $0 $0) $0) (nand $0 $0))))",
        "logprior": -9.704060527839234,
        "loglikelihood": 0.0
      }, {
        "expression": "(λ (λ (nand (nand (nand $0 $1) $0) (nand $0 $0))))",
        "logprior": -9.704060527839234,
        "loglikelihood": 0.0
      }, {
        "expression": "(λ (λ (nand (nand (nand $0 $1) $0) (nand $0 $1))))",
        "logprior": -9.704060527839234,
        "loglikelihood": 0.0
      }, {
        "expression": "(λ (λ (nand (nand (nand $0 $1) $0) (nand $1 $0))))",
        "logprior": -9.704060527839234,
        "loglikelihood": 0.0
      }]
    }, {
      "task_tp": "bool → bool → bool → bool",
      "solutions": [{
        "expression": "(λ (λ (λ (nand (nand $0 $0) (nand $1 $2)))))",
        "logprior": -9.246479418592056,
        "loglikelihood": 0.0
      }, {
        "expression": "(λ (λ (λ (nand (nand $0 $0) (nand $2 $1)))))",
        "logprior": -9.246479418592056,
        "loglikelihood": 0.0
      }, {
        "expression": "(λ (λ (λ (nand (nand $1 $2) (nand $0 $0)))))",
        "logprior": -9.246479418592056,
        "loglikelihood": 0.0
      }, {
        "expression": "(λ (λ (λ (nand (nand $2 $1) (nand $0 $0)))))",
        "logprior": -9.246479418592056,
        "loglikelihood": 0.0
      }]
    }, {
      "task_tp": "bool → bool → bool → bool",
      "solutions": [{
        "expression": "(λ (λ (λ (nand (nand $0 $2) (nand $1 $2)))))",
        "logprior": -9.246479418592056,
        "loglikelihood": 0.0
      }, {
        "expression": "(λ (λ (λ (nand (nand $0 $2) (nand $2 $1)))))",
        "logprior": -9.246479418592056,
        "loglikelihood": 0.0
      }, {
        "expression": "(λ (λ (λ (nand (nand $1 $2) (nand $0 $2)))))",
        "logprior": -9.246479418592056,
        "loglikelihood": 0.0
      }, {
        "expression": "(λ (λ (λ (nand (nand $1 $2) (nand $2 $0)))))",
        "logprior": -9.246479418592056,
        "loglikelihood": 0.0
      }, {
        "expression": "(λ (λ (λ (nand (nand $2 $0) (nand $1 $2)))))",
        "logprior": -9.246479418592056,
        "loglikelihood": 0.0
      }, {
        "expression": "(λ (λ (λ (nand (nand $2 $0) (nand $2 $1)))))",
        "logprior": -9.246479418592056,
        "loglikelihood": 0.0
      }, {
        "expression": "(λ (λ (λ (nand (nand $2 $1) (nand $0 $2)))))",
        "logprior": -9.246479418592056,
        "loglikelihood": 0.0
      }, {
        "expression": "(λ (λ (λ (nand (nand $2 $1) (nand $2 $0)))))",
        "logprior": -9.246479418592056,
        "loglikelihood": 0.0
      }]
    }, {
      "task_tp": "bool → bool → bool → bool",
      "solutions": [{
        "expression": "(λ (λ (λ (nand (nand $1 $1) (nand $2 $2)))))",
        "logprior": -9.246479418592056,
        "loglikelihood": 0.0
      }, {
        "expression": "(λ (λ (λ (nand (nand $2 $2) (nand $1 $1)))))",
        "logprior": -9.246479418592056,
        "loglikelihood": 0.0
      }, {
        "expression": "(λ (λ (λ (nand (nand (nand $0 $1) $2) (nand $1 $1)))))",
        "logprior": -11.731386068380056,
        "loglikelihood": 0.0
      }, {
        "expression": "(λ (λ (λ (nand (nand (nand $0 $2) $1) (nand $2 $2)))))",
        "logprior": -11.731386068380056,
        "loglikelihood": 0.0
      }]
    }, {
      "task_tp": "bool → bool → bool",
      "solutions": [{
        "expression": "(λ (λ (nand (nand $0 $0) (nand $1 $1))))",
        "logprior": -7.6246189861593989,
        "loglikelihood": 0.0
      }, {
        "expression": "(λ (λ (nand (nand $1 $1) (nand $0 $0))))",
        "logprior": -7.6246189861593989,
        "loglikelihood": 0.0
      }, {
        "expression": "(λ (λ (nand (nand (nand $0 $0) $1) (nand $0 $0))))",
        "logprior": -9.704060527839234,
        "loglikelihood": 0.0
      }, {
        "expression": "(λ (λ (nand (nand (nand $0 $1) $0) (nand $1 $1))))",
        "logprior": -9.704060527839234,
        "loglikelihood": 0.0
      }, {
        "expression": "(λ (λ (nand (nand (nand $0 $1) $1) (nand $0 $0))))",
        "logprior": -9.704060527839234,
        "loglikelihood": 0.0
      }, {
        "expression": "(λ (λ (nand (nand (nand $1 $0) $0) (nand $1 $1))))",
        "logprior": -9.704060527839234,
        "loglikelihood": 0.0
      }, {
        "expression": "(λ (λ (nand (nand (nand $1 $0) $1) (nand $0 $0))))",
        "logprior": -9.704060527839234,
        "loglikelihood": 0.0
      }, {
        "expression": "(λ (λ (nand (nand (nand $1 $1) $0) (nand $1 $1))))",
        "logprior": -9.704060527839234,
        "loglikelihood": 0.0
      }, {
        "expression": "(λ (λ (nand (nand $0 (nand $0 $1)) (nand $1 $1))))",
        "logprior": -9.704060527839234,
        "loglikelihood": 0.0
      }, {
        "expression": "(λ (λ (nand (nand $0 (nand $1 $0)) (nand $1 $1))))",
        "logprior": -9.704060527839234,
        "loglikelihood": 0.0
      }]
    }, {
      "task_tp": "bool → bool → bool",
      "solutions": [{
        "expression": "(λ (λ (nand (nand $0 $1) (nand $0 $1))))",
        "logprior": -7.6246189861593989,
        "loglikelihood": 0.0
      }, {
        "expression": "(λ (λ (nand (nand $0 $1) (nand $1 $0))))",
        "logprior": -7.6246189861593989,
        "loglikelihood": 0.0
      }, {
        "expression": "(λ (λ (nand (nand $1 $0) (nand $0 $1))))",
        "logprior": -7.6246189861593989,
        "loglikelihood": 0.0
      }, {
        "expression": "(λ (λ (nand (nand $1 $0) (nand $1 $0))))",
        "logprior": -7.6246189861593989,
        "loglikelihood": 0.0
      }, {
        "expression": "(λ (λ (nand (nand (nand $0 $0) $0) (nand $0 $1))))",
        "logprior": -9.704060527839234,
        "loglikelihood": 0.0
      }, {
        "expression": "(λ (λ (nand (nand (nand $0 $0) $0) (nand $1 $0))))",
        "logprior": -9.704060527839234,
        "loglikelihood": 0.0
      }, {
        "expression": "(λ (λ (nand (nand (nand $1 $1) $1) (nand $0 $1))))",
        "logprior": -9.704060527839234,
        "loglikelihood": 0.0
      }, {
        "expression": "(λ (λ (nand (nand (nand $1 $1) $1) (nand $1 $0))))",
        "logprior": -9.704060527839234,
        "loglikelihood": 0.0
      }, {
        "expression": "(λ (λ (nand (nand $0 (nand $0 $0)) (nand $0 $1))))",
        "logprior": -9.704060527839234,
        "loglikelihood": 0.0
      }, {
        "expression": "(λ (λ (nand (nand $0 (nand $0 $0)) (nand $1 $0))))",
        "logprior": -9.704060527839234,
        "loglikelihood": 0.0
      }]
    }, {
      "task_tp": "bool → bool",
      "solutions": [{
        "expression": "(λ (nand $0 $0))",
        "logprior": -2.0794415416798359,
        "loglikelihood": 0.0
      }, {
        "expression": "(λ (nand (nand (nand $0 $0) $0) $0))",
        "logprior": -4.852030263919617,
        "loglikelihood": 0.0
      }, {
        "expression": "(λ (nand (nand $0 (nand $0 $0)) $0))",
        "logprior": -4.852030263919617,
        "loglikelihood": 0.0
      }, {
        "expression": "(λ (nand $0 (nand (nand $0 $0) $0)))",
        "logprior": -4.852030263919617,
        "loglikelihood": 0.0
      }, {
        "expression": "(λ (nand $0 (nand $0 (nand $0 $0))))",
        "logprior": -4.852030263919617,
        "loglikelihood": 0.0
      }, {
        "expression": "(λ (nand (nand (nand $0 $0) (nand $0 $0)) $0))",
        "logprior": -6.238324625039508,
        "loglikelihood": 0.0
      }, {
        "expression": "(λ (nand $0 (nand (nand $0 $0) (nand $0 $0))))",
        "logprior": -6.238324625039508,
        "loglikelihood": 0.0
      }, {
        "expression": "(λ (nand (nand (nand (nand (nand $0 $0) $0) $0) $0) $0))",
        "logprior": -7.6246189861593989,
        "loglikelihood": 0.0
      }, {
        "expression": "(λ (nand (nand (nand (nand $0 (nand $0 $0)) $0) $0) $0))",
        "logprior": -7.6246189861593989,
        "loglikelihood": 0.0
      }, {
        "expression": "(λ (nand (nand (nand (nand $0 $0) $0) (nand $0 $0)) $0))",
        "logprior": -7.6246189861593989,
        "loglikelihood": 0.0
      }]
    }, {
      "task_tp": "bool → bool → bool → bool",
      "solutions": [{
        "expression": "(λ (λ (λ (nand (nand $0 $0) (nand $2 $2)))))",
        "logprior": -9.246479418592056,
        "loglikelihood": 0.0
      }, {
        "expression": "(λ (λ (λ (nand (nand $2 $2) (nand $0 $0)))))",
        "logprior": -9.246479418592056,
        "loglikelihood": 0.0
      }, {
        "expression": "(λ (λ (λ (nand (nand (nand $0 $0) $2) (nand $0 $0)))))",
        "logprior": -11.731386068380056,
        "loglikelihood": 0.0
      }, {
        "expression": "(λ (λ (λ (nand (nand (nand $0 $1) $2) (nand $0 $0)))))",
        "logprior": -11.731386068380056,
        "loglikelihood": 0.0
      }, {
        "expression": "(λ (λ (λ (nand (nand (nand $0 $2) $0) (nand $2 $2)))))",
        "logprior": -11.731386068380056,
        "loglikelihood": 0.0
      }, {
        "expression": "(λ (λ (λ (nand (nand (nand $0 $2) $2) (nand $0 $0)))))",
        "logprior": -11.731386068380056,
        "loglikelihood": 0.0
      }]
    }, {
      "task_tp": "bool → bool → bool → bool",
      "solutions": [{
        "expression": "(λ (λ (λ (nand (nand (nand $0 $0) $2) (nand $1 $2)))))",
        "logprior": -11.731386068380056,
        "loglikelihood": 0.0
      }, {
        "expression": "(λ (λ (λ (nand (nand (nand $0 $0) $2) (nand $2 $1)))))",
        "logprior": -11.731386068380056,
        "loglikelihood": 0.0
      }, {
        "expression": "(λ (λ (λ (nand (nand (nand $0 $2) $2) (nand $1 $2)))))",
        "logprior": -11.731386068380056,
        "loglikelihood": 0.0
      }, {
        "expression": "(λ (λ (λ (nand (nand (nand $0 $2) $2) (nand $2 $1)))))",
        "logprior": -11.731386068380056,
        "loglikelihood": 0.0
      }]
    }, {
      "task_tp": "bool → bool → bool → bool → bool",
      "solutions": [{
        "expression": "(λ (λ (λ (λ (nand (nand $0 $1) (nand $1 $2))))))",
        "logprior": -10.39720770839918,
        "loglikelihood": 0.0
      }, {
        "expression": "(λ (λ (λ (λ (nand (nand $0 $1) (nand $2 $1))))))",
        "logprior": -10.39720770839918,
        "loglikelihood": 0.0
      }, {
        "expression": "(λ (λ (λ (λ (nand (nand $1 $0) (nand $1 $2))))))",
        "logprior": -10.39720770839918,
        "loglikelihood": 0.0
      }, {
        "expression": "(λ (λ (λ (λ (nand (nand $1 $0) (nand $2 $1))))))",
        "logprior": -10.39720770839918,
        "loglikelihood": 0.0
      }, {
        "expression": "(λ (λ (λ (λ (nand (nand $1 $2) (nand $0 $1))))))",
        "logprior": -10.39720770839918,
        "loglikelihood": 0.0
      }, {
        "expression": "(λ (λ (λ (λ (nand (nand $1 $2) (nand $1 $0))))))",
        "logprior": -10.39720770839918,
        "loglikelihood": 0.0
      }, {
        "expression": "(λ (λ (λ (λ (nand (nand $2 $1) (nand $0 $1))))))",
        "logprior": -10.39720770839918,
        "loglikelihood": 0.0
      }, {
        "expression": "(λ (λ (λ (λ (nand (nand $2 $1) (nand $1 $0))))))",
        "logprior": -10.39720770839918,
        "loglikelihood": 0.0
      }]
    }, {
      "task_tp": "bool → bool → bool → bool",
      "solutions": [{
        "expression": "(λ (λ (λ (nand (nand $0 $1) (nand $0 $2)))))",
        "logprior": -9.246479418592056,
        "loglikelihood": 0.0
      }, {
        "expression": "(λ (λ (λ (nand (nand $0 $1) (nand $2 $0)))))",
        "logprior": -9.246479418592056,
        "loglikelihood": 0.0
      }, {
        "expression": "(λ (λ (λ (nand (nand $0 $2) (nand $0 $1)))))",
        "logprior": -9.246479418592056,
        "loglikelihood": 0.0
      }, {
        "expression": "(λ (λ (λ (nand (nand $0 $2) (nand $1 $0)))))",
        "logprior": -9.246479418592056,
        "loglikelihood": 0.0
      }, {
        "expression": "(λ (λ (λ (nand (nand $1 $0) (nand $0 $2)))))",
        "logprior": -9.246479418592056,
        "loglikelihood": 0.0
      }, {
        "expression": "(λ (λ (λ (nand (nand $1 $0) (nand $2 $0)))))",
        "logprior": -9.246479418592056,
        "loglikelihood": 0.0
      }, {
        "expression": "(λ (λ (λ (nand (nand $2 $0) (nand $0 $1)))))",
        "logprior": -9.246479418592056,
        "loglikelihood": 0.0
      }, {
        "expression": "(λ (λ (λ (nand (nand $2 $0) (nand $1 $0)))))",
        "logprior": -9.246479418592056,
        "loglikelihood": 0.0
      }]
    }, {
      "task_tp": "bool → bool → bool",
      "solutions": [{
        "expression": "(λ (λ (nand (nand $0 $1) (nand $0 $1))))",
        "logprior": -7.6246189861593989,
        "loglikelihood": 0.0
      }, {
        "expression": "(λ (λ (nand (nand $0 $1) (nand $1 $0))))",
        "logprior": -7.6246189861593989,
        "loglikelihood": 0.0
      }, {
        "expression": "(λ (λ (nand (nand $1 $0) (nand $0 $1))))",
        "logprior": -7.6246189861593989,
        "loglikelihood": 0.0
      }, {
        "expression": "(λ (λ (nand (nand $1 $0) (nand $1 $0))))",
        "logprior": -7.6246189861593989,
        "loglikelihood": 0.0
      }, {
        "expression": "(λ (λ (nand (nand (nand $0 $0) $0) (nand $0 $1))))",
        "logprior": -9.704060527839234,
        "loglikelihood": 0.0
      }, {
        "expression": "(λ (λ (nand (nand (nand $0 $0) $0) (nand $1 $0))))",
        "logprior": -9.704060527839234,
        "loglikelihood": 0.0
      }, {
        "expression": "(λ (λ (nand (nand (nand $1 $1) $1) (nand $0 $1))))",
        "logprior": -9.704060527839234,
        "loglikelihood": 0.0
      }, {
        "expression": "(λ (λ (nand (nand (nand $1 $1) $1) (nand $1 $0))))",
        "logprior": -9.704060527839234,
        "loglikelihood": 0.0
      }, {
        "expression": "(λ (λ (nand (nand $0 (nand $0 $0)) (nand $0 $1))))",
        "logprior": -9.704060527839234,
        "loglikelihood": 0.0
      }, {
        "expression": "(λ (λ (nand (nand $0 (nand $0 $0)) (nand $1 $0))))",
        "logprior": -9.704060527839234,
        "loglikelihood": 0.0
      }]
    }, {
      "task_tp": "bool → bool",
      "solutions": [{
        "expression": "(λ $0)",
        "logprior": -0.6931471805599453,
        "loglikelihood": 0.0
      }, {
        "expression": "(λ (nand (nand $0 $0) (nand $0 $0)))",
        "logprior": -4.852030263919617,
        "loglikelihood": 0.0
      }, {
        "expression": "(λ (nand (nand (nand $0 $0) $0) (nand $0 $0)))",
        "logprior": -6.238324625039508,
        "loglikelihood": 0.0
      }, {
        "expression": "(λ (nand (nand $0 (nand $0 $0)) (nand $0 $0)))",
        "logprior": -6.238324625039508,
        "loglikelihood": 0.0
      }, {
        "expression": "(λ (nand (nand $0 $0) (nand (nand $0 $0) $0)))",
        "logprior": -6.238324625039508,
        "loglikelihood": 0.0
      }, {
        "expression": "(λ (nand (nand $0 $0) (nand $0 (nand $0 $0))))",
        "logprior": -6.238324625039508,
        "loglikelihood": 0.0
      }, {
        "expression": "(λ (nand (nand (nand (nand $0 $0) $0) $0) (nand $0 $0)))",
        "logprior": -7.624618986159398,
        "loglikelihood": 0.0
      }, {
        "expression": "(λ (nand (nand (nand $0 (nand $0 $0)) $0) (nand $0 $0)))",
        "logprior": -7.624618986159398,
        "loglikelihood": 0.0
      }, {
        "expression": "(λ (nand (nand $0 (nand (nand $0 $0) $0)) (nand $0 $0)))",
        "logprior": -7.624618986159398,
        "loglikelihood": 0.0
      }, {
        "expression": "(λ (nand (nand $0 (nand $0 (nand $0 $0))) (nand $0 $0)))",
        "logprior": -7.624618986159398,
        "loglikelihood": 0.0
      }]
    }, {
      "task_tp": "bool → bool → bool",
      "solutions": [{
        "expression": "(λ (λ (nand (nand $0 $0) (nand $1 $1))))",
        "logprior": -7.6246189861593989,
        "loglikelihood": 0.0
      }, {
        "expression": "(λ (λ (nand (nand $1 $1) (nand $0 $0))))",
        "logprior": -7.6246189861593989,
        "loglikelihood": 0.0
      }, {
        "expression": "(λ (λ (nand (nand (nand $0 $0) $1) (nand $0 $0))))",
        "logprior": -9.704060527839234,
        "loglikelihood": 0.0
      }, {
        "expression": "(λ (λ (nand (nand (nand $0 $1) $0) (nand $1 $1))))",
        "logprior": -9.704060527839234,
        "loglikelihood": 0.0
      }, {
        "expression": "(λ (λ (nand (nand (nand $0 $1) $1) (nand $0 $0))))",
        "logprior": -9.704060527839234,
        "loglikelihood": 0.0
      }, {
        "expression": "(λ (λ (nand (nand (nand $1 $0) $0) (nand $1 $1))))",
        "logprior": -9.704060527839234,
        "loglikelihood": 0.0
      }, {
        "expression": "(λ (λ (nand (nand (nand $1 $0) $1) (nand $0 $0))))",
        "logprior": -9.704060527839234,
        "loglikelihood": 0.0
      }, {
        "expression": "(λ (λ (nand (nand (nand $1 $1) $0) (nand $1 $1))))",
        "logprior": -9.704060527839234,
        "loglikelihood": 0.0
      }, {
        "expression": "(λ (λ (nand (nand $0 (nand $0 $1)) (nand $1 $1))))",
        "logprior": -9.704060527839234,
        "loglikelihood": 0.0
      }, {
        "expression": "(λ (λ (nand (nand $0 (nand $1 $0)) (nand $1 $1))))",
        "logprior": -9.704060527839234,
        "loglikelihood": 0.0
      }]
    }, {
      "task_tp": "bool → bool",
      "solutions": [{
        "expression": "(λ (nand (nand (nand $0 $0) $0) (nand (nand $0 $0) $0)))",
        "logprior": -7.6246189861593989,
        "loglikelihood": 0.0
      }, {
        "expression": "(λ (nand (nand (nand $0 $0) $0) (nand $0 (nand $0 $0))))",
        "logprior": -7.6246189861593989,
        "loglikelihood": 0.0
      }, {
        "expression": "(λ (nand (nand $0 (nand $0 $0)) (nand (nand $0 $0) $0)))",
        "logprior": -7.6246189861593989,
        "loglikelihood": 0.0
      }, {
        "expression": "(λ (nand (nand $0 (nand $0 $0)) (nand $0 (nand $0 $0))))",
        "logprior": -7.6246189861593989,
        "loglikelihood": 0.0
      }, {
        "expression": "(λ (nand (nand (nand (nand (nand $0 $0) $0) $0) $0) (nand (nand $0 $0) $0)))",
        "logprior": -10.39720770839918,
        "loglikelihood": 0.0
      }, {
        "expression": "(λ (nand (nand (nand (nand (nand $0 $0) $0) $0) $0) (nand $0 (nand $0 $0))))",
        "logprior": -10.39720770839918,
        "loglikelihood": 0.0
      }, {
        "expression": "(λ (nand (nand (nand (nand $0 (nand $0 $0)) $0) $0) (nand (nand $0 $0) $0)))",
        "logprior": -10.39720770839918,
        "loglikelihood": 0.0
      }, {
        "expression": "(λ (nand (nand (nand (nand $0 (nand $0 $0)) $0) $0) (nand $0 (nand $0 $0))))",
        "logprior": -10.39720770839918,
        "loglikelihood": 0.0
      }, {
        "expression": "(λ (nand (nand (nand $0 (nand (nand $0 $0) $0)) $0) (nand (nand $0 $0) $0)))",
        "logprior": -10.39720770839918,
        "loglikelihood": 0.0
      }, {
        "expression": "(λ (nand (nand (nand $0 (nand (nand $0 $0) $0)) $0) (nand $0 (nand $0 $0))))",
        "logprior": -10.39720770839918,
        "loglikelihood": 0.0
      }]
    }, {
      "task_tp": "bool → bool → bool → bool → bool",
      "solutions": [{
        "expression": "(λ (λ (λ (λ (nand (nand $0 $1) (nand $3 $3))))))",
        "logprior": -10.39720770839918,
        "loglikelihood": 0.0
      }, {
        "expression": "(λ (λ (λ (λ (nand (nand $1 $0) (nand $3 $3))))))",
        "logprior": -10.39720770839918,
        "loglikelihood": 0.0
      }, {
        "expression": "(λ (λ (λ (λ (nand (nand $3 $3) (nand $0 $1))))))",
        "logprior": -10.39720770839918,
        "loglikelihood": 0.0
      }, {
        "expression": "(λ (λ (λ (λ (nand (nand $3 $3) (nand $1 $0))))))",
        "logprior": -10.39720770839918,
        "loglikelihood": 0.0
      }]
    }, {
      "task_tp": "bool → bool → bool → bool",
      "solutions": [{
        "expression": "(λ (λ (λ (nand (nand (nand $0 $0) $2) (nand $1 $1)))))",
        "logprior": -11.731386068380056,
        "loglikelihood": 0.0
      }, {
        "expression": "(λ (λ (λ (nand (nand (nand $0 $2) $2) (nand $1 $1)))))",
        "logprior": -11.731386068380056,
        "loglikelihood": 0.0
      }]
    }, {
      "task_tp": "bool → bool → bool",
      "solutions": [{
        "expression": "(λ (λ (nand (nand $0 $0) (nand $1 $1))))",
        "logprior": -7.6246189861593989,
        "loglikelihood": 0.0
      }, {
        "expression": "(λ (λ (nand (nand $1 $1) (nand $0 $0))))",
        "logprior": -7.6246189861593989,
        "loglikelihood": 0.0
      }, {
        "expression": "(λ (λ (nand (nand (nand $0 $0) $1) (nand $0 $0))))",
        "logprior": -9.704060527839234,
        "loglikelihood": 0.0
      }, {
        "expression": "(λ (λ (nand (nand (nand $0 $1) $0) (nand $1 $1))))",
        "logprior": -9.704060527839234,
        "loglikelihood": 0.0
      }, {
        "expression": "(λ (λ (nand (nand (nand $0 $1) $1) (nand $0 $0))))",
        "logprior": -9.704060527839234,
        "loglikelihood": 0.0
      }, {
        "expression": "(λ (λ (nand (nand (nand $1 $0) $0) (nand $1 $1))))",
        "logprior": -9.704060527839234,
        "loglikelihood": 0.0
      }, {
        "expression": "(λ (λ (nand (nand (nand $1 $0) $1) (nand $0 $0))))",
        "logprior": -9.704060527839234,
        "loglikelihood": 0.0
      }, {
        "expression": "(λ (λ (nand (nand (nand $1 $1) $0) (nand $1 $1))))",
        "logprior": -9.704060527839234,
        "loglikelihood": 0.0
      }, {
        "expression": "(λ (λ (nand (nand $0 (nand $0 $1)) (nand $1 $1))))",
        "logprior": -9.704060527839234,
        "loglikelihood": 0.0
      }, {
        "expression": "(λ (λ (nand (nand $0 (nand $1 $0)) (nand $1 $1))))",
        "logprior": -9.704060527839234,
        "loglikelihood": 0.0
      }]
    }, {
      "task_tp": "bool → bool",
      "solutions": [{
        "expression": "(λ (nand (nand $0 $0) $0))",
        "logprior": -3.4657359027997267,
        "loglikelihood": 0.0
      }, {
        "expression": "(λ (nand $0 (nand $0 $0)))",
        "logprior": -3.4657359027997267,
        "loglikelihood": 0.0
      }, {
        "expression": "(λ (nand (nand (nand (nand $0 $0) $0) $0) $0))",
        "logprior": -6.238324625039508,
        "loglikelihood": 0.0
      }, {
        "expression": "(λ (nand (nand (nand $0 (nand $0 $0)) $0) $0))",
        "logprior": -6.238324625039508,
        "loglikelihood": 0.0
      }, {
        "expression": "(λ (nand (nand $0 (nand (nand $0 $0) $0)) $0))",
        "logprior": -6.238324625039508,
        "loglikelihood": 0.0
      }, {
        "expression": "(λ (nand (nand $0 (nand $0 (nand $0 $0))) $0))",
        "logprior": -6.238324625039508,
        "loglikelihood": 0.0
      }, {
        "expression": "(λ (nand $0 (nand (nand (nand $0 $0) $0) $0)))",
        "logprior": -6.238324625039508,
        "loglikelihood": 0.0
      }, {
        "expression": "(λ (nand $0 (nand (nand $0 (nand $0 $0)) $0)))",
        "logprior": -6.238324625039508,
        "loglikelihood": 0.0
      }, {
        "expression": "(λ (nand $0 (nand $0 (nand (nand $0 $0) $0))))",
        "logprior": -6.238324625039508,
        "loglikelihood": 0.0
      }, {
        "expression": "(λ (nand $0 (nand $0 (nand $0 (nand $0 $0)))))",
        "logprior": -6.238324625039508,
        "loglikelihood": 0.0
      }]
    }, {
      "task_tp": "bool → bool → bool → bool",
      "solutions": [{
        "expression": "(λ (λ (λ (nand (nand (nand $0 $0) $2) (nand $1 $2)))))",
        "logprior": -11.731386068380056,
        "loglikelihood": 0.0
      }, {
        "expression": "(λ (λ (λ (nand (nand (nand $0 $0) $2) (nand $2 $1)))))",
        "logprior": -11.731386068380056,
        "loglikelihood": 0.0
      }, {
        "expression": "(λ (λ (λ (nand (nand (nand $0 $2) $2) (nand $1 $2)))))",
        "logprior": -11.731386068380056,
        "loglikelihood": 0.0
      }, {
        "expression": "(λ (λ (λ (nand (nand (nand $0 $2) $2) (nand $2 $1)))))",
        "logprior": -11.731386068380056,
        "loglikelihood": 0.0
      }]
    }, {
      "task_tp": "bool → bool → bool",
      "solutions": [{
        "expression": "(λ (λ (nand (nand $0 $1) (nand $0 $1))))",
        "logprior": -7.6246189861593989,
        "loglikelihood": 0.0
      }, {
        "expression": "(λ (λ (nand (nand $0 $1) (nand $1 $0))))",
        "logprior": -7.6246189861593989,
        "loglikelihood": 0.0
      }, {
        "expression": "(λ (λ (nand (nand $1 $0) (nand $0 $1))))",
        "logprior": -7.6246189861593989,
        "loglikelihood": 0.0
      }, {
        "expression": "(λ (λ (nand (nand $1 $0) (nand $1 $0))))",
        "logprior": -7.6246189861593989,
        "loglikelihood": 0.0
      }, {
        "expression": "(λ (λ (nand (nand (nand $0 $0) $0) (nand $0 $1))))",
        "logprior": -9.704060527839234,
        "loglikelihood": 0.0
      }, {
        "expression": "(λ (λ (nand (nand (nand $0 $0) $0) (nand $1 $0))))",
        "logprior": -9.704060527839234,
        "loglikelihood": 0.0
      }, {
        "expression": "(λ (λ (nand (nand (nand $1 $1) $1) (nand $0 $1))))",
        "logprior": -9.704060527839234,
        "loglikelihood": 0.0
      }, {
        "expression": "(λ (λ (nand (nand (nand $1 $1) $1) (nand $1 $0))))",
        "logprior": -9.704060527839234,
        "loglikelihood": 0.0
      }, {
        "expression": "(λ (λ (nand (nand $0 (nand $0 $0)) (nand $0 $1))))",
        "logprior": -9.704060527839234,
        "loglikelihood": 0.0
      }, {
        "expression": "(λ (λ (nand (nand $0 (nand $0 $0)) (nand $1 $0))))",
        "logprior": -9.704060527839234,
        "loglikelihood": 0.0
      }]
    }, {
      "task_tp": "bool → bool → bool",
      "solutions": [{
        "expression": "(λ (λ $1))",
        "logprior": -1.3862943611198906,
        "loglikelihood": 0.0
      }, {
        "expression": "(λ (λ (nand (nand $0 $1) (nand $1 $1))))",
        "logprior": -7.6246189861593989,
        "loglikelihood": 0.0
      }, {
        "expression": "(λ (λ (nand (nand $1 $0) (nand $1 $1))))",
        "logprior": -7.6246189861593989,
        "loglikelihood": 0.0
      }, {
        "expression": "(λ (λ (nand (nand $1 $1) (nand $0 $1))))",
        "logprior": -7.6246189861593989,
        "loglikelihood": 0.0
      }, {
        "expression": "(λ (λ (nand (nand $1 $1) (nand $1 $0))))",
        "logprior": -7.6246189861593989,
        "loglikelihood": 0.0
      }, {
        "expression": "(λ (λ (nand (nand $1 $1) (nand $1 $1))))",
        "logprior": -7.6246189861593989,
        "loglikelihood": 0.0
      }, {
        "expression": "(λ (λ (nand (nand (nand $0 $0) $0) (nand $1 $1))))",
        "logprior": -9.704060527839234,
        "loglikelihood": 0.0
      }, {
        "expression": "(λ (λ (nand (nand (nand $0 $0) $1) (nand $0 $1))))",
        "logprior": -9.704060527839234,
        "loglikelihood": 0.0
      }, {
        "expression": "(λ (λ (nand (nand (nand $0 $0) $1) (nand $1 $0))))",
        "logprior": -9.704060527839234,
        "loglikelihood": 0.0
      }, {
        "expression": "(λ (λ (nand (nand (nand $0 $0) $1) (nand $1 $1))))",
        "logprior": -9.704060527839234,
        "loglikelihood": 0.0
      }]
    }
  ]
}
