# Supplementary material
Source: ML conference proceedings conference paper supplement (https://proceedings.neurips.cc/paper_files/paper/2022/hash/0113ef4642264adc2e6924a3cbbdf532-Abstract.html)
Supplement: Supplementary file 1 [file 0113ef4642264adc2e6924a3cbbdf532-Supplemental-Conference.zip › neurips_supplementary_cameraready/ec-master/rust_compressor/Makefile]

default: rust_compressor

rust_compressor: Cargo.toml Cargo.lock src/*.rs
	cargo build --release
	mv target/release/rust_compressor ./
	strip rust_compressor
