# Supplementary material
Source: ML conference proceedings conference paper supplement (https://proceedings.neurips.cc/paper_files/paper/2022/hash/0113ef4642264adc2e6924a3cbbdf532-Abstract.html)
Supplement: Supplementary file 1 [file 0113ef4642264adc2e6924a3cbbdf532-Supplemental-Conference.zip › neurips_supplementary_cameraready/ec-master/solvers/cache_types.ml]

[@@@ocaml.warning "-27-30-39"]


type tower_cash_block = {
  x10 : int32;
  w10 : int32;
  h10 : int32;
}

type tower_cash_entry = {
  plan : tower_cash_block list;
  height : float;
  stability : float;
  area : float;
  length : float;
  overpass : float;
  staircase : float;
}

type tower_cash = {
  entries : tower_cash_entry list;
} [@@unboxed]

let rec default_tower_cash_block 
  ?x10:((x10:int32) = 0l)
  ?w10:((w10:int32) = 0l)
  ?h10:((h10:int32) = 0l)
  () : tower_cash_block  = {
  x10;
  w10;
  h10;
}

let rec default_tower_cash_entry 
  ?plan:((plan:tower_cash_block list) = [])
  ?height:((height:float) = 0.)
  ?stability:((stability:float) = 0.)
  ?area:((area:float) = 0.)
  ?length:((length:float) = 0.)
  ?overpass:((overpass:float) = 0.)
  ?staircase:((staircase:float) = 0.)
  () : tower_cash_entry  = {
  plan;
  height;
  stability;
  area;
  length;
  overpass;
  staircase;
}

let rec default_tower_cash 
  ?entries:((entries:tower_cash_entry list) = [])
  () : tower_cash  = {
  entries;
}
