# Supplementary material
Source: ML conference proceedings conference paper supplement (https://proceedings.neurips.cc/paper_files/paper/2022/hash/0113ef4642264adc2e6924a3cbbdf532-Abstract.html)
Supplement: Supplementary file 1 [file 0113ef4642264adc2e6924a3cbbdf532-Supplemental-Conference.zip › neurips_supplementary_cameraready/ec-master/solvers/grammar.ml]

open Core

open Utils
open Type
open Program
open FastType


type grammar = {
  logVariable: float;
  library: (program*tp*float*(tContext -> tp -> tContext*(tp list))) list;
  continuation_type : tp option;
}

let primitive_grammar ?continuation_type:(continuation_type=None) primitives =
  {library = List.map primitives ~f:(fun p -> match p with
       |Primitive(t,_,_) -> (p,t, 0.0 -. (log (float_of_int (List.length primitives))),
                            compile_unifier t)
       |_ -> raise (Failure "primitive_grammar: not primitive"));
   logVariable = log 0.5;
   continuation_type;
  }

exception DuplicatePrimitive;;

let uniform_grammar ?continuation_type:(continuation_type=None) primitives =
  if List.length primitives = List.length (List.dedup_and_sort
                                             ~compare:compare_program(* (fun p1 p2 -> String.compare (string_of_program p1) *)
                                                      (*     (string_of_program p2)) *) primitives) then
  {library = List.map primitives ~f:(fun p -> match p with
       |Primitive(t,_,_) | Invented(t,_) ->
         (p,t, 0.0 -. (log (float_of_int (List.length primitives))),
          compile_unifier t)
       |_ -> raise (Failure "primitive_grammar: not primitive"));
   logVariable = log 0.5;
   continuation_type
  }
  else raise DuplicatePrimitive

let strip_grammar {logVariable;continuation_type;library;} =
  {logVariable;
   continuation_type;
   library=library |> List.map ~f:(fun (p,t,l,u) -> (strip_primitives p,t,l,u))}

let grammar_primitives g =
   g.library |> List.map ~f:(fun (p,_,_,_) -> p)

let string_of_grammar g =
  (match g.continuation_type with
   | None -> ""
   | Some(ct) -> Printf.sprintf "continuation : %s\n" (string_of_type ct))^
  string_of_float g.logVariable ^ "\tt0\t$_\n" ^
  join ~separator:"\n" (g.library |> List.map ~f:(fun (p,t,l,_) -> Float.to_string l^"\t"^(string_of_type t)^"\t"^(string_of_program p)))

let grammar_log_weight g p =
  if is_index p then g.logVariable else
    match
      g.library |> List.filter_map ~f:(fun (p',_,l,_) -> if program_equal p p' then Some(l) else None)
    with
    | [l] -> l
    | _ :: _ -> raise (Failure (Printf.sprintf "Grammar contains duplicate primitive %s\n%s\n"
                               (string_of_program p) (string_of_grammar g)))
    | [] -> raise (Failure (Printf.sprintf "Could not find the following primitive:\n\t%s\n\tinside the DSL:\n%s\n"
                          (string_of_program p) (string_of_grammar g)))

let unifying_expressions g environment request context : (program*tp list*tContext*float) list =
  (* given a grammar environment requested type and typing context,
     what are all of the possible leaves that we might use?
     These could be productions in the grammar or they could be variables. 
     Yields a sequence of:
     (leaf, argument types, context with leaf return type unified with requested type, normalized log likelihood)
  *)

  let variable_candidates =
    environment |> List.mapi ~f:(fun j t -> (Index(j),t,g.logVariable)) |>
    List.filter_map ~f:(fun (p,t,ll) ->
        let (context, t) = applyContext context t in
        let return = return_of_type t in
        if might_unify return request
        then
          try
            let context = unify context return request in
            let (context,t) = applyContext context t in            
            Some((p,arguments_of_type t,context,ll))
          with UnificationFailure -> None
        else None)
  in
  let variable_candidates = match (variable_candidates, g.continuation_type) with
      | (_ :: _, Some(t)) when t = request -> 
        let terminal_indices = List.filter_map variable_candidates ~f:(fun (p,t,_,_) ->
            if t = [] then Some(get_index_value p) else None) in
        if terminal_indices = [] then variable_candidates else
          let smallest_terminal_index = fold1 min terminal_indices in
          variable_candidates |> List.filter ~f:(fun (p,t,_,_) ->
              let okay = not (is_index p) ||
                         not (t = []) ||
                         get_index_value p = smallest_terminal_index in
              (* if not okay then *)
              (*   Printf.eprintf "Pruning imperative index %s with request %s; environment=%s; smallest=%i\n" *)
              (*     (string_of_program p) *)
              (*     (string_of_type request) *)
              (*     (environment |> List.map ~f:string_of_type |> join ~separator:";") *)
              (*     smallest_terminal_index; *)
              okay)
      | _ -> variable_candidates
  in
  let nv = List.length variable_candidates |> Float.of_int |> log in
  let variable_candidates = variable_candidates |> List.map ~f:(fun (p,t,k,ll) -> (p,t,k,ll-.nv)) in

  let grammar_candidates = 
    g.library |> List.filter_map ~f:(fun (p,t,ll,u) ->
        try
          let return_type = return_of_type t in
          if not (might_unify return_type request)
          then None
          else
            let (context,arguments) = u context request in
            Some(p, arguments, context, ll)
        with UnificationFailure -> None)
  in

  let candidates = variable_candidates@grammar_candidates in
  let z = List.map ~f:(fun (_,_,_,ll) -> ll) candidates |> lse_list in
  let candidates = List.map ~f:(fun (p,t,k,ll) -> (p,t,k,ll-.z)) candidates in
  candidates


type likelihood_summary = {
  normalizer_frequency : ((program list),float) Hashtbl.t;
  use_frequency : (program,float) Hashtbl.t;
  mutable likelihood_constant : float;
}

let show_summary s =
  join ~separator:"\n"
    ([Printf.sprintf "{likelihood_constant = %f;" s.likelihood_constant] @
     (Hashtbl.to_alist s.use_frequency |> List.map ~f:(fun (p,f) ->
          Printf.sprintf "use_frequency[%s] = %f;"
            (string_of_program p) f)) @
     (Hashtbl.to_alist s.normalizer_frequency |> List.map ~f:(fun (n,f) ->
          let n = n |> List.map ~f:string_of_program |> join ~separator:"," in
          Printf.sprintf "normalizer_frequency[%s] = %f;" n f)) @
     ["}"])
                        

let empty_likelihood_summary() = {
  normalizer_frequency = Hashtbl.Poly.create();
  use_frequency = Hashtbl.Poly.create();
  likelihood_constant = 0.;}

let mix_summaries weighted_summaries =
  let s = empty_likelihood_summary() in
  weighted_summaries |> List.iter ~f:(fun (w,s') ->
      Hashtbl.iteri s'.use_frequency ~f:(fun ~key ~data ->
          Hashtbl.update s.use_frequency key ~f:(function
              | None -> data*.w
              | Some(k) -> k+.data*.w));
      Hashtbl.iteri s'.normalizer_frequency ~f:(fun ~key ~data ->
          Hashtbl.update s.normalizer_frequency key ~f:(function
              | None -> data*.w
              | Some(k) -> k+.data*.w)));
  s

let record_likelihood_event likelihood_summary actual possibles =
  let constant = if is_index actual then
      -. (possibles |> List.filter ~f:is_index |> List.length |> Float.of_int |> log)
    else 0. in

  let actual = if is_index actual then Index(0) else actual in
  let variable_possible = possibles |> List.exists ~f:is_index in
  let possibles = possibles |> List.filter ~f:(compose not is_index) in
  let possibles = if variable_possible then Index(0) :: possibles else possibles in
  let possibles = possibles |> List.dedup_and_sort ~compare:compare_program in

  likelihood_summary.likelihood_constant <- likelihood_summary.likelihood_constant +. constant;
  Hashtbl.set likelihood_summary.use_frequency ~key:actual
    ~data:(match Hashtbl.find likelihood_summary.use_frequency actual with
        | None -> 1. | Some(f) -> f+.1.);
  Hashtbl.set likelihood_summary.normalizer_frequency ~key:possibles
    ~data:(match Hashtbl.find likelihood_summary.normalizer_frequency possibles with
        | None -> 1. | Some(f) -> f+.1.)
;;

let summary_likelihood (g : grammar) (s : likelihood_summary) =
  s.likelihood_constant +.
  (Hashtbl.fold s.use_frequency ~init:0.
     ~f:(fun ~key ~data a ->
         a+.data*.(grammar_log_weight g key))) -.
  (Hashtbl.fold s.normalizer_frequency ~init:0.
     ~f:(fun ~key ~data a ->
         a+.data*.(key |> List.map ~f:(grammar_log_weight g) |> lse_list)))

let make_likelihood_summary g request expression =
  let rec walk_application_tree tree =
    match tree with
    | Apply(f,x) -> walk_application_tree f @ [x]
    | _ -> [tree]
  in

  let s = empty_likelihood_summary() in
  let context = ref empty_context in
  
  let rec summarize (r : tp) (environment: tp list) (p: program) : unit =
    match r with
    (* a function - must start out with a sequence of lambdas *)
    | TCon("->",[argument;return_type],_) ->
      let newEnvironment = argument :: environment in
      let body = remove_abstractions 1 p in
      summarize return_type newEnvironment body
    | _ -> (* not a function - must be an application instead of a lambda *)
      let candidates = unifying_expressions g environment r !context in
      match walk_application_tree p with
      | [] -> raise (Failure "walking the application tree")
      | f::xs ->
        match List.find candidates ~f:(fun (candidate,_,_,_) -> program_equal candidate f) with
        | None ->
          s.likelihood_constant <- Float.neg_infinity
        | Some(_, argument_types, newContext, functionLikelihood) ->
          context := newContext;
          record_likelihood_event s f (candidates |> List.map ~f:(fun (candidate,_,_,_) -> candidate));
          List.iter (List.zip_exn xs argument_types)
            ~f:(fun (x,x_t) -> summarize x_t environment x)
  in
  
  summarize request [] expression;
  s

let likelihood_under_grammar g request program =
  make_likelihood_summary g request program |> summary_likelihood g
  


let grammar_has_recursion a g =
  g.library |> List.exists ~f:(fun (p,_,_,_) -> is_recursion_of_arity a p)


(*  *)
type contextual_grammar = {
  no_context : grammar;
  variable_context : grammar;
  contextual_library : (program * grammar list) list;
}

let show_contextual_grammar cg =
  let ls = ["No context grammar:";string_of_grammar cg.no_context;"";
            "Variable context grammar:";string_of_grammar cg.variable_context;"";
           ] @ (cg.contextual_library |> List.map ~f:(fun (e,gs) ->
      gs |> List.mapi ~f:(fun i g ->
          [Printf.sprintf "Parent %s, argument index %i:" (string_of_program e) i;
          string_of_grammar g; ""]) |> List.concat) |> List.concat)
  in join ~separator:"\n" ls

let prune_contextual_grammar (g : contextual_grammar) =
  let prune e gs =
    let t = closed_inference e in
    let argument_types = arguments_of_type t in
    List.map2_exn argument_types gs ~f:(fun argument_type g ->
        let argument_type = return_of_type argument_type in
        {logVariable=g.logVariable;
         continuation_type=g.continuation_type;
         library=g.library |> List.filter ~f:(fun (_,child_type,_,_) ->
             let child_type = return_of_type child_type in
             try
               let k, child_type = instantiate_type empty_context child_type in
               let k, argument_type = instantiate_type k argument_type in
               let _ = unify k child_type argument_type in
               true
             with UnificationFailure -> false)})
  in 
  {no_context=g.no_context;
   variable_context=g.variable_context;
   contextual_library=
     g.contextual_library |> List.map ~f:(fun (e,gs) -> (e, prune e gs))}


let make_dummy_contextual g =
  {no_context=g;
   variable_context=g;
   contextual_library =
     g.library |> List.map ~f:(fun (e,t,_,_) -> (e, arguments_of_type t |> List.map ~f:(fun _ -> g)))} |>
  prune_contextual_grammar


let deserialize_grammar g =
  let open Yojson.Basic.Util in
  let logVariable = g |> member "logVariable" |> to_number in
  let productions = g |> member "productions" |> to_list |> List.map ~f:(fun p ->
    let source = p |> member "expression" |> to_string in
    let e = parse_program source |> safe_get_some ("Error parsing: "^source) in
    let t =
      try
        infer_program_type empty_context [] e |> snd
      with UnificationFailure -> raise (Failure ("Could not type "^source))
    in
    let logProbability = p |> member "logProbability" |> to_number in
    
    (e,t,logProbability,compile_unifier t))
  in
  let continuation_type =
    try Some(g |> member "continuationType" |> deserialize_type)
    with _ -> None
  in
  (* Successfully parsed the grammar *)
  let g = {continuation_type; logVariable; library = productions;} in
  g

let serialize_grammar {logVariable; continuation_type; library} =
  let open Yojson.Basic in
  let j : json =
  `Assoc(["logVariable",`Float(logVariable);
          "productions",`List(library |> List.map ~f:(fun (e,t,l,_) ->
              `Assoc(["expression",`String(string_of_program e);
                      "logProbability",`Float(l)])))] @
         match continuation_type with
         | None -> []
         | Some(it) -> ["continuationType", serialize_type it])
  in
  j
    
let deserialize_contextual_grammar j =
  let open Yojson.Basic.Util in

  {no_context = j |> member "noParent" |> deserialize_grammar;
   variable_context = j |> member "variableParent" |> deserialize_grammar;
   contextual_library =
     j |> member "productions" |> to_list |> List.map ~f:(fun production ->
         let e = production |> member "program" |> to_string in
         let e = 
           try e |> parse_program |> get_some             
           with _ ->
             Printf.eprintf "Could not parse `%s'\n"
               e;
             assert (false)
         in
         let children = production |> member "arguments" |> to_list |> List.map ~f:deserialize_grammar in
         (e, children));} |> prune_contextual_grammar

let deserialize_contextual_grammar g = 
  try deserialize_grammar g |> make_dummy_contextual
  with _ -> deserialize_contextual_grammar g
