# Supplementary material
Source: ML conference proceedings conference paper supplement (https://proceedings.neurips.cc/paper_files/paper/2022/hash/0113ef4642264adc2e6924a3cbbdf532-Abstract.html)
Supplement: Supplementary file 1 [file 0113ef4642264adc2e6924a3cbbdf532-Supplemental-Conference.zip › neurips_supplementary_cameraready/ec-master/solvers/jbuild]

(jbuild_version 1)

(executables
 ((names (solver compression helmholtz geomDrawLambdaString geomDrawFile geomTest logoTest logoDrawString logoSequenceString protonet-tester client versionDemo gridTest))
  (modes (native))
  (ocamlopt_flags (:standard -O3 -unboxed-types -nodynlink -w -20))
  (libraries (core re2 yojson geomLib logoLib ocaml-protoc zmq)) ;parmap
  (preprocess (pps (ppx_jane)))
 ))
