# Supplementary material
Source: ML conference proceedings conference paper supplement (https://proceedings.neurips.cc/paper_files/paper/2022/hash/0113ef4642264adc2e6924a3cbbdf532-Abstract.html)
Supplement: Supplementary file 1 [file 0113ef4642264adc2e6924a3cbbdf532-Supplemental-Conference.zip › neurips_supplementary_cameraready/ec-master/solvers/logoTest.ml]

open LogoLib
open LogoInterpreter

let pi2 = 2. *. 3.1459

let rec unfold f stop b =
if stop b then []
else 
  let x, b' = f b in
   x :: (unfold f stop b')

let star (n : int) : turtle =
  List.fold_left
    (fun (k : turtle) (e : float) : turtle ->
      logo_SEQ
        (logo_SEQ
          (logo_GET
            (fun s ->
              logo_SEQ
                (logo_FW 3.)
                (logo_SET s)
            )
          )
          (logo_RT e)
        )
        k
    )
    logo_NOP
    (List.map
      (fun _ -> 2. /. (float_of_int n))
      (unfold
        (fun x -> (x, x + 1))
        (fun x -> x >= n)
        0
      )
    )

let line : turtle =
  logo_FW 1.

(*let angle : turtle =*)
  (*logo_SEQ*)
    (*(logo_FW logo_var_UNIT)*)
    (*(logo_SEQ*)
      (*(logo_RT (logo_var_HLF logo_var_UNIT))*)
      (*(logo_FW logo_var_UNIT))*)

(*let square1 : turtle =*)
  (*let angle =*)
    (*logo_SEQ*)
      (*(logo_FW logo_var_UNIT)*)
      (*(logo_RT (logo_var_HLF logo_var_UNIT))*)
  (*in*)
  (*let half = logo_SEQ angle angle in*)
  (*logo_SEQ half half*)

(*let square2 : turtle =*)
  (*let angle =*)
    (*logo_SEQ*)
      (*(logo_FW logo_var_UNIT)*)
      (*(logo_RT (logo_var_HLF logo_var_UNIT)) in*)
  (*List.fold_left*)
    (*(fun (k : turtle) (e : float) : turtle ->*)
      (*logo_SEQ*)
        (*k*)
        (*angle*)
    (*)*)
    (*logo_NOP*)
    (*([0.; 1.; 2.; 3.])*)

(*let spiral : int -> turtle = fun n ->*)
  (*List.fold_left*)
    (*(fun (k : turtle) (e : int) : turtle ->*)
      (*logo_SEQ*)
        (*k*)
        (*(logo_SEQ*)
          (*(logo_FW ((float_of_int e) /. 2.))*)
          (*(logo_RT (logo_var_HLF logo_var_UNIT))*)
        (*)*)
    (*)*)
    (*logo_NOP*)
    (*(unfold*)
      (*(fun x -> (x, x + 1))*)
      (*(fun x -> x >= n)*)
      (*0*)
    (*)*)


let _ =
  (*let c1 = eval_turtle line in*)
  (*let c2 = eval_turtle angle in*)
  (*let c3 = eval_turtle square1 in*)
  (*let c4 = eval_turtle square2 in*)
  (*pp_turtle square1;*)
  (*pp_turtle square2;*)
  (*VGWrapper.output_canvas_png c1 28 "line_l.png" ;*)
  (*VGWrapper.output_canvas_png c2 28 "angle_l.png" ;*)
  (*VGWrapper.output_canvas_png c3 28 "square1_l.png" ;*)
  (*VGWrapper.output_canvas_png c4 28 "square2_l.png" ;*)
  (*let _ = eval_turtle ~sequence:("seqSp") (spiral 18)*)
  let _ = eval_turtle ~sequence:("seqSt") (star 12)
  in
  (*pp_turtle (spiral 8) ;*)
  (*VGWrapper.output_canvas_png s8 512 "spiral8_l.png" ;*)
  print_endline "done"
