# Supplementary material
Source: ML conference proceedings conference paper supplement (https://proceedings.neurips.cc/paper_files/paper/2022/hash/0113ef4642264adc2e6924a3cbbdf532-Abstract.html)
Supplement: Supplementary file 1 [file 0113ef4642264adc2e6924a3cbbdf532-Supplemental-Conference.zip › neurips_supplementary_cameraready/ec-master/solvers/timeout.ml]

(* I hate Core *)

open Unix

exception Timeout

let sigalrm_handler = Sys.Signal_handle (fun _ -> raise Timeout)

let run_for_interval' (time : float) (c : unit -> 'a) : 'a option =
  (* Install a new alarm handler *)
  let old_behavior = Sys.signal Sys.sigalrm sigalrm_handler in
  let reset_sigalrm () = Sys.set_signal Sys.sigalrm old_behavior
  in
  try
    ignore (Unix.setitimer ITIMER_REAL {it_interval = 0.0; it_value = time}) ;
    let res = c () in
    ignore (Unix.setitimer ITIMER_REAL {it_interval = 0.0; it_value = 0.0}) ;
    reset_sigalrm () ;
    Some(res)
  with
    | Timeout ->
        begin
          ignore (Unix.setitimer ITIMER_REAL {it_interval = 0.0; it_value = 0.0}) ; 
          reset_sigalrm () ;
          None
        end
    | e ->
        begin
          ignore (Unix.setitimer ITIMER_REAL {it_interval = 0.0; it_value = 0.0}) ;
          reset_sigalrm () ;
          raise e
        end


(* This is stupid *)
(* Turns out you can't really do millisecond timing and languages with garbage collection *)
(* Because the fucking garbage collector could interrupt in the middle of the computation *)
(* and ocaml, the wonderful language it is, does not allow you to temporarily disable the garbage collector *)
(* So this version of run_for_interval allows you to repeatedly try to run the thing for the interval *)
let rec run_for_interval ?attempts:(attempts=1) dt c =
  if attempts < 1 then None else 
    match run_for_interval' dt c with
    | Some(v) -> Some(v)
    | None -> run_for_interval ~attempts:(attempts - 1) dt c
