# Supplementary material
Source: ML conference proceedings conference paper supplement (https://proceedings.neurips.cc/paper_files/paper/2022/hash/0113ef4642264adc2e6924a3cbbdf532-Abstract.html)
Supplement: Supplementary file 1 [file 0113ef4642264adc2e6924a3cbbdf532-Supplemental-Conference.zip › neurips_supplementary_cameraready/ec-master/solvers/versions.ml]

open Core
open Enumeration
open Program
open Utils
open Type


type vs =
  | Union of (int list)
  | ApplySpace of int*int
  | AbstractSpace of int
  | IndexSpace of int
  | TerminalSpace of program
  | Universe | Void

type vt = {universe : int;
           void : int;
           s2i : (vs,int) Hashtbl.t;
           i2s : vs ra;
           (* dynamic programming *)
           recursive_inversion_table : (int option) ra;
           n_step_table : ((int*int),int) Hashtbl.t;
           substitution_table : ((int*int), ((int,int) Hashtbl.t)) Hashtbl.t;}

let index_table t index = get_resizable t.i2s index
let version_table_size t = t.i2s.ra_occupancy

let clear_dynamic_programming_tables {n_step_table; substitution_table;} =
  Hashtbl.clear n_step_table;
  Hashtbl.clear substitution_table;;
let deallocate_versions v =
  clear_dynamic_programming_tables v;
  Hashtbl.clear v.s2i;
  clear_resizable v.i2s;
  clear_resizable v.recursive_inversion_table;;


let rec string_of_versions t j = match index_table t j with
  | Universe -> "U"
  | Void -> "Void"
  | ApplySpace(f, x) -> Printf.sprintf "@(%s, %s)"
                          (string_of_versions t f) (string_of_versions t x)
  | AbstractSpace(b) -> Printf.sprintf "abs(%s)"
                          (string_of_versions t b)
  | IndexSpace(i) -> Printf.sprintf "$%d" i
  | TerminalSpace(p) -> string_of_program p
  | Union(u) -> Printf.sprintf "{%s}"
                  (u |> List.map ~f:(string_of_versions t) |> join ~separator:"; ")

let incorporate_space t v : int =
  match Hashtbl.find t.s2i v with
  | Some(i) -> i
  | None -> begin
      let i = t.i2s.ra_occupancy in
      Hashtbl.set t.s2i ~key:v ~data:i;
      push_resizable t.i2s v;
      push_resizable t.recursive_inversion_table None;
      (* push_resizable t.equivalence_class (union_find_node i); *)
      i
    end

let new_version_table() : vt =
  let t = {void=0;
           universe=1;
           s2i=Hashtbl.Poly.create();
           i2s=empty_resizable();
           (* equivalence_class=empty_resizable(); *)
           substitution_table=Hashtbl.Poly.create();
           n_step_table=Hashtbl.Poly.create();
           recursive_inversion_table=empty_resizable();} in
  assert (incorporate_space t Void = t.void);
  assert (incorporate_space t Universe = t.universe);
  t

let version_apply t f x =
  if f = t.void || x = t.void then t.void else incorporate_space t (ApplySpace(f,x))
let version_abstract t b =
  if b = t.void then t.void else incorporate_space t (AbstractSpace(b))
let version_index t i = incorporate_space t (IndexSpace(i))
let version_terminal t e =
  incorporate_space t (TerminalSpace(e))
let union t vs =
  if List.mem vs (t.universe) ~equal:(=) then t.universe else
    let vs = vs |> List.concat_map  ~f:(fun v -> match index_table t v with
        | Union(stuff) -> stuff
        | Void -> []
        | Universe -> assert false
        | _ -> [v]) |> List.dedup_and_sort ~compare:(-) in
    match vs with
    | [] -> t.void
    | [v] -> v
    | _ -> incorporate_space t (Union(vs))
    
let rec incorporate t e =
  match e with
  | Index(i) -> version_index t i
  | Abstraction(b) -> version_abstract t (incorporate t b)
  | Apply(f,x) -> version_apply t (incorporate t f) (incorporate t x)
  | Primitive(_,_,_) | Invented(_,_) -> version_terminal t (strip_primitives e)


let rec extract t j =
  match index_table t j with
  | Union(u) -> List.concat_map u ~f:(extract t)
  | ApplySpace(f,x) ->
    extract t f |> List.concat_map ~f:(fun f' ->
        extract t x |> List.map ~f:(fun x' ->
            Apply(f',x')))
  | IndexSpace(i) -> [Index(i)]
  | Void -> []
  | TerminalSpace(p) -> [p]
  | AbstractSpace(b) ->
    extract t b |> List.map ~f:(fun b' ->
        Abstraction(b'))
  | Universe -> [primitive "UNIVERSE" t0 ()]

let rec child_spaces t j =
  (j :: 
   match index_table t j with
   | Union(u) -> List.map u ~f:(child_spaces t) |> List.concat
   | ApplySpace(f,x) -> child_spaces t f @ child_spaces t x
   | AbstractSpace(b) -> child_spaces t b
   | _ -> [])
  |> List.dedup_and_sort ~compare:(-)
    
let rec shift_free ?c:(c=0) t ~n ~index =
  if n = 0 then index else
    match index_table t index with
    | Union(indices) ->
      union t (indices |> List.map ~f:(fun i -> shift_free ~c:c t ~n:n ~index:i))
    | IndexSpace(i) when i < c -> index (* below cut off - bound variable *)
    | IndexSpace(i) when i >= n + c -> version_index t (i - n) (* free variable *)
    | IndexSpace(_) -> t.void
    | ApplySpace(f,x) ->
      version_apply t (shift_free ~c:c t ~n:n ~index:f) (shift_free ~c:c t ~n:n ~index:x)
    | AbstractSpace(b) ->
      version_abstract t (shift_free ~c:(c+1) t ~n:n ~index:b)
    | TerminalSpace(_) | Universe | Void -> index

let rec shift_versions ?c:(c=0) t ~n ~index =
  (* shift_free_variables, lifted to vs *)
  if n = 0 then index else
    match index_table t index with
    | Union(indices) ->
      union t (indices |> List.map ~f:(fun i -> shift_versions ~c:c t ~n:n ~index:i))
    | IndexSpace(i) when i < c -> index (* below cut off - bound variable *)
    | IndexSpace(i) when i + n >= 0 -> version_index t (i + n) (* free variable *)
    | IndexSpace(_) -> t.void
    | ApplySpace(f,x) ->
      version_apply t (shift_versions ~c:c t ~n:n ~index:f) (shift_versions ~c:c t ~n:n ~index:x)
    | AbstractSpace(b) ->
      version_abstract t (shift_versions ~c:(c+1) t ~n:n ~index:b)
    | TerminalSpace(_) | Universe | Void -> index
    

let rec subtract t a b =
  match index_table t a, index_table t b with
  | Universe, _ -> assert (false)
  | _, Universe -> assert (false)
  | Void, _ -> t.void
  | _, Void -> a
  | Union(xs), _ ->
    xs |> List.map ~f:(fun x -> subtract t x b) |> union t
  | _, Union(xs) ->
    List.fold_right xs ~init:a ~f:(fun to_remove current -> subtract t current to_remove)
  | AbstractSpace(b1), AbstractSpace(b2) ->
    version_abstract t (subtract t b1 b2)
  | AbstractSpace(_), _ -> a
  | ApplySpace(f1,x1), ApplySpace(f2,x2) ->
    union t [version_apply t (subtract t f1 f2) x1;
             version_apply t f1 (subtract t x1 x2)]
  | ApplySpace(_,_), _ -> a
  | IndexSpace(i1), IndexSpace(i2) when i1 = i2 -> t.void
  | IndexSpace(i1), _ -> a
  | TerminalSpace(t1), TerminalSpace(t2) when t1 = t2 -> t.void
  | TerminalSpace(_), _ -> a

    
let rec unique_space t a =
  match index_table t a with
  | Universe | Void | IndexSpace(_) | TerminalSpace(_) -> a
  | AbstractSpace(b) -> version_abstract t (unique_space t b)
  | ApplySpace(f,x) -> version_apply t (unique_space t f) (unique_space t x)
  | Union(u) ->
    List.fold_right u ~init:t.void ~f:(fun u' total ->
        union t [total; subtract t (unique_space t u') total])


let rec intersection t a b =
  match index_table t a, index_table t b with
  | Universe, _ -> b
  | _, Universe -> a
  | Void, _ | _, Void -> t.void
  | Union(xs), Union(ys) ->
    xs |> List.concat_map ~f:(fun x -> ys |> List.map ~f:(fun y -> intersection t x y)) |> union t
  | Union(xs), _ -> 
    xs |> List.map ~f:(fun x -> intersection t x b) |> union t
  | _, Union(xs) ->
    xs |> List.map ~f:(fun x -> intersection t x a) |> union t
  | AbstractSpace(b1), AbstractSpace(b2) ->
    version_abstract t (intersection t b1 b2)
  | ApplySpace(f1,x1), ApplySpace(f2,x2) ->
    version_apply t (intersection t f1 f2) (intersection t x1 x2)
  | IndexSpace(i1), IndexSpace(i2) when i1 = i2 -> a
  | TerminalSpace(t1), TerminalSpace(t2) when t1 = t2 -> a
  | _ -> t.void

let inline t j =
  (* Replaces (#(\ \... B) a1 a2 ... x y z) w/ B[n > a1][n - 1 > a2]... x y z *)
  (* Only performs this operation at the top level *)
  let rec il (arguments : int list) (j : int) : int =
    match index_table t j with
    | ApplySpace(f, x) -> il (x :: arguments) f
    | AbstractSpace(_) | IndexSpace(_) | TerminalSpace(Primitive(_,_,_)) -> t.void
    | Union(vs) -> vs |> List.map ~f:(il arguments) |> union t
    | TerminalSpace(Invented(_,body)) -> begin
        let rec make_substitution used_arguments unused_arguments body = match unused_arguments, body with
          | [], Abstraction(_) -> None
          | [], _ -> Some((used_arguments, body))
          | x :: xs, Abstraction(b) -> make_substitution (x :: used_arguments) xs b
          | _ :: _, _ -> Some((used_arguments, body))
        in
        let rec apply_substitution ~k arguments expression = match expression with
          | Index(i) when i < k -> version_index t i
          (* i >= k *)
          | Index(i) when i - k < List.length arguments ->
            shift_versions t ~n:k ~index:(List.nth_exn arguments (i - k))
          (* i >= k + |arguments| *)
          | Index(i) -> version_index t (i - List.length arguments)
          | Apply(f,x) -> version_apply t (apply_substitution ~k arguments f) (apply_substitution ~k arguments x)
          | Abstraction(b) -> version_abstract t (apply_substitution ~k:(k+1) arguments b)
          | Primitive(_,_,_) | Invented(_,_) -> incorporate t expression
        in
        match make_substitution [] arguments body with
        | None -> t.void
        | Some((used_arguments, body)) ->
          let f = apply_substitution ~k:0 used_arguments body in
          let remaining_arguments = List.drop arguments (List.length used_arguments) in
          remaining_arguments |> List.fold_left ~init:f ~f:(version_apply t)
      end
    | Void | Universe | TerminalSpace(_) -> t.void
  in
  il [] j
        
let rec recursive_inlining t j =
  (* Constructs vs of all programs that are 1 inlining step away from a program in provided vs *)
  match index_table t j with
  | Union(u) -> u |> List.map ~f:(recursive_inlining t) |> union t
  | AbstractSpace(b) -> version_abstract t (recursive_inlining t b)
  | IndexSpace(_) | Void | Universe | TerminalSpace(Primitive(_)) -> t.void
  (* Must either be an application or an invented leaf *)
  | _ ->
    let top_linings = inline t j in
    let rec inline_arguments j = match index_table t j with
      | ApplySpace(f,x) -> version_apply t f (recursive_inlining t x)
      | Union(u) -> u |> List.map ~f:inline_arguments |> union t
      | AbstractSpace(_) | TerminalSpace(_) | Universe | Void | IndexSpace(_) -> t.void
    in 
    let argument_linings = inline_arguments j in
    union t [top_linings; argument_linings;]
      
      

let rec have_intersection ?table:(table=None) t a b =
  if a = b then true else
    let a, b = if a > b then (b,a) else (a,b) in

    let intersect a b =
      match index_table t a, index_table t b with
      | Void, _ | _, Void -> false
      | Universe, _ -> true
      | _, Universe -> true
      | Union(xs), Union(ys) ->
        xs |> List.exists ~f:(fun x -> ys |> List.exists ~f:(fun y -> have_intersection ~table t x y))
      | Union(xs), _ -> 
        xs |> List.exists ~f:(fun x -> have_intersection ~table t x b)
      | _, Union(xs) ->
        xs |> List.exists ~f:(fun x -> have_intersection ~table t x a)
      | AbstractSpace(b1), AbstractSpace(b2) ->
        have_intersection ~table t b1 b2
      | ApplySpace(f1,x1), ApplySpace(f2,x2) ->
        have_intersection ~table t f1 f2 && have_intersection ~table t x1 x2
      | IndexSpace(i1), IndexSpace(i2) when i1 = i2 -> true
      | TerminalSpace(t1), TerminalSpace(t2) when t1 = t2 -> true
      | _ -> false
    in
    
    match table with
    | None -> intersect a b
    | Some(table') ->
      match Hashtbl.find table' (a,b) with
      | Some(i) -> i
      | None ->
        let i = intersect a b in
        Hashtbl.set table' ~key:(a,b) ~data:i;
        i

let factored_substitution = ref false;;

let rec substitutions t ?n:(n=0) index =
  match Hashtbl.find t.substitution_table (index,n) with
  | Some(s) -> s
  | None ->

    let s = shift_free t ~n:n ~index in
    let m = Hashtbl.Poly.create() in
    if s <> t.void then ignore(Hashtbl.add m ~key:s ~data:(version_index t n));

    begin 
      match index_table t index with
      | TerminalSpace(_) -> ignore(Hashtbl.add m ~key:t.universe ~data:index)
      | IndexSpace(i) ->
        ignore(Hashtbl.add m ~key:t.universe ~data:(if i < n then index else version_index t (1+i)))
      | AbstractSpace(b) ->
        substitutions t ~n:(n+1) b |> Hashtbl.iteri ~f:(fun ~key ~data ->
            Hashtbl.add_exn m ~key ~data:(version_abstract t data))
      | Union(u) ->
        let new_mapping = Hashtbl.Poly.create() in
        u |> List.iter ~f:(fun x ->
            substitutions t ~n x |> Hashtbl.iteri ~f:(fun ~key:v ~data:b ->
                match Hashtbl.find new_mapping v with
                | Some(stuff) -> Hashtbl.set new_mapping ~key:v ~data:(b :: stuff)
                | None -> Hashtbl.set new_mapping ~key:v ~data:[b]));
        new_mapping |> Hashtbl.iteri ~f:(fun ~key ~data ->
            Hashtbl.set m ~key ~data:(union t data))          

      | ApplySpace(f, x) when !factored_substitution ->
        let new_mapping = Hashtbl.Poly.create() in
        let fm = substitutions t ~n f in
        let xm = substitutions t ~n x in

        fm |> Hashtbl.iteri ~f:(fun ~key:v1 ~data:f ->
            xm |> Hashtbl.iteri ~f:(fun ~key:v2 ~data:x ->
                if have_intersection t v1 v2 then                   
                  Hashtbl.update new_mapping (intersection t v1 v2) ~f:(function
                      | None -> ([f],[x])
                      | Some(fs,xs) -> (f :: fs, x :: xs))));
        new_mapping |> Hashtbl.iteri ~f:(fun ~key ~data:(fs,xs) ->
            let fs = union t fs in
            let xs = union t xs in
            Hashtbl.set m ~key ~data:(version_apply t fs xs))

      | ApplySpace(f, x) ->         
        let new_mapping = Hashtbl.Poly.create() in
        let fm = substitutions t ~n f in
        let xm = substitutions t ~n x in

        fm |> Hashtbl.iteri ~f:(fun ~key:v1 ~data:f ->
            xm |> Hashtbl.iteri ~f:(fun ~key:v2 ~data:x ->
                if have_intersection t v1 v2 then begin
                  let v = intersection t v1 v2 in
                  let a = version_apply t f x in
                  match Hashtbl.find new_mapping v with
                  | Some(stuff) -> Hashtbl.set new_mapping ~key:v ~data:(a :: stuff)
                  | None -> Hashtbl.set new_mapping ~key:v ~data:[a]
                end));

        new_mapping |> Hashtbl.iteri ~f:(fun ~key ~data ->
            Hashtbl.set m ~key ~data:(union t data))          

      | _ -> ()
    end;
    Hashtbl.set (t.substitution_table) ~key:(index,n) ~data:m;
    m

let inversion t j =
  substitutions t j |> Hashtbl.to_alist |>
  List.filter_map ~f:(fun (v,b) ->
      if v = t.universe || index_table t b = IndexSpace(0) then None else 
      Some(version_apply t (version_abstract t b) v)) |>
  union t

let rec recursive_inversion t j =
  match get_resizable t.recursive_inversion_table j with
  | Some(ri) -> ri
  | None ->
    let ri = 
      match index_table t j with
      | Union(u) -> union t (u |> List.map ~f:(recursive_inversion t))
      | _ ->
        let top_inversions = substitutions t j |> Hashtbl.to_alist |>
                             List.filter_map ~f:(fun (v,b) ->
                                 if v = t.universe || index_table t b = IndexSpace(0) then None else 
                                   Some(version_apply t (version_abstract t b) v))
        in
        let child_inversions = match index_table t j with
          | ApplySpace(f, x) -> [version_apply t (recursive_inversion t f) x;
                                 version_apply t f (recursive_inversion t x)]
          | AbstractSpace(b) -> [version_abstract t (recursive_inversion t b)]
          | _ -> []
        in
        union t (child_inversions @ top_inversions)
    in
    set_resizable t.recursive_inversion_table j (Some(ri));
    ri

let beta_pruning t j = 
let rec beta_pruning' ?isApplied:(isApplied=false) ?canBeta:(canBeta=true)
    t j =
  match index_table t j with
  | ApplySpace(f,x) ->
    let f' =  beta_pruning' ~canBeta ~isApplied:true t f in
    let x' =  beta_pruning' ~canBeta ~isApplied:false t x in
    version_apply t f' x'
  | AbstractSpace(_) when isApplied && not canBeta -> t.void
  | AbstractSpace(b) when isApplied && canBeta ->
    let b' = beta_pruning' ~isApplied:false ~canBeta:false t b in
    version_abstract t b'
  | AbstractSpace(b) ->
    let b' = beta_pruning' ~isApplied:false ~canBeta t b in
    version_abstract t b'
  | Union(u) ->
    u |> List.map ~f:(beta_pruning' ~isApplied ~canBeta t) |> union t
  | IndexSpace(_) | TerminalSpace(_) | Universe | Void -> j
in beta_pruning' t j
  
let rec log_version_size t j = match index_table t j with
  | ApplySpace(f,x) -> log_version_size t f +. log_version_size t x
  | AbstractSpace(b) -> log_version_size t b
  | Union(u) -> u |> List.map ~f:(log_version_size t) |> lse_list
  | _ -> 0.

let rec n_step_inversion ?inline:(il=false) t ~n j =
  let key = (n, j) in
  match Hashtbl.find t.n_step_table key with
  | Some(ns) -> ns
  | None -> 
    (* list of length (n+1), corresponding to 0 steps, 1, ..., n *)
    (* Each "step" is the union of an inverse inlining step and optionally an inlining step *)
    let rec n_step ?completed:(completed=0) current : int list =
      let step v =
        if il then
          let i = inline t v in
          (* if completed = 0 && v = j then *)
          (*   extract t i |> List.iter ~f:(fun expansion -> *)
          (*       Printf.eprintf "%s\t%s\n" *)
          (*         (extract t current |> List.hd_exn |> string_of_program) (string_of_program expansion)); *)
          union t [recursive_inversion t v; i]
        else
          recursive_inversion t v
      in 
      let rest = if completed = n then [] else
          n_step ~completed:(completed+1) (step current)            
      in
      beta_pruning t current :: rest
    in

    let rec visit j =
      let children = match index_table t j with
        | Union(_) | Void | Universe -> assert false
        | ApplySpace(f,x) -> version_apply t (visit f) (visit x)
        | AbstractSpace(b) -> version_abstract t (visit b)
        | IndexSpace(_) | TerminalSpace(_) -> j
      in 
      union t (children :: n_step j)
    in 

    let ns = visit j |> beta_pruning t in
    Hashtbl.set t.n_step_table key ns;
    ns

(* let n_step_inversion ?inline:(il=false) t ~n j = *)
(*   let clear_all_caches() =  *)
(*     clear_dynamic_programming_tables t; *)
(*     for j = 0 to (t.recursive_inversion_table.ra_occupancy - 1) do *)
(*       set_resizable t.recursive_inversion_table j None *)
(*     done *)
(*   in *)
(*   clear_all_caches(); *)

(*   factored_substitution := false; *)

(*   let ground_truth = n_step_inversion ~inline:il t ~n j in *)

(*   clear_all_caches(); *)
(*   factored_substitution := true; *)

(*   let faster = n_step_inversion ~inline:il t ~n j in *)

(*   clear_all_caches(); *)
(*   factored_substitution := false; *)

(*   let correct = extract t ground_truth |> List.map ~f:string_of_program |> String.Set.of_list in *)
(*   let hopeful = extract t faster |> List.map ~f:string_of_program |> String.Set.of_list in *)

(*   let missing = Set.diff correct hopeful in *)
(*   let extraneous = Set.diff hopeful correct in *)

(*   if Set.length missing > 0 || Set.length extraneous > 0 then begin *)
(*     let target_of_inversion = extract t j |> List.hd_exn in *)
(*     (\* False alarms *\) *)
(*     if Set.length missing = 0 && Set.for_all extraneous  ~f:(fun p -> *)
(*         let p = parse_program p |> get_some |> beta_normal_form in *)
(*         program_equal p target_of_inversion) then () *)
(*     else begin  *)
(*       Printf.eprintf "FATAL: When inverting %s\n" (target_of_inversion |> string_of_program); *)
(*       Printf.eprintf "The following programs are correct inversions that were not in the fast versions:\n"; *)
(*       missing |> Set.iter ~f:(Printf.eprintf "%s\n"); *)
(*       Printf.eprintf "The following programs are incorrect inversions that were nonetheless generated:\n"; *)
(*       extraneous |> Set.iter ~f:(fun p -> Printf.eprintf "%s\n" p; *)
(*                                   let p = parse_program p |> get_some |> beta_normal_form in *)
(*                                   Printf.eprintf "\t--> %s\n" (string_of_program p)); *)
(*       assert (false) *)
(*     end *)
(*   end; *)

(*   ground_truth *)
  
  

let reachable_versions t indices : int list =
  let visited = Hash_set.Poly.create() in

  let rec visit j = if Hash_set.mem visited j then () else
      (Hash_set.add visited j;
       match index_table t j with
       | Universe | Void | IndexSpace(_) | TerminalSpace(_) -> ()
       | AbstractSpace(b) -> visit b
       | ApplySpace(f,x) -> (visit f; visit x)
       | Union(u) -> u |> List.iter ~f:visit)
  in
  indices |> List.iter ~f:visit;
  Hash_set.fold visited ~f:(fun a x -> x :: a) ~init:[]

(* garbage collection *)
let garbage_collect_versions ?verbose:(verbose=false) t indices =
  let nt = new_version_table() in
  let rec reincorporate i = match index_table t i with
    | Union(u) -> union nt (u |> List.map ~f:reincorporate)
    | ApplySpace(f,x) -> version_apply nt (reincorporate f) (reincorporate x)
    | AbstractSpace(b) -> version_abstract nt (reincorporate b)
    | IndexSpace(i) -> version_index nt i
    | TerminalSpace(p) -> version_terminal nt p
    | Universe -> nt.universe
    | Void -> nt.void
  in
  let indices = indices |> List.map ~f:(List.map ~f:reincorporate) in
  if verbose then
    Printf.eprintf "Garbage collection reduced table to %d%% of previous size\n"
      (100*nt.i2s.ra_occupancy/t.i2s.ra_occupancy);
  (nt, indices)
  

(* cost calculations *)
let epsilon_cost = 0.01;;

(* Holds the minimum cost of each version space *)
type cost_table = {function_cost : ((float*(int list)) option) ra;
                   argument_cost : ((float*(int list)) option) ra;
                   cost_table_parent : vt;}

let empty_cost_table t = {function_cost = empty_resizable();
                          argument_cost = empty_resizable();
                          cost_table_parent = t;}
let rec minimum_cost_inhabitants ?given:(given=None) ?canBeLambda:(canBeLambda=true) t j : float*(int list) =
  let caching_table = if canBeLambda then t.argument_cost else t.function_cost in
  ensure_resizable_length caching_table (j + 1) None;
  
  match get_resizable caching_table j with
  | Some(c) -> c
  | None ->
    let c =
      match given with
      | Some(invention) when have_intersection t.cost_table_parent invention j -> (1., [invention])
      | _ -> 
      match index_table t.cost_table_parent j with
      | Universe | Void -> assert false
      | IndexSpace(_) | TerminalSpace(_) -> (1., [j])
      | Union(u) ->
        let children = u |> List.map ~f:(minimum_cost_inhabitants ~given ~canBeLambda t) in
        let c = children |> List.map ~f:(fun (cost,_) -> cost) |> fold1 min in
        if is_invalid c then (c,[]) else
          let children = children |> List.filter ~f:(fun (cost,_) -> cost = c) in
          (c, children |> List.concat_map ~f:(fun (_,p) -> p))
      | AbstractSpace(b) when canBeLambda ->
        let cost, children = minimum_cost_inhabitants ~given ~canBeLambda:true t b in
        (cost+.epsilon_cost, children |> List.map ~f:(version_abstract t.cost_table_parent))
      | AbstractSpace(b) -> (Float.infinity,[])
      | ApplySpace(f,x) ->
        let fc, fs = minimum_cost_inhabitants ~given ~canBeLambda:false t f in
        let xc, xs = minimum_cost_inhabitants ~given ~canBeLambda:true t x in
        if is_invalid fc || is_invalid xc then (Float.infinity,[]) else
          (fc+.xc+.epsilon_cost,
          fs |> List.map ~f:(fun f' -> xs |> List.map ~f:(fun x' -> version_apply t.cost_table_parent f' x')) |> List.concat)
    in
    let cost, indices = c in
    let indices = indices |> List.dedup_and_sort ~compare:(-) in
    let c = (cost, indices) in
    set_resizable caching_table j (Some(c));
    c

(* Holds the minimum cost of each version space, WITHOUT actually holding the programs *)
type cheap_cost_table = {function_cost : (float option) ra;
                         argument_cost : (float option) ra;
                         cost_table_parent : vt;}

let empty_cheap_cost_table t = {function_cost = empty_resizable();
                                argument_cost = empty_resizable();
                                cost_table_parent = t;}
let rec minimal_inhabitant_cost
    ?intersectionTable:(intersectionTable=None) ?given:(given=None) ?canBeLambda:(canBeLambda=true) t j : float =
  let caching_table = if canBeLambda then t.argument_cost else t.function_cost in
  ensure_resizable_length caching_table (j + 1) None;
  
  match get_resizable caching_table j with
  | Some(c) -> c
  | None ->
    let c =
      match given with
      | Some(invention) when have_intersection ~table:intersectionTable t.cost_table_parent invention j -> 1.
      | _ -> 
      match index_table t.cost_table_parent j with
      | Universe | Void -> assert false
      | IndexSpace(_) | TerminalSpace(_) -> 1.
      | Union(u) ->
         u |> List.map ~f:(minimal_inhabitant_cost ~intersectionTable ~given ~canBeLambda t) |> fold1 min
      | AbstractSpace(b) when canBeLambda ->
        epsilon_cost +. minimal_inhabitant_cost ~intersectionTable ~given ~canBeLambda:true t b
      | AbstractSpace(b) -> Float.infinity
      | ApplySpace(f,x) ->
        epsilon_cost +. minimal_inhabitant_cost ~intersectionTable ~given ~canBeLambda:false t f +.
        minimal_inhabitant_cost ~intersectionTable ~given ~canBeLambda:true t x 
    in
    set_resizable caching_table j (Some(c));
    c

let rec minimal_inhabitant
    ?intersectionTable:(intersectionTable=None) ?given:(given=None) ?canBeLambda:(canBeLambda=true)
    t j : program option =
  let c = minimal_inhabitant_cost ~intersectionTable ~given ~canBeLambda t j in
  if is_invalid c then None else
    let vs = index_table t.cost_table_parent j in
    let p =
      match c, given with
      | 1., Some(invention) when have_intersection ~table:intersectionTable t.cost_table_parent invention j ->
        extract t.cost_table_parent invention |> singleton_head
      | _ -> 
      match vs with
      | Universe | Void -> assert false
      | IndexSpace(_) | TerminalSpace(_) ->
        extract t.cost_table_parent j |> singleton_head
      | Union(u) ->
        u |> minimum_by (minimal_inhabitant_cost ~intersectionTable ~given ~canBeLambda t) |>
        minimal_inhabitant ~intersectionTable ~given ~canBeLambda t |>
        get_some
      | AbstractSpace(b) ->
        Abstraction(minimal_inhabitant ~intersectionTable ~given ~canBeLambda:true t b |> get_some)
      | ApplySpace(f,x) ->
        Apply(minimal_inhabitant ~intersectionTable ~given ~canBeLambda:false t f |> get_some,
              minimal_inhabitant ~intersectionTable ~given ~canBeLambda:true t x |> get_some)
    in
    Some(p)

type beam = {default_function_cost : float;
             default_argument_cost : float;
             mutable relative_function : (int,float) Hashtbl.t;
             mutable relative_argument : (int,float) Hashtbl.t;}

let narrow ~bs b =
  let narrow bm =
    if Hashtbl.length bm > bs then 
      let sorted = Hashtbl.to_alist bm |> List.sort ~compare:(fun (_,c1) (_,c2) -> Float.compare c1 c2) in      
      Hashtbl.Poly.of_alist_exn (List.take sorted bs)          
    else bm
  in
  b.relative_function <- narrow b.relative_function;
  b.relative_argument <- narrow b.relative_argument
;;
let relax table key data =
  match Hashtbl.find table key with
  | None -> Hashtbl.set table ~key ~data
  | Some(old) when old > data -> Hashtbl.set table ~key ~data
  | Some(_) -> ()
;;
let relative_function b i = match Hashtbl.find b.relative_function i with
  | None -> b.default_function_cost
  | Some(c) -> c
;;
let relative_argument b i = match Hashtbl.find b.relative_argument i with
  | None -> b.default_argument_cost
  | Some(c) -> c
;;

(* calculate the number of free variables for each candidate  *)
(* if a candidate has free variables and whenever we use it we have to apply it to those variables *)
(* thus using these candidates is more expensive *)
let calculate_candidate_costs v candidates =
  let candidate_cost = Hashtbl.Poly.create() in
  candidates |> List.iter ~f:(fun k ->
      let cost = extract v k |> singleton_head |> free_variables ~d:0 |>
                 List.dedup_and_sort ~compare:(-) |> List.length |> Float.of_int in
      Hashtbl.set candidate_cost ~key:k ~data:(1.+.cost));
  candidate_cost
  

let beam_costs'' ~ct ~bs (candidates : int list) (frontier_indices : (int list) list)
  : beam option ra =
  let ct : cost_table = ct in
  let candidates' = candidates in
  let candidates = Hash_set.Poly.of_list candidates in
  let caching_table = empty_resizable() in
  let v = ct.cost_table_parent in

  let candidate_cost = calculate_candidate_costs v candidates' in

  let rec calculate_costs j =
    ensure_resizable_length caching_table (j + 1) None;    
    match get_resizable caching_table j with
    | Some(bm) -> bm
    | None ->
      let default_argument_cost, inhabitants = minimum_cost_inhabitants ~canBeLambda:true ct j in
      let default_function_cost, _ = minimum_cost_inhabitants ~canBeLambda:false ct j in
      let bm = {default_argument_cost;
                default_function_cost;
                relative_function=Hashtbl.Poly.create();
                relative_argument=Hashtbl.Poly.create();}
      in
      inhabitants |> List.filter ~f:(Hash_set.mem candidates) |> List.iter ~f:(fun candidate ->
          let cost = Hashtbl.find_exn candidate_cost candidate in
          Hashtbl.set bm.relative_function ~key:candidate ~data:cost;
          Hashtbl.set bm.relative_argument ~key:candidate ~data:cost);
      (match index_table v j with
       | AbstractSpace(b) ->
         let child = calculate_costs b in
         child.relative_argument |> Hashtbl.iteri ~f:(fun ~key ~data ->
             relax bm.relative_argument key (data+.epsilon_cost))
       | ApplySpace(f,x) ->
         let fb = calculate_costs f in
         let xb = calculate_costs x in
         let domain = Hashtbl.keys fb.relative_function @ Hashtbl.keys xb.relative_argument in
         domain |> List.iter ~f:(fun i ->
             let c = epsilon_cost +. relative_function fb i +. relative_argument xb i in
             relax bm.relative_function i c;
             relax bm.relative_argument i c)
       | Union(u) -> u |> List.iter ~f:(fun u ->
           let child = calculate_costs u in
           child.relative_function |> Hashtbl.iteri ~f:(fun ~key ~data ->
               relax bm.relative_function key data);
           child.relative_argument |> Hashtbl.iteri ~f:(fun ~key ~data ->
               relax bm.relative_argument key data))
       | IndexSpace(_) | Universe | Void | TerminalSpace(_) -> ());
      narrow ~bs bm;
      set_resizable caching_table j (Some(bm));
      bm
  in

  frontier_indices |> List.iter ~f:(List.iter ~f:(fun j -> ignore(calculate_costs j)));
  caching_table


(* For each of the candidates returns the minimum description length of the frontiers *)
let beam_costs' ~ct ~bs (candidates : int list) (frontier_indices : (int list) list)
  : float list =
  let caching_table = beam_costs'' ~ct ~bs candidates frontier_indices in
  let frontier_beams = frontier_indices |> List.map ~f:(List.map ~f:(fun j ->
    get_resizable caching_table j |> get_some)) in

  let score i =
    let corpus_size = frontier_beams |> List.map ~f:(fun bs ->
        bs |> List.map ~f:(fun b -> min (relative_argument b i) (relative_function b i)) |>
        fold1 min) |> fold1 (+.)
    in
    corpus_size
  in

  candidates |> List.map ~f:score

  
  
let beam_costs ~ct ~bs (candidates : int list) (frontier_indices : (int list) list) =
  let scored = List.zip_exn (beam_costs' ~ct ~bs candidates frontier_indices) candidates in
  scored |> List.sort ~compare:(fun (s1,_) (s2,_) -> Float.compare s1 s2)


let batched_refactor ~ct (candidates : int list) (frontier_indices : (int list) list) =
  let caching_table = beam_costs'' ~ct ~bs:(List.length candidates) candidates frontier_indices in

  let v = ct.cost_table_parent in
  
  let rec refactor ~canBeLambda i j =
    let inhabitants = minimum_cost_inhabitants ~canBeLambda:true ct j |> snd in

    if List.mem ~equal:(=) inhabitants i then
      i |> extract v |> singleton_head
    else
      match index_table v j with
      | AbstractSpace(b) -> (assert (canBeLambda); Abstraction(refactor ~canBeLambda:true i b))
      | ApplySpace(f, x) ->
        Apply(refactor ~canBeLambda:false i f,
              refactor ~canBeLambda:true i x)
      | Union(u) ->
        u |> minimum_by (fun u' ->
            let bm' = get_resizable caching_table u' |> get_some in
            (if canBeLambda then relative_argument else relative_function) bm' i) |>
        refactor ~canBeLambda i
      | IndexSpace(j) -> Index(j) | TerminalSpace(e) -> e
      | Universe | Void -> assert (false)
  in

  candidates |> List.map ~f:(fun i ->
      frontier_indices |> List.map ~f:(fun f ->
          f |> List.map ~f:(fun j ->
              refactor ~canBeLambda:true i j)))
