# Supplementary material
Source: ML conference proceedings conference paper supplement (https://proceedings.neurips.cc/paper_files/paper/2022/hash/0113ef4642264adc2e6924a3cbbdf532-Abstract.html)
Supplement: Supplementary file 1 [file 0113ef4642264adc2e6924a3cbbdf532-Supplemental-Conference.zip › neurips_supplementary_cameraready/ec-master/tests/test_logo.py]

import unittest


class TestLogoMain(unittest.TestCase):

    def test_imports(self):
        try:
            from dreamcoder.domains.logo.main import (
                animateSolutions,
                dreamFromGrammar,
                list_options,
                outputDreams,
                enumerateDreams,
                visualizePrimitives,
                Flatten,
                LogoFeatureCNN,
                main
            )
        except Exception:
            self.fail('Unable to import logo module')


if __name__ == '__main__':
    unittest.main()
