# Supplementary material
Source: ML conference proceedings conference paper supplement (https://proceedings.neurips.cc/paper_files/paper/2022/hash/0113ef4642264adc2e6924a3cbbdf532-Abstract.html)
Supplement: Supplementary file 1 [file 0113ef4642264adc2e6924a3cbbdf532-Supplemental-Conference.zip › neurips_supplementary_cameraready/ec-master/tests/test_symmetryBreaking.py]

import unittest


class TestSymmetryBreaking(unittest.TestCase):

    def test_imports(self):
        try:
            from bin.symmetryBreaking import main
        except Exception:
            self.fail('Unable to import from symmetryBreaking module')


if __name__ == '__main__':
    unittest.main()
