# Supplementary material
Source: ML conference proceedings conference paper supplement (https://proceedings.neurips.cc/paper_files/paper/2022/hash/0113ef4642264adc2e6924a3cbbdf532-Abstract.html)
Supplement: Supplementary file 1 [file 0113ef4642264adc2e6924a3cbbdf532-Supplemental-Conference.zip › neurips_supplementary_cameraready/ec-master/tests/test_tower.py]

import unittest


class TestTowerMain(unittest.TestCase):

    def test_imports(self):
        try:
            from dreamcoder.domains.tower.main import (
                Flatten,
                TowerCNN,
                tower_options,
                dreamOfTowers,
                visualizePrimitives,
                main
            )
        except Exception:
            self.fail('Unable to import tower module')


if __name__ == '__main__':
    unittest.main()
